# Supplementary material
Source: PubMed Central journal article supplement (PMC9382773)
Supplement: 12913_2022_8402_MOESM1_ESM.pdf [file 12913_2022_8402_MOESM1_ESM.pdf]

|     |               |       |       |       |       |       |       |       |       |       |       |       |       |       |       |       |       |       |       |       |       |       |       |       |       |       |        |           |       |       |       |       |       |       |       |       |       |
|-----|---------------|-------|-------|-------|-------|-------|-------|-------|-------|-------|-------|-------|-------|-------|-------|-------|-------|-------|-------|-------|-------|-------|-------|-------|-------|-------|--------|-----------|-------|-------|-------|-------|-------|-------|-------|-------|-------|
| 106 | 2 2329333     | 6     | 7     | 7     | 6     | 6     | 6     | 6     | 6     | 6     | 7     | 6     | 6     | 6     | 6     | 6     | 4     | 6     | 2     | 4     | 4     | 4     | 5     | 5     | 5     | 2     | 7      | 2         | 4     | 1     | 5,06  | 7,00  | 4,00  | 34    | #NIČ! |       |       |
| 107 | 2 7457988     | 5     | 7     | 6     | 6     | 6     | 6     | 6     | 4     | 2     | 6     | 6     | 6     | 5     | 5     | 2     | 3     | 5     | 3     | 3     | 3     | 3     | 3     | 2     | 2     | 6     | 18     | 3         | 2     | 2     | 4,06  | 18,00 | 3,00  | 34    | #NIČ! |       |       |
| 108 | #NIČ! 301945  | #NIČ! | #NIČ! | #NIČ! | #NIČ! | #NIČ! | #NIČ! | #NIČ! | #NIČ! | #NIČ! | #NIČ! | #NIČ! | #NIČ! | #NIČ! | #NIČ! | #NIČ! | #NIČ! | #NIČ! | #NIČ! | #NIČ! | #NIČ! | #NIČ! | #NIČ! | #NIČ! | #NIČ! | #NIČ! | #NIČ!  | #NIČ!     | #NIČ! | #NIČ! | #NIČ! | #NIČ! | #NIČ! | #NIČ! | 34    | #NIČ! |       |
| 109 | #NIČ! 9135759 | #NIČ! | #NIČ! | #NIČ! | #NIČ! | #NIČ! | #NIČ! | #NIČ! | #NIČ! | #NIČ! | #NIČ! | #NIČ! | #NIČ! | #NIČ! | #NIČ! | #NIČ! | #NIČ! | #NIČ! | #NIČ! | #NIČ! | #NIČ! | #NIČ! | #NIČ! | #NIČ! | #NIČ! | #NIČ! | #NIČ!  | #NIČ!     | #NIČ! | #NIČ! | #NIČ! | #NIČ! | #NIČ! | #NIČ! | 34    | #NIČ! |       |
| 110 | 2 4772960     | 4     | 4     | 7     | 6     | 5     | 7     | 5     | 3     | 6     | 6     | 5     | 5     | 4     | 6     | 5     | 1     | 6     | 4     | 4     | 2     | 3     | 4     | 2     | 2     | 5     | 1      | 2         | 2     | 2     | 4,00  | 1,00  | 2,00  | 34    | #NIČ! |       |       |
| 111 | 2 6457522     | 5     | 7     | 6     | 6     | 7     | 5     | 5     | 4     | 2     | 6     | 4     | 2     | 5     | 7     | 4     | 2     | 6     | 4     | 4     | 4     | 2     | 4     | 2     | 2     | 6     | 5      | 1         | 4     | 2     | 3,88  | 5,00  | 3,00  | 34    | #NIČ! |       |       |
| 112 | 2 7968733     | 6     | 7     | 7     | 6     | 7     | 7     | 7     | 7     | 7     | 7     | 7     | 7     | 7     | 6     | 6     | 7     | 3     | 4     | 4     | 3     | 4     | 4     | 3     | 4     | 6     | 6      | 1         | 4     | 2     | 5,76  | 6,00  | 3,00  | 34    | #NIČ! |       |       |
| 113 | 2 471096      | 4     | 6     | 7     | 4     | 4     | 6     | 4     | 4     | 2     | 3     | 4     | 1     | 7     | 5     | 4     | 1     | 7     | 3     | 3     | 3     | 2     | 2     | 3     | 3     | 1     | 2      | 2         | 2     | 3,29  | 1,00  | 2,00  | 34    | #NIČ! |       |       |       |
| 114 | 2 8449284     | 4     | 5     | 5     | 5     | 5     | 5     | 5     | 5     | 5     | 5     | 5     | 5     | 6     | 5     | 6     | 5     | 6     | 4     | 5     | 4     | 3     | 4     | 4     | 4     | 8     | #NIČ!  | 4         | 2     | 2     | 4,12  | #NIČ! | #NIČ! | 34    | #NIČ! |       |       |
| 115 | 2 833132      | 6     | 7     | 7     | 6     | 6     | 7     | 6     | 7     | 7     | 7     | 7     | 7     | 6     | 7     | 7     | 6     | 6     | 5     | 5     | 5     | 5     | 5     | 2     | 3     | 3     | 6      | 2         | 3     | 2     | 5,59  | 6,00  | 3,00  | 34    | #NIČ! |       |       |
| 116 | 2 8817810     | 6     | 6     | 7     | 6     | 6     | 6     | 6     | 5     | 7     | 7     | 6     | 6     | 6     | 6     | 5     | 6     | 7     | 3     | 4     | 4     | 3     | 3     | 3     | 3     | 3     | 1      | 2         | 4     | 2     | 5,12  | 1,00  | 2,00  | 34    | #NIČ! |       |       |
| 117 | 2 1589653     | 6     | 7     | 7     | 6     | 6     | 6     | 6     | 5     | 6     | 7     | 6     | 6     | 6     | 7     | 6     | 5     | 6     | 2     | 5     | 2     | 3     | 3     | 2     | 2     | 5     | 8      | 3         | 4     | 2     | 5,12  | 8,00  | 1,00  | 34    | #NIČ! |       |       |
| 118 | 2 1494837     | 6     | 7     | 7     | 7     | 6     | 7     | 6     | 4     | 4     | 6     | 4     | 7     | 5     | 1     | 5     | 2     | 3     | 3     | 3     | 3     | 3     | 2     | 3     | 3     | 4     | 7      | 2         | 2     | 2     | 4,65  | 7,00  | 4,00  | 34    | #NIČ! |       |       |
| 120 | 2 2705223     | 6     | 6     | 7     | 6     | 5     | 7     | 6     | 5     | 6     | 6     | 7     | 6     | 7     | 7     | 5     | 5     | 4     | 3     | 4     | 4     | 4     | 4     | 4     | 3     | 6     | 1      | 2         | 2     | 2     | 4,94  | 1,00  | 2,00  | 34    | #NIČ! |       |       |
| 121 | 2 9041607     | 6     | 7     | 7     | 6     | 6     | 6     | 6     | 6     | 6     | 7     | 7     | 6     | 6     | 6     | 6     | 4     | 7     | 4     | 5     | 5     | 4     | 5     | 4     | 4     | 2     | #NIČ!  | radiološ  | 1     | 5     | 2     | 5,18  | 98,00 | 7,00  | 16    | 1,00  |       |
| 122 | 2 7092365     | 5     | 7     | 7     | 6     | 5     | 5     | 4     | 4     | 4     | 7     | 4     | 4     | 4     | 7     | 5     | 4     | 6     | 3     | 4     | 3     | 3     | 2     | 3     | 2     | 3     | 17     | 2         | 4     | 2     | 4,18  | 17,00 | 1,00  | 34    | #NIČ! |       |       |
| 123 | 2 8337005     | 6     | 6     | 5     | 5     | 5     | 6     | 6     | 6     | 6     | 5     | 5     | 6     | 6     | 5     | 5     | 2     | 5     | 3     | 3     | 3     | 3     | 3     | 2     | 6     | 4     | 2      | 4         | 2     | 2     | 4,29  | 4,00  | 6,00  | 34    | #NIČ! |       |       |
| 124 | 2 407929      | 6     | 6     | 7     | 5     | 5     | 6     | 5     | 3     | 3     | 4     | 3     | 6     | 4     | 3     | 2     | 1     | 6     | 2     | 3     | 3     | 3     | 2     | 2     | 3     | 2     | 3      | 1         | 5     | 2     | 3,41  | 3,00  | 5,00  | 34    | #NIČ! |       |       |
| 125 | 2 7028631     | 6     | 6     | 6     | 5     | 6     | 6     | 7     | 4     | 7     | 6     | 4     | 5     | 6     | 6     | 6     | 3     | 7     | 3     | 4     | 5     | 5     | 4     | 5     | 5     | 8     | #NIČ!  | #NIČ!     | 5     | 2     | 4,65  | #NIČ! | #NIČ! | 34    | #NIČ! |       |       |
| 126 | 2 3919369     | 6     | 7     | 6     | 6     | 6     | 4     | 6     | 6     | 4     | 7     | 5     | 4     | 7     | 5     | 6     | 4     | 5     | 2     | 5     | 4     | 3     | 3     | 2     | 2     | 3     | 2      | 1         | 5     | 2     | 4,53  | 2,00  | 5,00  | 34    | #NIČ! |       |       |
| 127 | 2 8510950     | 6     | 7     | 7     | 6     | 6     | 6     | 6     | 6     | 7     | 6     | 6     | 6     | 6     | 6     | 6     | 7     | 4     | 3     | 4     | 4     | 4     | 3     | 4     | 6     | 17    | 2      | 2         | 2     | 2     | 5,24  | 17,00 | 1,00  | 34    | #NIČ! |       |       |
| 128 | 2 796647      | 7     | 7     | 7     | 7     | 7     | 7     | 7     | 7     | 7     | 7     | 7     | 7     | 7     | 7     | 7     | 7     | 7     | 5     | 5     | 5     | 5     | 5     | 5     | 5     | 3     | 5      | 1         | 4     | 2     | 6,00  | 5,00  | 3,00  | 34    | #NIČ! |       |       |
| 129 | 2 8450382     | 7     | 7     | 7     | 7     | 6     | 6     | 6     | 6     | 6     | 7     | 3     | 6     | 7     | 7     | 6     | 5     | 6     | 3     | 5     | 4     | 4     | 4     | 4     | 3     | 3     | 17     | 2         | 2     | 2     | 2     | 5,18  | 17,00 | 1,00  | 34    | #NIČ! |       |
| 130 | #NIČ! 9861969 | #NIČ! | #NIČ! | #NIČ! | #NIČ! | #NIČ! | #NIČ! | #NIČ! | #NIČ! | #NIČ! | #NIČ! | #NIČ! | #NIČ! | #NIČ! | #NIČ! | #NIČ! | #NIČ! | #NIČ! | #NIČ! | #NIČ! | #NIČ! | #NIČ! | #NIČ! | #NIČ! | #NIČ! | #NIČ! | #NIČ!  | #NIČ!     | #NIČ! | #NIČ! | #NIČ! | #NIČ! | #NIČ! | #NIČ! | #NIČ! | 34    | #NIČ! |
| 131 | 2 3958702     | 5     | 6     | 7     | 6     | 5     | 5     | 6     | 6     | 6     | 6     | 6     | 6     | 6     | 6     | 5     | 6     | 5     | 5     | 5     | 4     | 5     | 5     | 5     | 3     | 1     | 1      | 5         | 1     | 1     | 4,88  | 1,00  | 2,00  | 34    | #NIČ! |       |       |
| 132 | 2 207601      | 6     | 7     | 7     | 7     | 4     | 6     | 4     | 4     | 6     | 6     | 6     | 6     | 4     | 7     | 4     | 1     | 7     | 4     | 4     | 5     | 5     | 5     | 5     | 2     | 16    | 1      | 5         | 2     | 2     | 4,29  | 16,00 | 1,00  | 34    | #NIČ! |       |       |
| 133 | 2 9161898     | 6     | 7     | 6     | 6     | 6     | 4     | 6     | 6     | 6     | 7     | 6     | 5     | 6     | 6     | 6     | 4     | 7     | 4     | 5     | 5     | 5     | 4     | 5     | 5     | 8     | #NIČ!  | Uprava    | 5     | 6     | 1     | 4,88  | 98,00 | 7,00  | 27    | 1,00  |       |
| 134 | 2 5186689     | 6     | 7     | 7     | 7     | 7     | 7     | 6     | 7     | 7     | 7     | 7     | 7     | 7     | 6     | 6     | 7     | 3     | 4     | 4     | 4     | 4     | 2     | 3     | 4     | 6     | 2      | 4         | 2     | 2     | 5,76  | 6,00  | 3,00  | 34    | #NIČ! |       |       |
| 135 | 2 8447751     | 4     | 6     | 5     | 5     | 4     | 6     | 4     | 3     | 3     | 6     | 5     | 3     | 6     | 6     | 5     | 4     | 6     | 2     | 4     | 4     | 4     | 3     | 4     | 3     | 6     | 9      | 3         | 4     | 2     | 3,76  | 9,00  | 1,00  | 34    | #NIČ! |       |       |
| 136 | 2 6678687     | 6     | 6     | 6     | 6     | 6     | 7     | 6     | 6     | 6     | 7     | 6     | 6     | 7     | 6     | 5     | 6     | 3     | 5     | 5     | 3     | 4     | 4     | 3     | 3     | 14    | 2      | 4         | 2     | 2     | 5,18  | 14,00 | 1,00  | 34    | #NIČ! |       |       |
| 137 | 2 8050183     | 7     | 7     | 7     | 6     | 6     | 7     | 7     | 6     | 6     | 6     | 6     | 6     | 6     | 6     | 2     | 6     | 2     | 5     | 5     | 5     | 4     | 4     | 4     | 6     | 6     | #NIČ!  | dso AMI   | 1     | 5     | 2     | 5,12  | 98,00 | 7,00  | 7     | 1,00  |       |
| 138 | 2 214854      | 6     | 7     | 7     | 6     | 6     | 6     | 5     | 6     | 4     | 6     | 5     | 4     | 4     | 6     | 6     | 3     | 7     | 2     | 5     | 5     | 3     | 3     | 3     | 1     | 2     | 1      | 5         | 2     | 2     | 4,53  | 2,00  | 5,00  | 34    | #NIČ! |       |       |
| 139 | 2 6923724     | 4     | 4     | 7     | 7     | 7     | 4     | 3     | 4     | 7     | 7     | 6     | 6     | 7     | 7     | 4     | 5     | 3     | 3     | 3     | 3     | 3     | 3     | 2     | 2     | 2     | 2      | 2         | 2     | 2     | 2     | 4,65  | 17,00 | 1,00  | 34    | #NIČ! |       |
| 140 | 2 3974055     | 4     | 5     | 3     | 4     | 4     | 5     | 4     | 4     | 4     | 5     | 4     | 4     | 3     | 5     | 6     | 3     | 5     | 2     | 5     | 3     | 3     | 3     | 2     | 2     | 6     | 1      | 2         | 4     | 2     | 3,24  | 1,00  | 2,00  | 34    | #NIČ! |       |       |
| 141 | 2 9099106     | 3     | 7     | 7     | 4     | 6     | 2     | 4     | 2     | 3     | 7     | 2     | 4     | 5     | 4     | 4     | 4     | 5     | 2     | 3     | 3     | 3     | 3     | 2     | 6     | 2     | 2      | 2         | 2     | 2     | 3,29  | 2,00  | 5,00  | 34    | #NIČ! |       |       |
| 142 | 2 3573364     | 4     | 6     | 6     | 4     | 5     | 4     | 4     | 3     | 3     | 4     | 5     | 7     | 5     | 6     | 2     | 3     | 6     | 2     | 3     | 3     | 2     | 2     | 2     | 2     | 6     | 12     | 3         | 4     | 2     | 2     | 3,53  | 12,00 | 1,00  | 34    | #NIČ! |       |
| 143 | #NIČ! 569501  | #NIČ! | #NIČ! | #NIČ! | #NIČ! | #NIČ! | #NIČ! | #NIČ! | #NIČ! | #NIČ! | #NIČ! | #NIČ! | #NIČ! | #NIČ! | #NIČ! | #NIČ! | #NIČ! | #NIČ! | #NIČ! | #NIČ! | #NIČ! | #NIČ! | #NIČ! | #NIČ! | #NIČ! | #NIČ! | #NIČ!  | #NIČ!     | #NIČ! | #NIČ! | #NIČ! | #NIČ! | #NIČ! | #NIČ! | #NIČ! | 34    | #NIČ! |
| 144 | 2 2127412     | 6     | 6     | 6     | 5     | 5     | 5     | 5     | 5     | 6     | 4     | 4     | 4     | 5     | 6     | 5     | 4     | 6     | 4     | 3     | 4     | 3     | 4     | 5     | 5     | 4     | 4      | 2         | 2     | 2     | 2     | 4,12  | 4,00  | 6,00  | 34    | #NIČ! |       |
| 145 | 2 8928560     | 6     | 7     | 6     | 7     | 7     | 6     | 7     | 6     | 7     | 7     | 6     | 6     | 6     | 7     | 7     | 4     | 6     | 4     | 5     | 5     | 4     | 4     | 4     | 2     | 5     | 1      | 4         | 2     | 2     | 5,35  | 5,00  | 3,00  | 34    | #NIČ! |       |       |
| 146 | 2 8260565     | 7     | 7     | 7     | 7     | 6     | 7     | 7     | 6     | 7     | 7     | 6     | 6     | 7     | 7     | 6     | 3     | 7     | 5     | 4     | 5     | 5     | 4     | 5     | 5     | 1     | #NIČ!  | tajništvc | 4     | 3     | 2     | 5,47  | 98,00 | 7,00  | 24    | 1,00  |       |
| 147 | 2 4517144     | 6     | 7     | 7     | 7     | 6     | 7     | 6     | 6     | 6     | 6     | 6     | 6     | 6     | 6     | 7     | 6     | 5     | 6     | 4     | 4     | 3     | 4     | 4     | 5     | 5     | 2      | 1         | 1     | 6     | 1     | 5,24  | 1,00  | 2,00  | 34    | #NIČ! |       |
| 148 | 2 7804028     | 4     | 7     | 4     | 4     | 4     | 4     | 4     | 5     | 5     | 6     | 6     | 3     | 4     | 7     | 4     | 5     | 6     | 3     | 3     | 3     | 3     | 3     | 3     | 3     | 4     | 1      | 2         | 2     | 2     | 2     | 3,82  | 1,00  | 2,00  | 34    | #NIČ! |       |
| 149 | #NIČ! 5468705 | #NIČ! | #NIČ! | #NIČ! | #NIČ! | #NIČ! | #NIČ! | #NIČ! | #NIČ! | #NIČ! | #NIČ! | #NIČ! | #NIČ! | #NIČ! | #NIČ! | #NIČ! | #NIČ! | #NIČ! | #NIČ! | #NIČ! | #NIČ! | #NIČ! | #NIČ! | #NIČ! | #NIČ! | #NIČ! | #NIČ!  | #NIČ!     | #NIČ! | #NIČ! | #NIČ! | #NIČ! | #NIČ! | #NIČ! | #NIČ! | 34    | #NIČ! |
| 150 | 2 3931443     | 7     | 7     | 7     | 7     | 7     | 7     | 6     | 5     | 6     | 6     | 6     | 6     | 7     | 6     | 6     | 7     | 2     | 4     | 4     | 5     | 5     | 5     | 5     | 7     | #NIČ! | nmp    | 2         | 4     | 2     | 2     | 5,47  | 98,00 | 7,00  | 14    | 1,00  |       |
| 151 | 2 3251101     | 4     | 5     | 5     | 5     | 5     | 4     | 5     | 4     | 5     | 5     | 4     | 4     | 4     | 6     | 3     | 3     | 6     | 2     | 2     | 2     | 3     | 2     | 3     | 2     | 6     | 9      | 2         | 2     | 2     | 3,53  | 9,00  | 1,00  | 34    | #NIČ! |       |       |
| 152 | 2 4461173     | 6     | 7     | 7     | 6     | 6     | 6     | 6     | 6     | 5     | 6     | 6     | 5     | 6     | 6     | 4     | 4     | 6     | 3     | 5     | 5     | 2     | 3     | 2     | 2     | 6     | 5      | 1         | 5     | 2     | 4,76  | 5,00  | 3,00  | 34    | #NIČ! |       |       |
| 153 | 2 2552566     | 6     | 7     | 7     | 5     | 5     | 6     | 5     | 5     | 4     | 5     | 4     | 3     | 5     | 5     | 5     | 2     | 5     | 4     | 5     | 5     | 4     | 4     | 3     | 3     | 2     | 8      | 3         | 4     | 2     | 3,94  | 8,00  | 1,00  | 34    | #NIČ! |       |       |
| 154 | 2 9379310     | 7     | 7     | 6     | 6     | 7     | 7     | 6     | 6     | 7     | 6     | 7     | 7     | 7     | 6     | 4     | 7     | 4     | 5     | 5     | 5     | 5     | 3     | 4     | 2     | 6     | 2      | 2         | 2     | 2     | 5,47  | 6,00  | 3,00  | 34    | #NIČ! |       |       |
| 155 | 2 9238854     | 6     | 6     | 6     | 6     | 5     | 6     | 5     | 5     | 6     | 7     | 7     | 7     | 6     | 7     | 5     | 7     | 5     | 5     | 5     | 4     | 3     | 5     | 5     | 8     | #NIČ! | Uprava | 5         | 4     | 1     | 5,12  | 98,00 | 7,00  | 27    | 1,00  |       |       |
| 156 | 2 8056341     | 6     | 7     | 7     | 7     | 6     | 7     | 6     | 6     | 7     | 6     | 7     | 7     | 7     | 7     | 7     | 2     | 3     | 3     | 3     | 4     | 3     | 3     | 1     | 4     | 1     | 4      | 1         | 5     | 1     | 5,71  | 4,0   |       |       |       |       |       |

|     |               |       |       |       |       |       |       |       |       |       |       |       |       |       |       |       |       |       |       |       |       |       |       |       |       |       |           |          |       |       |       |       |       |       |       |       |
|-----|---------------|-------|-------|-------|-------|-------|-------|-------|-------|-------|-------|-------|-------|-------|-------|-------|-------|-------|-------|-------|-------|-------|-------|-------|-------|-------|-----------|----------|-------|-------|-------|-------|-------|-------|-------|-------|
| 161 | 2 3085526     | 4     | 5     | 7     | 5     | 6     | 5     | 5     | 4     | 4     | 5     | 5     | 5     | 6     | 5     | 4     | 3     | 5     | 3     | 4     | 4     | 4     | 4     | 4     | 2     | 8     | 3         | 4        | 2     | 3,88  | 8,00  | 1,00  | 34    | #NiČ! |       |       |
| 162 | 2 9517933     | 7     | 7     | 7     | 7     | 7     | 7     | 7     | 7     | 7     | 7     | 7     | 7     | 7     | 7     | 7     | 7     | 5     | 5     | 5     | 5     | 5     | 5     | 5     | 6     | 1     | 2         | 4        | 2     | 6,00  | 1,00  | 2,00  | 34    | #NiČ! |       |       |
| 163 | #NiČ! 8333088 | #NiČ! | #NiČ! | #NiČ! | #NiČ! | #NiČ! | #NiČ! | #NiČ! | #NiČ! | #NiČ! | #NiČ! | #NiČ! | #NiČ! | #NiČ! | #NiČ! | #NiČ! | #NiČ! | #NiČ! | #NiČ! | #NiČ! | #NiČ! | #NiČ! | #NiČ! | #NiČ! | #NiČ! | #NiČ! | #NiČ!     | #NiČ!    | #NiČ! | #NiČ! | #NiČ! | #NiČ! | #NiČ! | #NiČ! | #NiČ! | #NiČ! |
| 164 | 2 3111642     | 6     | 6     | 6     | 5     | 6     | 5     | 5     | 6     | 6     | 6     | 5     | 6     | 6     | 5     | 5     | 4     | 5     | 4     | 4     | 4     | 3     | 4     | 3     | 3     | 1     | 1         | 2        | 2     | 4,47  | 1,00  | 2,00  | 34    | #NiČ! |       |       |
| 165 | 2 558947      | 5     | 4     | 7     | 5     | 5     | 5     | 4     | 4     | 4     | 5     | 4     | 4     | 7     | 6     | 6     | 3     | 7     | 3     | 4     | 5     | 3     | 1     | 4     | 3     | 8     | #NiČ!     | 4        | 3     | 2     | 4,00  | #NiČ! | #NiČ! | 34    | #NiČ! |       |
| 166 | 2 3459810     | 6     | 5     | 5     | 5     | 5     | 4     | 4     | 3     | 4     | 5     | 4     | 5     | 4     | 5     | 4     | 2     | 5     | 3     | 3     | 3     | 3     | 3     | 4     | 12    | 3     | 2         | 2        | 3,41  | 12,00 | 1,00  | 34    | #NiČ! |       |       |       |
| 167 | 1 5622210     | 6     | 7     | 7     | 7     | 7     | 7     | 7     | 7     | 6     | 7     | 6     | 6     | 7     | 6     | 5     | 6     | 3     | 4     | 5     | 3     | 3     | 3     | 2     | #NiČ! | #NiČ! | #NiČ!     | #NiČ!    | #NiČ! | 5,53  | #NiČ! | #NiČ! | 34    | #NiČ! |       |       |
| 168 | 2 7731618     | 6     | 5     | 7     | 5     | 4     | 6     | 5     | 5     | 5     | 5     | 5     | 4     | 6     | 6     | 5     | 4     | 7     | 5     | 5     | 5     | 4     | 5     | 4     | 8     | #NiČ! | Adminis   | 4        | 4     | 2     | 4,29  | 98,00 | 7,00  | 3     | 1,00  |       |
| 169 | 2 1791460     | 7     | 7     | 7     | 7     | 7     | 6     | 6     | 7     | 7     | 7     | 7     | 7     | 7     | 7     | 6     | 6     | 4     | 5     | 5     | 3     | 3     | 4     | 3     | 5     | 14    | 2         | 4        | 1     | 5,76  | 14,00 | 1,00  | 34    | #NiČ! |       |       |
| 170 | 2 5762447     | 5     | 6     | 6     | 6     | 6     | 6     | 6     | 6     | 5     | 6     | 5     | 5     | 6     | 6     | 5     | 5     | 6     | 3     | 4     | 5     | 4     | 3     | 3     | 3     | 2     | 17        | 1        | 4     | 2     | 4,65  | 17,00 | 1,00  | 34    | #NiČ! |       |
| 171 | #NiČ! 3437857 | #NiČ! | #NiČ! | #NiČ! | #NiČ! | #NiČ! | #NiČ! | #NiČ! | #NiČ! | #NiČ! | #NiČ! | #NiČ! | #NiČ! | #NiČ! | #NiČ! | #NiČ! | #NiČ! | #NiČ! | #NiČ! | #NiČ! | #NiČ! | #NiČ! | #NiČ! | #NiČ! | #NiČ! | #NiČ! | #NiČ!     | #NiČ!    | #NiČ! | #NiČ! | #NiČ! | #NiČ! | #NiČ! | #NiČ! | #NiČ! |       |
| 172 | 2 9901943     | 6     | 6     | 7     | 7     | 7     | 5     | 6     | 6     | 6     | 7     | 7     | 7     | 6     | 7     | 4     | 7     | 6     | 4     | 3     | 4     | 4     | 4     | 5     | 1     | 2     | 2         | 4        | 2     | 5,29  | 2,00  | 5,00  | 34    | #NiČ! |       |       |
| 173 | 2 9196143     | 7     | 7     | 7     | 7     | 7     | 7     | 7     | 7     | 7     | 7     | 7     | 7     | 7     | 7     | 7     | 7     | 3     | 5     | 4     | 5     | 5     | 4     | 4     | 5     | 2     | 17        | 2        | 2     | 5,65  | 17,00 | 1,00  | 34    | #NiČ! |       |       |
| 174 | 2 6274886     | 6     | 7     | 6     | 6     | 6     | 6     | 6     | 6     | 6     | 6     | 5     | 4     | 6     | 6     | 5     | 4     | 5     | 3     | 3     | 3     | 3     | 3     | 3     | 6     | 15    | 3         | 4        | 2     | 4,65  | 15,00 | 1,00  | 34    | #NiČ! |       |       |
| 175 | 2 3786002     | 6     | 6     | 6     | 6     | 4     | 5     | 4     | 3     | 3     | 4     | 6     | 6     | 6     | 5     | 6     | 3     | 4     | 4     | 4     | 3     | 3     | 3     | 3     | 2     | 17    | 1         | 6        | 1     | 3,88  | 17,00 | 1,00  | 34    | #NiČ! |       |       |
| 176 | 2 105355      | 6     | 6     | 7     | 6     | 6     | 7     | 6     | 6     | 6     | 7     | 5     | 6     | 6     | 5     | 6     | 4     | 5     | 3     | 5     | 5     | 5     | 4     | 3     | 3     | 4     | 11        | 3        | 4     | 2     | 4,88  | 11,00 | 1,00  | 34    | #NiČ! |       |
| 177 | 2 9168766     | 6     | 6     | 7     | 6     | 6     | 6     | 6     | 6     | 6     | 6     | 5     | 5     | 6     | 6     | 6     | 5     | 5     | 2     | 3     | 3     | 3     | 2     | 2     | 3     | 1     | 5         | 1        | 4     | 2     | 4,82  | 5,00  | 3,00  | 34    | #NiČ! |       |
| 178 | 2 5527765     | 6     | 7     | 7     | 7     | 7     | 7     | 7     | 7     | 5     | 7     | 5     | 5     | 7     | 7     | 7     | 7     | 3     | 5     | 5     | 3     | 5     | 5     | 3     | 3     | 14    | 5         | 6        | 1     | 5,59  | 14,00 | 1,00  | 34    | #NiČ! |       |       |
| 179 | 2 132526      | 6     | 6     | 6     | 6     | 7     | 7     | 7     | 7     | 6     | 7     | 7     | 7     | 7     | 7     | 7     | 5     | 7     | 3     | 5     | 5     | 4     | 4     | 4     | 3     | 5     | 1         | 5        | 2     | 5,59  | 5,00  | 3,00  | 34    | #NiČ! |       |       |
| 180 | 2 4079338     | 4     | 5     | 5     | 5     | 5     | 5     | 5     | 5     | 5     | 5     | 5     | 5     | 5     | 5     | 6     | 6     | 5     | 5     | 4     | 4     | 4     | 4     | 4     | 4     | 3     | 1         | 2        | 2     | 4,06  | 1,00  | 2,00  | 34    | #NiČ! |       |       |
| 181 | 2 9999112     | 4     | 3     | 4     | 3     | 3     | 4     | 2     | 2     | 2     | 3     | 2     | 3     | 2     | 3     | 4     | 1     | 7     | 2     | 5     | 5     | 3     | 3     | 3     | 3     | 8     | #NiČ!     | adminis' | 4     | 2     | 2     | 2,06  | 98,00 | 7,00  | 1     | 1,00  |
| 182 | 2 7757545     | 6     | 7     | 7     | 7     | 6     | 7     | 6     | 6     | 6     | 7     | 7     | 7     | 7     | 7     | 7     | 7     | 5     | 5     | 3     | 2     | 3     | 4     | 3     | 6     | 1     | 1         | 5        | 2     | 5,71  | 1,00  | 2,00  | 34    | #NiČ! |       |       |
| 183 | #NiČ! 8790390 | #NiČ! | #NiČ! | #NiČ! | #NiČ! | #NiČ! | #NiČ! | #NiČ! | #NiČ! | #NiČ! | #NiČ! | #NiČ! | #NiČ! | #NiČ! | #NiČ! | #NiČ! | #NiČ! | #NiČ! | #NiČ! | #NiČ! | #NiČ! | #NiČ! | #NiČ! | #NiČ! | #NiČ! | #NiČ! | #NiČ!     | #NiČ!    | #NiČ! | #NiČ! | #NiČ! | #NiČ! | #NiČ! | #NiČ! | #NiČ! | #NiČ! |
| 184 | 2 679315      | 4     | 7     | 7     | 7     | 5     | 5     | 4     | 4     | 4     | 7     | 4     | 4     | 7     | 7     | 4     | 7     | 3     | 3     | 3     | 3     | 4     | 3     | 2     | 16    | 2     | 4         | 1        | 4,53  | 16,00 | 1,00  | 34    | #NiČ! |       |       |       |
| 185 | 2 7025406     | 7     | 4     | 7     | 7     | 7     | 7     | 7     | 7     | 7     | 7     | 7     | 7     | 7     | 5     | 3     | 7     | 2     | 5     | 5     | 3     | 3     | 2     | 2     | 6     | 9     | 4         | 2        | 2     | 5,47  | 9,00  | 1,00  | 34    | #NiČ! |       |       |
| 186 | 2 3089085     | 6     | 7     | 7     | 6     | 6     | 3     | 2     | 6     | 5     | 7     | 3     | 4     | 4     | 7     | 4     | 2     | 7     | 4     | 4     | 4     | 3     | 5     | 3     | 1     | #NiČ! | adminis'  | 4        | 2     | 2     | 4,06  | 98,00 | 7,00  | 1     | 1,00  |       |
| 187 | 2 4369205     | 4     | 5     | 5     | 4     | 4     | 4     | 4     | 5     | 4     | 5     | 4     | 4     | 4     | 5     | 3     | 3     | 4     | 2     | 3     | 3     | 1     | 3     | 2     | 2     | 2     | 9         | 3        | 2     | 3,18  | 9,00  | 1,00  | 34    | #NiČ! |       |       |
| 188 | 2 2578773     | 4     | 7     | 7     | 4     | 4     | 5     | 3     | 3     | 7     | 7     | 4     | 4     | 4     | 4     | 3     | 4     | 7     | 2     | 4     | 4     | 3     | 3     | 3     | 3     | 8     | #NiČ!     | Uprava   | 3     | 4     | 2     | 3,76  | 98,00 | 7,00  | 27    | 1,00  |
| 189 | 2 9786248     | 6     | 7     | 7     | 7     | 7     | 6     | 6     | 7     | 6     | 7     | 7     | 7     | 7     | 7     | 6     | 6     | 6     | 2     | 4     | 2     | 1     | 5     | 4     | 3     | 1     | 14        | 2        | 4     | 2     | 5,59  | 14,00 | 1,00  | 34    | #NiČ! |       |
| 190 | #NiČ! 1194922 | #NiČ! | #NiČ! | #NiČ! | #NiČ! | #NiČ! | #NiČ! | #NiČ! | #NiČ! | #NiČ! | #NiČ! | #NiČ! | #NiČ! | #NiČ! | #NiČ! | #NiČ! | #NiČ! | #NiČ! | #NiČ! | #NiČ! | #NiČ! | #NiČ! | #NiČ! | #NiČ! | #NiČ! | #NiČ! | #NiČ!     | #NiČ!    | #NiČ! | #NiČ! | #NiČ! | #NiČ! | #NiČ! | #NiČ! | #NiČ! | #NiČ! |
| 191 | 2 6615866     | 6     | 6     | 7     | 6     | 7     | 6     | 7     | 6     | 6     | 7     | 6     | 6     | 6     | 6     | 5     | 6     | 4     | 5     | 5     | 5     | 4     | 5     | 4     | 1     | 11    | 2         | 2        | 2     | 5,24  | 11,00 | 1,00  | 34    | #NiČ! |       |       |
| 192 | 2 9494566     | 7     | 7     | 7     | 7     | 7     | 7     | 7     | 7     | 6     | 6     | 6     | 6     | 7     | 7     | 6     | 4     | 6     | 5     | 5     | 5     | 5     | 5     | 5     | 5     | 7     | 2         | 4        | 2     | 5,47  | 7,00  | 4,00  | 34    | #NiČ! |       |       |
| 193 | 2 7625229     | 4     | 4     | 4     | 4     | 4     | 4     | 3     | 3     | 3     | 3     | 3     | 4     | 3     | 3     | 3     | 3     | 3     | 3     | 2     | 3     | 3     | 3     | 3     | 6     | 1     | 2         | 2        | 2     | 2,41  | 1,00  | 2,00  | 34    | #NiČ! |       |       |
| 194 | 2 9642450     | 5     | 7     | 7     | 6     | 6     | 6     | 6     | 7     | 7     | 7     | 4     | 6     | 6     | 6     | 5     | 6     | 3     | 5     | 5     | 3     | 4     | 3     | 3     | 3     | 8     | 3         | 4        | 1     | 5,12  | 8,00  | 1,00  | 34    | #NiČ! |       |       |
| 195 | 2 5336564     | 4     | 7     | 4     | 5     | 4     | 3     | 3     | 2     | 3     | 3     | 3     | 3     | 2     | 4     | 5     | 1     | 6     | 3     | 5     | 5     | 3     | 3     | 3     | 6     | #NiČ! | 2         | 2        | 2     | 2,65  | #NiČ! | 1,00  | 34    | #NiČ! |       |       |
| 196 | 2 7755468     | 6     | 6     | 7     | 6     | 6     | 5     | 6     | 5     | 5     | 7     | 6     | 5     | 5     | 7     | 6     | 4     | 7     | 3     | 5     | 5     | 4     | 4     | 4     | 2     | 9     | 3         | 4        | 2     | 4,82  | 9,00  | 1,00  | 34    | #NiČ! |       |       |
| 197 | 2 2767651     | 6     | 7     | 7     | 6     | 6     | 6     | 5     | 5     | 6     | 7     | 6     | 4     | 4     | 6     | 6     | 5     | 6     | 2     | 5     | 5     | 3     | 3     | 3     | 5     | 8     | 3         | 4        | 2     | 4,76  | 8,00  | 1,00  | 34    | #NiČ! |       |       |
| 198 | 2 571851      | 6     | 6     | 7     | 6     | 5     | 7     | 4     | 4     | 2     | 7     | 7     | 4     | 4     | 7     | 4     | 4     | 7     | 2     | 2     | 2     | 2     | 2     | 2     | 2     | 1     | 2         | 3        | 2     | 4,35  | 1,00  | 2,00  | 34    | #NiČ! |       |       |
| 199 | 2 4556301     | 7     | 7     | 7     | 6     | 6     | 5     | 6     | 6     | 6     | 6     | 6     | 2     | 6     | 6     | 5     | 3     | 6     | 2     | 4     | 4     | 4     | 4     | 3     | 3     | 1     | 2         | 2        | 2     | 4,65  | 2,00  | 5,00  | 34    | #NiČ! |       |       |
| 200 | #NiČ! 1065955 | #NiČ! | #NiČ! | #NiČ! | #NiČ! | #NiČ! | #NiČ! | #NiČ! | #NiČ! | #NiČ! | #NiČ! | #NiČ! | #NiČ! | #NiČ! | #NiČ! | #NiČ! | #NiČ! | #NiČ! | #NiČ! | #NiČ! | #NiČ! | #NiČ! | #NiČ! | #NiČ! | #NiČ! | #NiČ! | #NiČ!     | #NiČ!    | #NiČ! | #NiČ! | #NiČ! | #NiČ! | #NiČ! | #NiČ! | #NiČ! | #NiČ! |
| 201 | 2 1660870     | 7     | 7     | 7     | 7     | 6     | 6     | 6     | 6     | 6     | 6     | 6     | 6     | 6     | 6     | 6     | 6     | 4     | 5     | 4     | 3     | 4     | 4     | 3     | 1     | 11    | 1         | 5        | 1     | 5,24  | 11,00 | 1,00  | 34    | #NiČ! |       |       |
| 202 | 2 5106486     | 4     | 4     | 6     | 4     | 3     | 5     | 3     | 4     | 4     | 3     | 5     | 4     | 3     | 4     | 3     | 2     | 3     | 3     | 3     | 3     | 3     | 2     | 2     | 3     | 2     | 2         | 2        | 2     | 2,76  | 3,00  | 5,00  | 34    | #NiČ! |       |       |
| 203 | 2 549821      | 6     | 7     | 7     | 6     | 6     | 6     | 6     | 6     | 6     | 7     | 6     | 7     | 7     | 7     | 6     | 7     | 4     | 5     | 5     | 4     | 4     | 5     | 5     | 2     | 17    | 2         | 4        | 1     | 5,47  | 17,00 | 1,00  | 34    | #NiČ! |       |       |
| 204 | 2 7429647     | 2     | 7     | 4     | 2     | 1     | 1     | 1     | 1     | 1     | 4     | 1     | 1     | 1     | 1     | 4     | 1     | 5     | 1     | 2     | 1     | 1     | 1     | 1     | 1     | 2     | #NiČ!     | 4        | 4     | 2     | 1,24  | #NiČ! | #NiČ! | 34    | #NiČ! |       |
| 205 | #NiČ! 5498774 | #NiČ! | #NiČ! | #NiČ! | #NiČ! | #NiČ! | #NiČ! | #NiČ! | #NiČ! | #NiČ! | #NiČ! | #NiČ! | #NiČ! | #NiČ! | #NiČ! | #NiČ! | #NiČ! | #NiČ! | #NiČ! | #NiČ! | #NiČ! | #NiČ! | #NiČ! | #NiČ! | #NiČ! | #NiČ! | #NiČ!     | #NiČ!    | #NiČ! | #NiČ! | #NiČ! | #NiČ! | #NiČ! | #NiČ! | #NiČ! | #NiČ! |
| 206 | 2 5204928     | 2     | 7     | 6     | 6     | 3     | 3     | 2     | 2     | 4     | 5     | 1     | 1     | 3     | 1     | 1     | 1     | 2     | 2     | 3     | 2     | 1     | 2     | 1     | 1     | 4     | #NiČ!     | 4        | 1     | 2     | 1,94  | #NiČ! | #NiČ! | 34    | #NiČ! |       |
| 207 | 2 9528320     | 4     | 7     | 7     | 5     | 7     | 7     | 7     | 5     | 6     | 7     | 6     | 6     | 5     | 6     | 4     | 4     | 7     | 2     | 4     | 5     | 3     | 5     | 3     | 4     | 2     | 5         | 1        | 4     | 2     | 4,88  | 5,00  | 3,00  | 34    | #NiČ! |       |
| 208 | 2 2026814     | 4     | 5     | 6     | 6     | 4     | 5     | 5     | 4     | 4     | 6     | 5     | 4     | 6     | 5     | 4     | 1     | 4     | 3     | 3     | 2     | 3     | 3     | 2     | 2     | 2     | 1         | 2        | 2     | 2     | 3,59  | 1,00  | 2,00  | 34    | #NiČ! |       |
| 210 | #NiČ! 1549111 | #NiČ! | #NiČ! | #NiČ! | #NiČ! | #NiČ! | #NiČ! | #NiČ! | #NiČ! | #NiČ! | #NiČ! | #NiČ! | #NiČ! | #NiČ! | #NiČ! | #NiČ! | #NiČ! | #NiČ! | #NiČ! | #NiČ! | #NiČ! | #NiČ! | #NiČ! | #NiČ! | #NiČ! | #NiČ! | #NiČ!     | #NiČ!    | #NiČ! | #NiČ! | #NiČ! | #NiČ! | #NiČ! | #NiČ! | #NiČ! | #NiČ! |
| 211 | 2 1665112     | 6     | 6     | 6     | 6     | 6     | 5     | 6     | 6     | 6     | 6     | 5     | 6     | 6     | 6     | 5     | 4     | 5     | 3     | 5     | 4     | 4     | 4     | 4     | 1     | #NiČ! | specialis | 2        | 4     | 1     | 4,65  | 98,00 | 7,00  | 22    | 1,00  |       |
| 212 | 2 3678228     | 6     | 6     | 7     | 6     | 5     | 6     | 6     | 5     | 5     | 6     | 6     | 4     | 5     | 7     | 6     | 4     | 7     | 2     | 4     | 3     | 2     | 2     | 2     | 4     | 5</   |           |          |       |       |       |       |       |       |       |       |

|     |               |       |       |       |       |       |       |       |       |       |       |       |       |       |       |       |       |       |       |       |       |       |       |       |       |                |              |               |       |       |       |       |       |       |       |       |
|-----|---------------|-------|-------|-------|-------|-------|-------|-------|-------|-------|-------|-------|-------|-------|-------|-------|-------|-------|-------|-------|-------|-------|-------|-------|-------|----------------|--------------|---------------|-------|-------|-------|-------|-------|-------|-------|-------|
| 216 | 2 9838321     | 5     | 7     | 6     | 5     | 4     | 6     | 3     | 3     | 4     | 4     | 5     | 5     | 3     | 5     | 3     | 1     | 5     | 3     | 3     | 3     | 3     | 3     | 4     | 2     | 1              | 1            | 2             | 2     | 2     | 3,35  | 1,00  | 2,00  | 34    | #NIČ! |       |
| 217 | 2 588809      | 7     | 6     | 7     | 7     | 6     | 6     | 6     | 6     | 7     | 6     | 6     | 6     | 6     | 4     | 4     | 7     | 3     | 5     | 5     | 3     | 3     | 2     | 5     | 8     | #NIČ! frs      | 4            | 2             | 2     | 5,06  | 98,00 | 7,00  | 10    | 1,00  |       |       |
| 218 | 2 3429083     | 6     | 7     | 7     | 7     | 7     | 7     | 6     | 6     | 6     | 6     | 7     | 7     | 6     | 6     | 6     | 7     | 4     | 4     | 4     | 4     | 3     | 4     | 3     | 5     | 7              | 2            | 4             | 2     | 5,53  | 7,00  | 4,00  | 34    | #NIČ! |       |       |
| 219 | 2 5378988     | 6     | 6     | 6     | 6     | 6     | 6     | 6     | 6     | 6     | 6     | 6     | 6     | 6     | 5     | 5     | 6     | 3     | 3     | 3     | 3     | 3     | 3     | 3     | 4     | 6              | 2            | 2             | 2     | 4,88  | 6,00  | 3,00  | 34    | #NIČ! |       |       |
| 220 | 2 6607691     | 6     | 7     | 7     | 6     | 5     | 6     | 4     | 3     | 5     | 4     | 6     | 6     | 7     | 4     | 4     | 3     | 4     | 2     | 5     | 5     | 5     | 3     | 4     | 3     | 3              | 1            | 1             | 5     | 2     | 4,12  | 1,00  | 2,00  | 34    | #NIČ! |       |
| 221 | #NIČ! 6901490 | #NIČ! | #NIČ! | #NIČ! | #NIČ! | #NIČ! | #NIČ! | #NIČ! | #NIČ! | #NIČ! | #NIČ! | #NIČ! | #NIČ! | #NIČ! | #NIČ! | #NIČ! | #NIČ! | #NIČ! | #NIČ! | #NIČ! | #NIČ! | #NIČ! | #NIČ! | #NIČ! | #NIČ! | #NIČ!          | #NIČ!        | #NIČ!         | #NIČ! | #NIČ! | #NIČ! | #NIČ! | #NIČ! | #NIČ! | #NIČ! | #NIČ! |
| 222 | 2 4684380     | 6     | 6     | 7     | 6     | 7     | 7     | 7     | 6     | 7     | 7     | 6     | 7     | 7     | 6     | 6     | 6     | 4     | 4     | 4     | 4     | 4     | 3     | 4     | 6     | 20             | 1            | 5             | 1     | 5,47  | 20,00 | 1,00  | 34    | #NIČ! |       |       |
| 223 | 2 2717430     | 6     | 6     | 7     | 7     | 6     | 6     | 6     | 6     | 7     | 7     | 7     | 6     | 5     | 7     | 6     | 5     | 6     | 2     | 3     | 4     | 2     | 3     | 3     | 2     | 4              | 12           | 3             | 4     | 2     | 5,24  | 12,00 | 1,00  | 34    | #NIČ! |       |
| 224 | 2 9534009     | 6     | 6     | 6     | 5     | 5     | 6     | 4     | 4     | 4     | 5     | 5     | 6     | 4     | 3     | 5     | 1     | 7     | 4     | 5     | 5     | 3     | 4     | 5     | 3     | 6              | 1            | 1             | 5     | 2     | 3,82  | 1,00  | 2,00  | 34    | #NIČ! |       |
| 225 | 1 9517756     | 6     | 7     | 7     | 7     | 6     | 6     | #NIČ! | #NIČ! | #NIČ! | #NIČ! | #NIČ! | #NIČ! | #NIČ! | #NIČ! | #NIČ! | #NIČ! | #NIČ! | #NIČ! | #NIČ! | #NIČ! | #NIČ! | #NIČ! | #NIČ! | #NIČ! | #NIČ!          | #NIČ!        | #NIČ!         | #NIČ! | #NIČ! | #NIČ! | #NIČ! | #NIČ! | #NIČ! | #NIČ! | #NIČ! |
| 226 | 2 8986753     | 4     | 5     | 5     | 5     | 6     | 6     | 6     | 5     | 5     | 5     | 5     | 5     | 6     | 6     | 6     | 4     | 6     | 3     | 3     | 4     | 4     | 4     | 3     | 3     | 2              | 16           | 2             | 2     | 2     | 4,29  | 16,00 | 1,00  | 34    | #NIČ! |       |
| 227 | #NIČ! 6380496 | #NIČ! | #NIČ! | #NIČ! | #NIČ! | #NIČ! | #NIČ! | #NIČ! | #NIČ! | #NIČ! | #NIČ! | #NIČ! | #NIČ! | #NIČ! | #NIČ! | #NIČ! | #NIČ! | #NIČ! | #NIČ! | #NIČ! | #NIČ! | #NIČ! | #NIČ! | #NIČ! | #NIČ! | #NIČ!          | #NIČ!        | #NIČ!         | #NIČ! | #NIČ! | #NIČ! | #NIČ! | #NIČ! | #NIČ! | #NIČ! | #NIČ! |
| 228 | 2 4942223     | 6     | 7     | 7     | 7     | 7     | 7     | 7     | 7     | 6     | 7     | 7     | 7     | 7     | 7     | 7     | 7     | 4     | 5     | 5     | 4     | 4     | 2     | 2     | 4     | 5              | 2            | 2             | 2     | 5,88  | 5,00  | 3,00  | 34    | #NIČ! |       |       |
| 229 | 2 5569628     | 6     | 7     | 7     | 6     | 6     | 6     | 5     | 6     | 6     | 6     | 6     | 6     | 6     | 6     | 6     | 6     | 5     | 4     | 4     | 4     | 4     | 4     | 5     | 1     | 1              | 4            | 2             | 2     | 5,06  | 1,00  | 2,00  | 34    | #NIČ! |       |       |
| 230 | 2 3021468     | 5     | 7     | 6     | 6     | 6     | 6     | 5     | 5     | 6     | 7     | 7     | 5     | 5     | 7     | 5     | 5     | 7     | 2     | 4     | 4     | 4     | 3     | 4     | 3     | 1              | 15           | 2             | 1     | 2     | 4,88  | 15,00 | 1,00  | 34    | #NIČ! |       |
| 231 | 0 8398460     | #NIČ! | #NIČ! | #NIČ! | #NIČ! | #NIČ! | #NIČ! | #NIČ! | #NIČ! | #NIČ! | #NIČ! | #NIČ! | #NIČ! | #NIČ! | #NIČ! | #NIČ! | #NIČ! | #NIČ! | #NIČ! | #NIČ! | #NIČ! | #NIČ! | #NIČ! | #NIČ! | #NIČ! | #NIČ!          | #NIČ!        | #NIČ!         | #NIČ! | #NIČ! | #NIČ! | #NIČ! | #NIČ! | #NIČ! | #NIČ! | #NIČ! |
| 232 | 2 2927895     | 6     | 6     | 7     | 6     | 6     | 7     | 5     | 4     | 5     | 6     | 7     | 6     | 6     | 7     | 5     | 5     | 7     | 2     | 5     | 5     | 5     | 3     | 4     | 4     | 6              | 6            | 1             | 4     | 2     | 4,94  | 6,00  | 3,00  | 34    | #NIČ! |       |
| 233 | 2 9444097     | 3     | 3     | 6     | 4     | 4     | 5     | 3     | 2     | 1     | 2     | 4     | 3     | 4     | 3     | 2     | 2     | 6     | 2     | 4     | 4     | 4     | 5     | 3     | 2     | 2              | 16           | 2             | 2     | 2,35  | 16,00 | 1,00  | 34    | #NIČ! |       |       |
| 234 | #NIČ! 8436798 | #NIČ! | #NIČ! | #NIČ! | #NIČ! | #NIČ! | #NIČ! | #NIČ! | #NIČ! | #NIČ! | #NIČ! | #NIČ! | #NIČ! | #NIČ! | #NIČ! | #NIČ! | #NIČ! | #NIČ! | #NIČ! | #NIČ! | #NIČ! | #NIČ! | #NIČ! | #NIČ! | #NIČ! | #NIČ!          | #NIČ!        | #NIČ!         | #NIČ! | #NIČ! | #NIČ! | #NIČ! | #NIČ! | #NIČ! | #NIČ! | #NIČ! |
| 235 | 2 3851700     | 6     | 7     | 6     | 6     | 6     | 5     | 6     | 6     | 6     | 7     | 6     | 6     | 6     | 7     | 6     | 6     | 4     | 5     | 5     | 4     | 4     | 4     | 4     | 2     | 9              | 3            | 3             | 2     | 5,12  | 9,00  | 1,00  | 34    | #NIČ! |       |       |
| 236 | 2 3948106     | 7     | 7     | 7     | 7     | 6     | 6     | 6     | 6     | 7     | 7     | 6     | 5     | 6     | 7     | 7     | 6     | 6     | 3     | 5     | 5     | 5     | 3     | 3     | 3     | 3              | #NIČ!        | 4             | 3     | 2     | 5,41  | #NIČ! | #NIČ! | 34    | #NIČ! |       |
| 237 | 2 8185429     | 6     | 6     | 6     | 6     | 6     | 6     | 6     | 6     | 6     | 6     | 6     | 6     | 6     | 6     | 6     | 6     | 6     | 3     | 3     | 3     | 3     | 2     | 2     | 2     | 8              | #NIČ!        | 4             | 2     | 2     | 5,00  | #NIČ! | #NIČ! | 34    | #NIČ! |       |
| 238 | #NIČ! 9082827 | #NIČ! | #NIČ! | #NIČ! | #NIČ! | #NIČ! | #NIČ! | #NIČ! | #NIČ! | #NIČ! | #NIČ! | #NIČ! | #NIČ! | #NIČ! | #NIČ! | #NIČ! | #NIČ! | #NIČ! | #NIČ! | #NIČ! | #NIČ! | #NIČ! | #NIČ! | #NIČ! | #NIČ! | #NIČ!          | #NIČ!        | #NIČ!         | #NIČ! | #NIČ! | #NIČ! | #NIČ! | #NIČ! | #NIČ! | #NIČ! | #NIČ! |
| 239 | 2 857849      | 6     | 6     | 6     | 6     | 6     | 5     | 2     | 2     | 6     | 6     | 1     | 6     | 5     | 4     | 2     | 6     | 3     | 4     | 4     | 3     | 4     | 4     | 4     | 3     | 1              | 1            | 5             | 2     | 3,76  | 1,00  | 2,00  | 34    | #NIČ! |       |       |
| 240 | 2 7040764     | 3     | 5     | 7     | 4     | 3     | 7     | 3     | 1     | 1     | 1     | 5     | 6     | 4     | 4     | 2     | 4     | 2     | 4     | 4     | 3     | 3     | 3     | 2     | 6     | 1              | 2            | 2             | 2     | 2,76  | 1,00  | 2,00  | 34    | #NIČ! |       |       |
| 241 | #NIČ! 2630275 | #NIČ! | #NIČ! | #NIČ! | #NIČ! | #NIČ! | #NIČ! | #NIČ! | #NIČ! | #NIČ! | #NIČ! | #NIČ! | #NIČ! | #NIČ! | #NIČ! | #NIČ! | #NIČ! | #NIČ! | #NIČ! | #NIČ! | #NIČ! | #NIČ! | #NIČ! | #NIČ! | #NIČ! | #NIČ!          | #NIČ!        | #NIČ!         | #NIČ! | #NIČ! | #NIČ! | #NIČ! | #NIČ! | #NIČ! | #NIČ! | #NIČ! |
| 242 | 2 2029082     | 4     | 5     | 5     | 4     | 3     | 6     | 5     | 3     | 5     | 3     | 5     | 5     | 3     | 4     | 3     | 3     | 5     | 2     | 5     | 3     | 3     | 4     | 3     | 3     | 6              | 2            | 1             | 5     | 2     | 3,18  | 2,00  | 5,00  | 34    | #NIČ! |       |
| 243 | 2 2254587     | 6     | 7     | 7     | 7     | 7     | 7     | 6     | 6     | 6     | 7     | 7     | 7     | 7     | 7     | 7     | 6     | 7     | 4     | 5     | 5     | 5     | 5     | 5     | 3     | #NIČ! zd fužin | 2            | 2             | 2     | 5,71  | 98,00 | 7,00  | 33    | 1,00  |       |       |
| 244 | 2 5185687     | 5     | 7     | 7     | 6     | 6     | 5     | 5     | 5     | 6     | 6     | 4     | 4     | 7     | 5     | 4     | 4     | 7     | 2     | 3     | 3     | 3     | 3     | 2     | 2     | 4              | 3            | 1             | 4     | 2     | 4,47  | 3,00  | 5,00  | 34    | #NIČ! |       |
| 245 | 2 9164673     | 7     | 7     | 7     | 7     | 7     | 7     | 7     | 7     | 7     | 7     | 7     | 7     | 7     | 7     | 7     | 7     | 7     | 2     | 5     | 5     | 5     | 5     | 5     | 6     | 1              | 1            | 5             | 1     | 6,00  | 1,00  | 2,00  | 34    | #NIČ! |       |       |
| 246 | 2 266307      | 6     | 7     | 7     | 7     | 7     | 5     | 5     | 5     | 7     | 5     | 7     | 7     | 7     | 7     | 7     | 5     | 7     | 3     | 4     | 4     | 3     | 4     | 4     | 3     | 26             | 2            | 2             | 1     | 5,35  | 26,00 | 1,00  | 34    | #NIČ! |       |       |
| 247 | 2 3837514     | 7     | 7     | 7     | 7     | 7     | 4     | 5     | 5     | 4     | 6     | 5     | 7     | 7     | 7     | 4     | 1     | 7     | 3     | 3     | 3     | 3     | 2     | 2     | 2     | 1              | 1            | 2             | 2     | 4,71  | 1,00  | 2,00  | 34    | #NIČ! |       |       |
| 248 | 2 8388649     | 5     | 6     | 6     | 5     | 5     | 5     | 5     | 4     | 6     | 6     | 4     | 6     | 6     | 5     | 6     | 4     | 5     | 3     | 4     | 4     | 4     | 4     | 4     | 3     | 4              | 14           | 2             | 4     | 2     | 4,24  | 14,00 | 1,00  | 34    | #NIČ! |       |
| 249 | 2 430703      | 7     | 4     | 7     | 1     | 3     | 1     | 3     | 4     | 5     | 3     | 3     | 4     | 3     | 3     | 5     | 1     | 5     | 3     | 2     | 3     | 3     | 2     | 3     | 2     | 2              | #NIČ!        | 4             | 2     | 2     | 2,65  | #NIČ! | #NIČ! | 34    | #NIČ! |       |
| 250 | 2 6987569     | 6     | 7     | 7     | 7     | 6     | 6     | 6     | 6     | 6     | 7     | 6     | 6     | 6     | 7     | 7     | 7     | 7     | 4     | 5     | 4     | 5     | 4     | 4     | 4     | 6              | 21           | 1             | 6     | 1     | 5,47  | 21,00 | 1,00  | 34    | #NIČ! |       |
| 251 | 2 3645735     | 5     | 3     | 4     | 4     | 4     | 7     | 4     | 4     | 7     | 7     | 7     | 4     | 4     | 7     | 3     | 1     | 7     | 3     | 3     | 3     | 3     | 3     | 3     | 3     | 1              | #NIČ!        | 4             | #NIČ! | 2     | 3,82  | #NIČ! | #NIČ! | 34    | #NIČ! |       |
| 252 | #NIČ! 7265970 | #NIČ! | #NIČ! | #NIČ! | #NIČ! | #NIČ! | #NIČ! | #NIČ! | #NIČ! | #NIČ! | #NIČ! | #NIČ! | #NIČ! | #NIČ! | #NIČ! | #NIČ! | #NIČ! | #NIČ! | #NIČ! | #NIČ! | #NIČ! | #NIČ! | #NIČ! | #NIČ! | #NIČ! | #NIČ!          | #NIČ!        | #NIČ!         | #NIČ! | #NIČ! | #NIČ! | #NIČ! | #NIČ! | #NIČ! | #NIČ! | #NIČ! |
| 253 | 2 5392646     | 6     | 7     | 4     | 6     | 5     | 6     | 5     | 5     | 7     | 7     | 5     | 7     | 4     | 6     | 6     | 3     | 7     | 5     | 4     | 5     | 5     | 5     | 5     | 3     | 1              | 2            | 2             | 6     | 2     | 4,65  | 1,00  | 2,00  | 34    | #NIČ! |       |
| 254 | 2 5165321     | 6     | 7     | 6     | 6     | 6     | 5     | 7     | 6     | 7     | 7     | 6     | 6     | 7     | 7     | 5     | 4     | 5     | 3     | 4     | 5     | 3     | 3     | 3     | 3     | 1              | 11           | 3             | 3     | 2     | 5,06  | 11,00 | 1,00  | 34    | #NIČ! |       |
| 255 | 2 9648667     | 6     | 7     | 7     | 7     | 6     | 7     | 7     | 6     | 7     | 7     | 7     | 7     | 6     | 5     | 6     | 4     | 6     | 4     | 5     | 5     | 4     | 3     | 2     | 3     | 1              | 6            | 1             | 3     | 2     | 5,35  | 6,00  | 3,00  | 34    | #NIČ! |       |
| 256 | #NIČ! 2747373 | #NIČ! | #NIČ! | #NIČ! | #NIČ! | #NIČ! | #NIČ! | #NIČ! | #NIČ! | #NIČ! | #NIČ! | #NIČ! | #NIČ! | #NIČ! | #NIČ! | #NIČ! | #NIČ! | #NIČ! | #NIČ! | #NIČ! | #NIČ! | #NIČ! | #NIČ! | #NIČ! | #NIČ! | #NIČ!          | #NIČ!        | #NIČ!         | #NIČ! | #NIČ! | #NIČ! | #NIČ! | #NIČ! | #NIČ! | #NIČ! | #NIČ! |
| 258 | 2 4790865     | 5     | 7     | 7     | 6     | 6     | 6     | 5     | 5     | 4     | 7     | 7     | 7     | 7     | 6     | 6     | 5     | 7     | 3     | 3     | 3     | 3     | 3     | 3     | 6     | 6              | 2            | 2             | 2     | 5,06  | 6,00  | 3,00  | 34    | #NIČ! |       |       |
| 260 | 2 4188439     | 6     | 7     | 7     | 7     | 7     | 7     | 7     | 7     | 7     | 7     | 7     | 7     | 7     | 6     | 5     | 6     | 7     | 3     | 3     | 3     | 3     | 3     | 3     | 3     | 7              | 2            | 2             | 2     | 5,71  | 7,00  | 4,00  | 34    | #NIČ! |       |       |
| 261 | 2 3805575     | 7     | 7     | 7     | 7     | 7     | 7     | 7     | 7     | 7     | 7     | 7     | 7     | 7     | 7     | 7     | 7     | 5     | 5     | 5     | 5     | 5     | 5     | 5     | 5     | 8              | #NIČ! uprava | 5             | 4     | 1     | 6,00  | 98,00 | 7,00  | 26    | 1,00  |       |
| 262 | 2 6462557     | 6     | 6     | 7     | 6     | 6     | 5     | 6     | 6     | 7     | 7     | 4     | 6     | 7     | 6     | 4     | 6     | 3     | 3     | 3     | 3     | 3     | 5     | 5     | 3     | 2              | 2            | 3             | 2     | 5,00  | 2,00  | 5,00  | 34    | #NIČ! |       |       |
| 263 | 2 5712207     | 5     | 7     | 7     | 5     | 7     | 7     | 6     | 5     | 6     | 6     | 6     | 6     | 6     | 6     | 4     | 5     | 6     | 3     | 3     | 3     | 5     | 5     | 5     | 5     | 6              | 6            | 2             | 2     | 2     | 4,88  | 6,00  | 3,00  | 34    | #NIČ! |       |
| 264 | 2 896060      | 7     | 7     | 7     | 7     | 7     | 4     | 3     | 3     | 6     | 6     | 6     | 6     | 6     | 5     | 6     | 7     | 5     | 4     | 5     | 3     | 3     | 2     | 3     | 3     | 6              | 1            | 4             | 2     | 4,88  | 6,00  | 3,00  | 34    | #NIČ! |       |       |
| 265 | 0 5092628     | #NIČ! | #NIČ! | #NIČ! | #NIČ! | #NIČ! | #NIČ! | #NIČ! | #NIČ! | #NIČ! | #NIČ! | #NIČ! | #NIČ! | #NIČ! | #NIČ! | #NIČ! | #NIČ! | #NIČ! | #NIČ! | #NIČ! | #NIČ! | #NIČ! | #NIČ! | #NIČ! | #NIČ! | #NIČ!          | #NIČ!        | #NIČ!         | #NIČ! | #NIČ! | #NIČ! | #NIČ! | #NIČ! | #NIČ! | #NIČ! | #NIČ! |
| 266 | 2 2774963     | 6     | 6     | 6     | 5     | 5     | 6     | 6     | 6     | 6     | 6     | 6     | 6     | 6     | 6     | 5     | 6     | 3     | 4     | 4     | 3     | 4     | 3     | 3     | 2     | 9              | 3            | 3             | 2     | 4,82  | 9,00  | 1,00  | 34    | #NIČ! |       |       |
| 267 | 2 8596932     | 6     | 7     | 7     | 7     | 7     | 6     | 7     | 7     | 7     | 7     | 4     | 5     | 5     | 7     | 7     | 4     | 7     | 5     | 5     | 5     | 5     | 4     | 4     | 3     | 8              | 3            | #NIČ! visokoš | 2     | 5,29  | 8,00  | 1,00  | 34    | #NIČ! |       |       |
| 268 | 2 4659772     | 6     |       |       |       |       |       |       |       |       |       |       |       |       |       |       |       |       |       |       |       |       |       |       |       |                |              |               |       |       |       |       |       |       |       |       |

|     |               |       |       |       |       |       |       |       |       |       |       |       |       |       |       |       |       |       |       |       |       |       |       |       |       |       |                 |       |       |       |       |       |       |       |       |       |       |
|-----|---------------|-------|-------|-------|-------|-------|-------|-------|-------|-------|-------|-------|-------|-------|-------|-------|-------|-------|-------|-------|-------|-------|-------|-------|-------|-------|-----------------|-------|-------|-------|-------|-------|-------|-------|-------|-------|-------|
| 272 | 2 5721149     | 6     | 6     | 7     | 6     | 6     | 6     | 5     | 6     | 6     | 6     | 5     | 5     | 6     | 6     | 6     | 1     | 6     | 2     | 4     | 4     | 4     | 4     | 3     | 3     | 4     | 1               | 2     | 4     | 2     | 4,59  | 1,00  | 2,00  | 34    | #NIČ! |       |       |
| 273 | #NIČ! 2763249 | #NIČ! | #NIČ! | #NIČ! | #NIČ! | #NIČ! | #NIČ! | #NIČ! | #NIČ! | #NIČ! | #NIČ! | #NIČ! | #NIČ! | #NIČ! | #NIČ! | #NIČ! | #NIČ! | #NIČ! | #NIČ! | #NIČ! | #NIČ! | #NIČ! | #NIČ! | #NIČ! | #NIČ! | #NIČ! | #NIČ!           | #NIČ! | #NIČ! | #NIČ! | #NIČ! | #NIČ! | #NIČ! | #NIČ! | #NIČ! | #NIČ! | #NIČ! |
| 274 | #NIČ! 6652797 | #NIČ! | #NIČ! | #NIČ! | #NIČ! | #NIČ! | #NIČ! | #NIČ! | #NIČ! | #NIČ! | #NIČ! | #NIČ! | #NIČ! | #NIČ! | #NIČ! | #NIČ! | #NIČ! | #NIČ! | #NIČ! | #NIČ! | #NIČ! | #NIČ! | #NIČ! | #NIČ! | #NIČ! | #NIČ! | #NIČ!           | #NIČ! | #NIČ! | #NIČ! | #NIČ! | #NIČ! | #NIČ! | #NIČ! | #NIČ! | #NIČ! |       |
| 275 | 2 4974238     | 6     | 6     | 7     | 6     | 6     | 7     | 6     | 6     | 7     | 6     | 7     | 6     | 7     | 7     | 6     | 4     | 6     | 2     | 5     | 3     | 3     | 3     | 2     | 2     | 3     | 11              | 3     | 4     | 2     | 5,24  | 11,00 | 1,00  | 34    | #NIČ! |       |       |
| 276 | 2 4912798     | 4     | 4     | 6     | 5     | 6     | 6     | 5     | 5     | 4     | 4     | 4     | 3     | 3     | 6     | 4     | 2     | 4     | 2     | 2     | 2     | 2     | 3     | 2     | 2     | 6     | 2               | 2     | 4     | 2     | 3,41  | 2,00  | 5,00  | 34    | #NIČ! |       |       |
| 277 | 2 9641275     | 5     | 4     | 7     | 5     | 4     | 3     | 4     | 2     | 4     | 4     | 3     | 6     | 4     | 6     | 5     | 5     | 6     | 1     | 3     | 3     | 3     | 2     | 3     | 3     | 6     | #NIČ!           | 1     | 5     | 1     | 3,53  | #NIČ! | 1,00  | 34    | #NIČ! |       |       |
| 278 | 2 3467985     | 6     | 7     | 7     | 6     | 6     | 6     | 6     | 6     | 6     | 7     | 6     | 6     | 6     | 6     | 5     | 5     | 6     | 3     | 3     | 3     | 3     | 3     | 3     | 3     | 6     | 1               | 1     | 5     | 1     | 5,06  | 1,00  | 2,00  | 34    | #NIČ! |       |       |
| 279 | 2 8416099     | 6     | 7     | 6     | 5     | 6     | 6     | 6     | 6     | 6     | 6     | 6     | 6     | 6     | 6     | 5     | 2     | 7     | 2     | 5     | 5     | 4     | 4     | 3     | 3     | 1     | 6               | 1     | 5     | 2     | 4,76  | 6,00  | 3,00  | 34    | #NIČ! |       |       |
| 280 | 2 1676539     | 5     | 6     | 6     | 6     | 6     | 6     | 5     | 6     | 6     | 7     | 6     | 7     | 6     | 5     | 6     | 6     | 6     | 4     | 3     | 3     | 3     | 3     | 4     | 3     | 4     | 2               | 1     | 5     | 2     | 4,94  | 2,00  | 5,00  | 34    | #NIČ! |       |       |
| 281 | 2 3134398     | 5     | 6     | 7     | 6     | 6     | 6     | 6     | 4     | 5     | 6     | 5     | 6     | 6     | 6     | 5     | 5     | 7     | 5     | 5     | 5     | 3     | 4     | 3     | 2     | 6     | #NIČ!           | 3     | 2     | 2     | 4,71  | #NIČ! | 1,00  | 34    | #NIČ! |       |       |
| 282 | 2 642372      | 6     | 6     | 7     | 7     | 6     | 6     | 6     | 7     | 7     | 7     | 7     | 7     | 6     | 6     | 5     | 6     | 6     | 3     | 5     | 5     | 4     | 4     | 3     | 3     | 3     | 8               | 3     | 4     | 2     | 5,35  | 8,00  | 1,00  | 34    | #NIČ! |       |       |
| 283 | #NIČ! 3808669 | #NIČ! | #NIČ! | #NIČ! | #NIČ! | #NIČ! | #NIČ! | #NIČ! | #NIČ! | #NIČ! | #NIČ! | #NIČ! | #NIČ! | #NIČ! | #NIČ! | #NIČ! | #NIČ! | #NIČ! | #NIČ! | #NIČ! | #NIČ! | #NIČ! | #NIČ! | #NIČ! | #NIČ! | #NIČ! | #NIČ!           | #NIČ! | #NIČ! | #NIČ! | #NIČ! | #NIČ! | #NIČ! | #NIČ! | #NIČ! | #NIČ! |       |
| 284 | #NIČ! 7116229 | #NIČ! | #NIČ! | #NIČ! | #NIČ! | #NIČ! | #NIČ! | #NIČ! | #NIČ! | #NIČ! | #NIČ! | #NIČ! | #NIČ! | #NIČ! | #NIČ! | #NIČ! | #NIČ! | #NIČ! | #NIČ! | #NIČ! | #NIČ! | #NIČ! | #NIČ! | #NIČ! | #NIČ! | #NIČ! | #NIČ!           | #NIČ! | #NIČ! | #NIČ! | #NIČ! | #NIČ! | #NIČ! | #NIČ! | #NIČ! | #NIČ! |       |
| 285 | 2 4155137     | 6     | 7     | 5     | 5     | 6     | 6     | 6     | 6     | 6     | 5     | 6     | 6     | 6     | 5     | 4     | 5     | 4     | 4     | 3     | 3     | 3     | 3     | 3     | 3     | 3     | 6               | 2     | 2     | 2     | 4,59  | 6,00  | 3,00  | 34    | #NIČ! |       |       |
| 286 | 2 9426997     | 6     | 7     | 7     | 6     | 6     | 6     | 6     | 6     | 7     | 6     | 6     | 6     | 7     | 6     | 6     | 5     | 6     | 3     | 4     | 4     | 5     | 4     | 5     | 4     | 3     | 6               | 1     | 4     | 2     | 5,18  | 6,00  | 3,00  | 34    | #NIČ! |       |       |
| 287 | 2 4669575     | 6     | 6     | 6     | 6     | 7     | 5     | 6     | 6     | 6     | 7     | 7     | 6     | 7     | 6     | 5     | 5     | 6     | 4     | 5     | 5     | 5     | 5     | 4     | 3     | 6     | 5               | 3     | 2     | 1     | 5,06  | 5,00  | 3,00  | 34    | #NIČ! |       |       |
| 288 | 2 5066886     | 6     | 6     | 6     | 6     | 6     | 5     | 6     | 6     | 5     | 6     | 5     | 6     | 6     | 6     | 6     | 4     | 5     | 4     | 4     | 4     | 4     | 4     | 5     | 5     | 3     | 1               | 2     | 4     | 2     | 4,65  | 1,00  | 2,00  | 34    | #NIČ! |       |       |
| 289 | 2 1325705     | 6     | 5     | 7     | 6     | 4     | 7     | 4     | 4     | 4     | 6     | 7     | 1     | 3     | 7     | 6     | 1     | 7     | 3     | 4     | 4     | 3     | 3     | 3     | 3     | 4     | 1               | 2     | 2     | 2     | 4,00  | 1,00  | 2,00  | 34    | #NIČ! |       |       |
| 290 | 2 1427868     | 7     | 7     | 7     | 7     | 7     | 7     | 7     | 6     | 7     | 7     | 7     | 6     | 6     | 7     | 6     | 6     | 7     | 4     | 5     | 5     | 5     | 5     | 5     | 3     | 5     | 5               | 2     | 2     | 2     | 5,71  | 5,00  | 3,00  | 34    | #NIČ! |       |       |
| 291 | 2 3162226     | 4     | 7     | 6     | 5     | 5     | 4     | 5     | 6     | 4     | 6     | 5     | 5     | 5     | 5     | 5     | 5     | 2     | 3     | 2     | 2     | 2     | 3     | 2     | 6     | 5     | 1               | 4     | 2     | 4,12  | 5,00  | 3,00  | 34    | #NIČ! |       |       |       |
| 292 | 2 1527526     | 1     | 7     | 3     | 4     | 5     | 5     | 3     | 2     | 3     | 5     | 6     | 4     | 5     | 5     | 4     | 6     | 4     | 3     | 3     | 3     | 4     | 4     | 3     | 3     | 2     | 3               | 2     | 2     | 2     | 3,24  | 3,00  | 5,00  | 34    | #NIČ! |       |       |
| 293 | 2 8150950     | 5     | 7     | 7     | 7     | 7     | 7     | 7     | 1     | 4     | 7     | 7     | 7     | 7     | 7     | 7     | 4     | 7     | 2     | 4     | 3     | 3     | 3     | 3     | 2     | 3     | 2               | 1     | 5     | 1     | 5,18  | 2,00  | 5,00  | 34    | #NIČ! |       |       |
| 294 | 2 6172175     | 6     | 6     | 6     | 6     | 7     | 5     | 6     | 5     | 6     | 7     | 6     | 6     | 7     | 7     | 6     | 5     | 7     | 3     | 4     | 3     | 3     | 3     | 1     | 1     | 4     | 20              | 2     | 2     | 1     | 5,12  | 20,00 | 1,00  | 34    | #NIČ! |       |       |
| 295 | 2 6408025     | 5     | 5     | 6     | 5     | 4     | 5     | 4     | 4     | 4     | 4     | 5     | 6     | 6     | 6     | 5     | 3     | 6     | 4     | 5     | 5     | 5     | 5     | 5     | 3     | 15    | 3               | 4     | 2     | 3,88  | 15,00 | 1,00  | 34    | #NIČ! |       |       |       |
| 296 | 2 3523600     | 3     | 4     | 7     | 4     | 4     | 4     | 7     | 4     | 3     | 4     | 4     | 6     | 7     | 6     | 7     | 4     | 7     | 7     | 4     | 3     | 3     | 3     | 3     | 5     | 3     | 1               | 1     | 5     | 2     | 4,18  | 1,00  | 2,00  | 34    | #NIČ! |       |       |
| 297 | #NIČ! 8393925 | #NIČ! | #NIČ! | #NIČ! | #NIČ! | #NIČ! | #NIČ! | #NIČ! | #NIČ! | #NIČ! | #NIČ! | #NIČ! | #NIČ! | #NIČ! | #NIČ! | #NIČ! | #NIČ! | #NIČ! | #NIČ! | #NIČ! | #NIČ! | #NIČ! | #NIČ! | #NIČ! | #NIČ! | #NIČ! | #NIČ!           | #NIČ! | #NIČ! | #NIČ! | #NIČ! | #NIČ! | #NIČ! | #NIČ! | #NIČ! | #NIČ! |       |
| 298 | 2 1398827     | 3     | 5     | 2     | 4     | 3     | 3     | 4     | 2     | 2     | 5     | 2     | 2     | 2     | 4     | 2     | 2     | 4     | 2     | 3     | 2     | 2     | 3     | 2     | 2     | 4     | 1               | 2     | 2     | 2     | 2,00  | 1,00  | 2,00  | 34    | #NIČ! |       |       |
| 299 | 2 1812360     | 4     | 5     | 7     | 5     | 5     | 6     | 7     | 6     | 1     | 7     | 7     | 5     | 5     | 4     | 4     | 3     | 5     | 1     | 3     | 2     | 2     | 2     | 2     | 2     | 6     | 8               | #NIČ! | 4     | 2     | 4,06  | 8,00  | 1,00  | 34    | #NIČ! |       |       |
| 300 | 2 4865318     | 4     | 4     | 5     | 4     | 6     | 6     | 6     | 6     | 6     | 6     | 6     | 3     | 5     | 6     | 7     | 6     | 5     | 5     | 2     | 2     | 2     | 1     | 1     | 3     | 2     | 2               | 2     | 4     | 2     | 4,29  | 1,00  | 2,00  | 34    | #NIČ! |       |       |
| 301 | #NIČ! 8889512 | #NIČ! | #NIČ! | #NIČ! | #NIČ! | #NIČ! | #NIČ! | #NIČ! | #NIČ! | #NIČ! | #NIČ! | #NIČ! | #NIČ! | #NIČ! | #NIČ! | #NIČ! | #NIČ! | #NIČ! | #NIČ! | #NIČ! | #NIČ! | #NIČ! | #NIČ! | #NIČ! | #NIČ! | #NIČ! | #NIČ!           | #NIČ! | #NIČ! | #NIČ! | #NIČ! | #NIČ! | #NIČ! | #NIČ! | #NIČ! | #NIČ! |       |
| 302 | 2 9851606     | 6     | 4     | 7     | 4     | 4     | 7     | 4     | 4     | 6     | 6     | 7     | 4     | 7     | 7     | 3     | 6     | 6     | 7     | 5     | 5     | 4     | 5     | 3     | 3     | 4     | 2               | 8     | 3     | 4     | 2     | 4,47  | 8,00  | 1,00  | 34    | #NIČ! |       |
| 303 | 2 2589493     | 6     | 7     | 6     | 7     | 7     | 7     | 6     | 6     | 7     | 7     | 7     | 6     | 7     | 7     | 6     | 6     | 6     | 3     | 5     | 5     | 3     | 5     | 3     | 3     | 3     | #NIČ! telefonij | 4     | 2     | 2     | 5,53  | 98,00 | 7,00  | 25    | 1,00  |       |       |
| 304 | 2 3392646     | 7     | 7     | 7     | 7     | 7     | 6     | 6     | 7     | 7     | 7     | 6     | 6     | 7     | 7     | 7     | 7     | 7     | 3     | 5     | 3     | 2     | 3     | 3     | 2     | 3     | 5               | 3     | 2     | 2     | 5,76  | 5,00  | 3,00  | 34    | #NIČ! |       |       |
| 305 | 2 9194755     | 6     | 7     | 6     | 6     | 6     | 6     | 6     | 6     | 6     | 6     | 6     | 6     | 6     | 6     | 6     | 2     | 5     | 3     | 4     | 4     | 4     | 4     | 3     | 3     | 4     | 11              | #NIČ! | 4     | 2     | 4,76  | 11,00 | 1,00  | 34    | #NIČ! |       |       |
| 306 | 2 5795835     | 6     | 7     | 7     | 7     | 6     | 6     | 6     | 6     | 6     | 6     | 6     | 6     | 6     | 6     | 6     | 7     | 6     | 7     | 3     | 5     | 5     | 4     | 4     | 5     | 4     | 6               | 15    | 3     | 4     | 2     | 5,29  | 15,00 | 1,00  | 34    | #NIČ! |       |
| 307 | 2 1394909     | 6     | 7     | 7     | 6     | 6     | 5     | 6     | 6     | 5     | 7     | 6     | 6     | 5     | 6     | 6     | 2     | 7     | 2     | 5     | 5     | 3     | 3     | 3     | 3     | 6     | 15              | 2     | 2     | 2     | 4,82  | 15,00 | 1,00  | 34    | #NIČ! |       |       |
| 308 | 2 9587040     | 4     | 5     | 5     | 5     | 5     | 5     | 6     | 5     | 4     | 3     | 5     | 5     | 3     | 3     | 4     | 4     | 1     | 7     | 1     | 3     | 3     | 3     | 3     | 3     | 6     | 18              | 3     | 2     | 2     | 3,35  | 18,00 | 3,00  | 34    | #NIČ! |       |       |
| 309 | #NIČ! 3750475 | #NIČ! | #NIČ! | #NIČ! | #NIČ! | #NIČ! | #NIČ! | #NIČ! | #NIČ! | #NIČ! | #NIČ! | #NIČ! | #NIČ! | #NIČ! | #NIČ! | #NIČ! | #NIČ! | #NIČ! | #NIČ! | #NIČ! | #NIČ! | #NIČ! | #NIČ! | #NIČ! | #NIČ! | #NIČ! | #NIČ!           | #NIČ! | #NIČ! | #NIČ! | #NIČ! | #NIČ! | #NIČ! | #NIČ! | #NIČ! | #NIČ! |       |
| 310 | 2 9991255     | 4     | 7     | 7     | 7     | 6     | 6     | 6     | 4     | 5     | 5     | 5     | 7     | 6     | 7     | 4     | 3     | 7     | 3     | 5     | 4     | 4     | 3     | 3     | 3     | 6     | 20              | 2     | 2     | 2     | 4,65  | 20,00 | 1,00  | 34    | #NIČ! |       |       |
| 311 | 2 8704850     | 2     | 5     | 7     | 5     | 6     | 7     | 6     | 5     | 2     | 5     | 5     | 4     | 4     | 7     | 4     | 6     | 7     | 2     | 4     | 5     | 3     | 3     | 3     | 3     | 3     | 6               | 1     | 4     | 2     | 4,12  | 6,00  | 3,00  | 34    | #NIČ! |       |       |
| 312 | 2 3550485     | 6     | 6     | 7     | 6     | 6     | 7     | 6     | 6     | 6     | 6     | 7     | 7     | 7     | 6     | 5     | 4     | 6     | 4     | 5     | 5     | 4     | 4     | 4     | 4     | 6     | 2               | 1     | 5     | 2     | 5,12  | 2,00  | 5,00  | 34    | #NIČ! |       |       |
| 313 | 2 1637875     | 6     | 5     | 7     | 6     | 6     | 6     | 6     | 5     | 7     | 6     | 5     | 5     | 6     | 5     | 5     | 4     | 7     | 2     | 5     | 5     | 2     | 5     | 5     | 4     | 4     | 2               | 1     | 4     | 2     | 4,71  | 2,00  | 5,00  | 34    | #NIČ! |       |       |
| 314 | 2 7537919     | 4     | 4     | 7     | 7     | 7     | 6     | 6     | 6     | 5     | 6     | 6     | 6     | 6     | 6     | 4     | 4     | 7     | 3     | 4     | 3     | 3     | 3     | 3     | 3     | 2     | 8               | 3     | 5     | 2     | 4,71  | 8,00  | 1,00  | 34    | #NIČ! |       |       |
| 315 | 2 2775971     | 6     | 6     | 6     | 6     | 5     | 6     | 5     | 5     | 6     | 6     | 5     | 5     | 4     | 6     | 6     | 3     | 6     | 2     | 5     | 5     | 5     | 5     | 5     | 3     | 4     | 3               | 1     | 4     | 2     | 4,41  | 3,00  | 5,00  | 34    | #NIČ! |       |       |
| 316 | 2 1266099     | 6     | 6     | 7     | 6     | 6     | 7     | 6     | 5     | 7     | 6     | 6     | 7     | 7     | 6     | 5     | 6     | 7     | 3     | 3     | 4     | 4     | 4     | 5     | 3     | 2     | 1               | 2     | 4     | 1     | 5,24  | 1,00  | 2,00  | 34    | #NIČ! |       |       |
| 317 | 2 8002580     | 5     | 6     | 7     | 6     | 5     | 7     | 6     | 5     | 7     | 6     | 6     | 7     | 7     | 6     | 4     | 5     | 7     | 3     | 4     | 5     | 3     | 4     | 5     | 5     | 2     | 1               | 1     | 4     | 2     | 5,00  | 1,00  | 2,00  | 34    | #NIČ! |       |       |
| 318 | 2 6214605     | 7     | 7     | 7     | 7     | 7     | 7     | 7     | 7     | 7     | 7     | 7     | 7     | 7     | 7     | 7     | 2     | 7     | 5     | 5     | 5     | 5     | 5     | 5     | 5     | 7     | 6               | 1     | 4     | 2     | 5,71  | 6,00  | 3,00  | 34    | #NIČ! |       |       |
| 319 | 2 7065286     | 6     | 7     | 7     | 7     | 7     | 6     | 7     | 7     | 7     | 7     | 5     | 6     | 6     | 7     | 5     | 6     | 6     | 3     | 4     | 4     | 3     | 4     | 4     | 3     | 2     | 7               | 2     | 2     | 2     | 5,41  | 7,00  | 4,00  | 34    | #NIČ! |       |       |
| 320 | 2 6682616     | 7     | 7     | 7     | 7     | 6     | 7     | 7     | 7     | 7     | 7     | 7     | 7     | 7     | 7     | 5     | 7     | 4     | 5     | 5     | 4     | 4     | 4     | 4     | 4     | 6     | 6               | 2     | 4     | 2     | 5,82  | 6,00  | 3,00  | 34    | #NIČ! |       |       |
| 321 | 2 2217223     | 4     | 4     | 5     | 4     | 4     | 4     | 4     | 4     | 4     | 4     | 3     | 3     | 3     | 3     | 4     | 3     | 4     | 2     | 3     | 3     | 2     | 3     | 3     | 2     | 6     | 21              | 2     | 4     | 2     | 2,76  | 21,00 | 1,00  | 34    | #NIČ  |       |       |

|     |                |       |       |       |       |       |       |       |       |       |       |       |       |       |       |       |       |       |       |       |       |       |       |       |       |       |        |       |       |       |       |       |       |       |       |       |       |
|-----|----------------|-------|-------|-------|-------|-------|-------|-------|-------|-------|-------|-------|-------|-------|-------|-------|-------|-------|-------|-------|-------|-------|-------|-------|-------|-------|--------|-------|-------|-------|-------|-------|-------|-------|-------|-------|-------|
| 326 | 0 2741978      | 4     | 4     | 5     | 3     | 4     | 3     | 2     | 4     | 4     | 4     | 4     | 4     | 4     | #NIČ! | 5     | 1     | 2     | 2     | 2     | #NIČ! | 3     | 2     | #NIČ! | #NIČ! | #NIČ! | #NIČ!  | 34    | #NIČ! |       |       |       |       |       |       |       |       |
| 327 | 2 6814416      | 5     | 5     | 7     | 3     | 5     | 5     | 5     | 5     | 5     | 4     | 4     | 4     | 5     | 4     | 4     | 4     | 5     | 2     | 3     | 4     | 3     | 2     | 2     | 3     | 6     | #NIČ!  | 2     | 4     | 2     | 3,65  | #NIČ! | #NIČ! | 34    | #NIČ! |       |       |
| 328 | 2 5846145      | 3     | 7     | 7     | 5     | 6     | 7     | 5     | 5     | 7     | 6     | 7     | 6     | 7     | 7     | 5     | 5     | 7     | 1     | 4     | 5     | 3     | 3     | 2     | 1     | 2     | 9      | 3     | 4     | 2     | 5,00  | 9,00  | 1,00  | 34    | #NIČ! |       |       |
| 329 | 2 8787478      | 7     | 7     | 7     | 7     | 7     | 7     | 7     | 7     | 7     | 7     | 7     | 7     | 7     | 7     | 7     | 7     | 7     | 3     | 4     | 5     | 4     | 3     | 2     | 2     | 4     | 7      | 2     | 4     | 2     | 6,00  | 7,00  | 4,00  | 34    | #NIČ! |       |       |
| 330 | 2 6398955      | 7     | 7     | 7     | 7     | 7     | 6     | 7     | 6     | 6     | 7     | 6     | 6     | 6     | 7     | 6     | 3     | 7     | 4     | 5     | 5     | 3     | 4     | 4     | 4     | 6     | 7      | 2     | 4     | 2     | 5,35  | 7,00  | 4,00  | 34    | #NIČ! |       |       |
| 331 | 2 5632340      | 6     | 6     | 6     | 6     | 6     | 6     | 6     | 6     | 6     | 6     | 6     | 6     | 6     | 7     | 6     | 5     | 6     | 5     | 5     | 4     | 3     | 3     | 4     | 3     | 2     | 9      | 3     | 4     | 2     | 5,06  | 9,00  | 1,00  | 34    | #NIČ! |       |       |
| 332 | 2 8964836      | 7     | 7     | 7     | 7     | 7     | 7     | 7     | 7     | 7     | 7     | 7     | 7     | 7     | 7     | 7     | 1     | 7     | 3     | 3     | 3     | 3     | 3     | 3     | 3     | 4     | 7      | 2     | 4     | 2     | 5,65  | 7,00  | 4,00  | 34    | #NIČ! |       |       |
| 333 | 2 7927159      | 7     | 7     | 6     | 7     | 6     | 6     | 6     | 5     | 5     | 5     | 5     | 6     | 6     | 7     | 5     | 5     | 5     | 4     | 5     | 5     | 5     | 5     | 3     | 4     | 3     | 1      | 2     | 2     | 2     | 4,82  | 1,00  | 2,00  | 34    | #NIČ! |       |       |
| 334 | 0 2741287      | #NIČ! | #NIČ! | #NIČ! | #NIČ! | #NIČ! | #NIČ! | #NIČ! | #NIČ! | #NIČ! | #NIČ! | #NIČ! | #NIČ! | #NIČ! | #NIČ! | #NIČ! | #NIČ! | #NIČ! | #NIČ! | #NIČ! | #NIČ! | #NIČ! | #NIČ! | #NIČ! | #NIČ! | #NIČ! | #NIČ!  | #NIČ! | #NIČ! | #NIČ! | #NIČ! | #NIČ! | #NIČ! | #NIČ! | 34    | #NIČ! |       |
| 335 | 2 9924961      | 5     | 6     | 6     | 5     | 6     | 4     | 5     | 4     | 6     | 6     | 5     | 6     | 5     | 5     | 4     | 5     | 5     | 3     | 5     | 5     | 4     | 4     | 4     | 3     | 2     | 9      | 3     | 4     | 2     | 4,18  | 9,00  | 1,00  | 34    | #NIČ! |       |       |
| 336 | 2 1400944      | 5     | 5     | 7     | 5     | 5     | 5     | 5     | 5     | 5     | 5     | 5     | 5     | 5     | 5     | 5     | 3     | 5     | 3     | 3     | 3     | 3     | 3     | 3     | 3     | 1     | 1      | 1     | 5     | 2     | 4,00  | 1,00  | 2,00  | 34    | #NIČ! |       |       |
| 337 | 2 7229837      | 5     | 6     | 6     | 5     | 5     | 5     | 5     | 5     | 5     | 5     | 5     | 5     | 5     | 5     | 5     | 7     | 7     | 4     | 3     | 3     | 3     | 3     | 4     | 3     | 3     | 1      | 1     | 5     | 1     | 4,35  | 1,00  | 2,00  | 34    | #NIČ! |       |       |
| 338 | #NIČ! 19246355 | #NIČ! | #NIČ! | #NIČ! | #NIČ! | #NIČ! | #NIČ! | #NIČ! | #NIČ! | #NIČ! | #NIČ! | #NIČ! | #NIČ! | #NIČ! | #NIČ! | #NIČ! | #NIČ! | #NIČ! | #NIČ! | #NIČ! | #NIČ! | #NIČ! | #NIČ! | #NIČ! | #NIČ! | #NIČ! | #NIČ!  | #NIČ! | #NIČ! | #NIČ! | #NIČ! | #NIČ! | #NIČ! | #NIČ! | 34    | #NIČ! |       |
| 339 | 2 8042263      | 6     | 6     | 6     | 6     | 4     | 4     | 4     | 3     | 6     | 6     | 6     | 6     | 6     | 5     | 3     | 3     | 1     | 4     | 3     | 3     | 2     | 4     | 3     | 6     | 7     | 2      | 4     | 2     | 4,06  | 7,00  | 4,00  | 34    | #NIČ! |       |       |       |
| 340 | 2 4372252      | 7     | 6     | 7     | 6     | 5     | 7     | 5     | 4     | 1     | 5     | 6     | 4     | 3     | 7     | 4     | 7     | 5     | 3     | 4     | 4     | 3     | 3     | 3     | 3     | 6     | 11     | 2     | 3     | 2     | 4,24  | 11,00 | 1,00  | 34    | #NIČ! |       |       |
| 341 | 2 7734472      | 7     | 7     | 7     | 7     | 7     | 7     | 6     | 7     | 6     | 7     | 7     | 7     | 7     | 7     | 6     | 6     | 7     | 3     | 5     | 5     | 4     | 4     | 3     | 3     | 4     | 6      | 2     | 2     | 2     | 5,76  | 6,00  | 3,00  | 34    | #NIČ! |       |       |
| 342 | 2 5555602      | 5     | 6     | 6     | 6     | 6     | 4     | 6     | 5     | 6     | 7     | 4     | 6     | 6     | 6     | 4     | 4     | 6     | 3     | 5     | 4     | 3     | 4     | 3     | 3     | 6     | 18     | 3     | 2     | 2     | 4,47  | 18,00 | 3,00  | 34    | #NIČ! |       |       |
| 343 | 2 4574597      | 6     | 6     | 7     | 7     | 6     | 6     | 6     | 6     | 6     | 7     | 7     | 6     | 6     | 6     | 7     | 5     | 7     | 3     | 5     | 5     | 3     | 3     | 3     | 5     | #NIČ! | 4      | 3     | 2     | 5,35  | #NIČ! | #NIČ! | 34    | #NIČ! |       |       |       |
| 344 | 2 6206178      | 7     | 7     | 7     | 7     | 7     | 7     | 6     | 6     | 6     | 7     | 7     | 6     | 7     | 7     | 6     | 7     | 7     | 4     | 5     | 5     | 5     | 4     | 5     | 4     | 6     | 5      | 1     | 4     | 2     | 5,71  | 5,00  | 3,00  | 34    | #NIČ! |       |       |
| 345 | 2 7307098      | 6     | 7     | 7     | 7     | 7     | 7     | 6     | 6     | 6     | 7     | 7     | 7     | 6     | 7     | 6     | 6     | 7     | 2     | 5     | 4     | 4     | 5     | 4     | 4     | 1     | 6      | 2     | 2     | 2     | 5,59  | 6,00  | 3,00  | 34    | #NIČ! |       |       |
| 346 | 2 7916959      | 6     | 7     | 7     | 7     | 7     | 7     | 6     | 6     | 6     | 7     | 7     | 7     | 7     | 7     | 6     | 6     | 3     | 5     | 5     | 5     | 4     | 3     | 3     | 4     | 7     | 2      | 4     | 2     | 2     | 5,65  | 7,00  | 4,00  | 34    | #NIČ! |       |       |
| 347 | 2 7663498      | 6     | 7     | 7     | 5     | 6     | 6     | 6     | 5     | 5     | 7     | 5     | 3     | 7     | 5     | 4     | 4     | 4     | 3     | 4     | 3     | 2     | 3     | 2     | 3     | 1     | 8      | 3     | 4     | 2     | 4,41  | 8,00  | 1,00  | 34    | #NIČ! |       |       |
| 348 | 1 4566616      | 5     | 7     | 7     | 6     | 6     | 4     | 5     | 4     | 4     | 7     | 7     | 3     | 7     | 6     | 3     | 1     | 5     | 1     | 5     | 3     | 2     | 3     | 2     | 1     | #NIČ! | #NIČ!  | #NIČ! | #NIČ! | #NIČ! | 4,12  | #NIČ! | #NIČ! | 34    | #NIČ! |       |       |
| 349 | 2 9842585      | 6     | 7     | 6     | 6     | 5     | 5     | 6     | 6     | 6     | 7     | 6     | 6     | 6     | 6     | 7     | 5     | 7     | 4     | 3     | 4     | 4     | 4     | 5     | 4     | 1     | 1      | 2     | 2     | 2     | 5,06  | 1,00  | 2,00  | 34    | #NIČ! |       |       |
| 350 | 2 5513078      | 6     | 6     | 6     | 6     | 6     | 5     | 6     | 5     | 6     | 5     | 6     | 5     | 6     | 5     | 7     | 5     | 5     | 5     | 4     | 5     | 5     | 4     | 5     | 5     | 4     | 2      | 12    | 3     | 2     | 4,59  | 12,00 | 1,00  | 34    | #NIČ! |       |       |
| 351 | 2 8037634      | 4     | 6     | 7     | 6     | 5     | 6     | 4     | 4     | 4     | 5     | 7     | 4     | 7     | 7     | 3     | 6     | 7     | 3     | 5     | 5     | 4     | 4     | 3     | 3     | 6     | 1      | 2     | 2     | 2     | 4,41  | 1,00  | 2,00  | 34    | #NIČ! |       |       |
| 352 | #NIČ! 3648939  | #NIČ! | #NIČ! | #NIČ! | #NIČ! | #NIČ! | #NIČ! | #NIČ! | #NIČ! | #NIČ! | #NIČ! | #NIČ! | #NIČ! | #NIČ! | #NIČ! | #NIČ! | #NIČ! | #NIČ! | #NIČ! | #NIČ! | #NIČ! | #NIČ! | #NIČ! | #NIČ! | #NIČ! | #NIČ! | #NIČ!  | #NIČ! | #NIČ! | #NIČ! | #NIČ! | #NIČ! | #NIČ! | #NIČ! | 34    | #NIČ! |       |
| 353 | 2 4131793      | 6     | 6     | 7     | 6     | 5     | 7     | 5     | 5     | 6     | 4     | 6     | 7     | 6     | 7     | 4     | 2     | 7     | 2     | 4     | 4     | 5     | 3     | 5     | 5     | 6     | 7      | 2     | 4     | 2     | 4,65  | 7,00  | 4,00  | 34    | #NIČ! |       |       |
| 354 | 2 9712146      | 6     | 7     | 7     | 6     | 6     | 6     | 6     | 6     | 7     | 7     | 6     | 6     | 6     | 7     | 7     | 1     | 7     | 1     | 5     | 5     | 5     | 4     | 5     | 5     | 6     | 7      | 2     | 4     | 2     | 5,12  | 7,00  | 4,00  | 34    | #NIČ! |       |       |
| 355 | 2 6165353      | 7     | 4     | 7     | 5     | 2     | 1     | 2     | 2     | 2     | 3     | 2     | 3     | 3     | 5     | 6     | 2     | 5     | 2     | 3     | 3     | 2     | 2     | 3     | 3     | 3     | 1      | 2     | 2     | 2     | 2,59  | 1,00  | 2,00  | 34    | #NIČ! |       |       |
| 356 | 2 1690327      | 6     | 7     | 7     | 7     | 6     | 7     | 7     | 4     | 5     | 7     | 6     | 7     | 7     | 4     | 5     | 3     | 3     | 3     | 3     | 3     | 3     | 3     | 3     | 4     | 6     | 7      | 2     | 5     | 2     | 5,00  | 7,00  | 4,00  | 34    | #NIČ! |       |       |
| 357 | 2 9955578      | 6     | 7     | 7     | 7     | 6     | 7     | 6     | 7     | 6     | 7     | 7     | 7     | 7     | 7     | 7     | 7     | 3     | 5     | 4     | 4     | 4     | 4     | 4     | 8     | #NIČ! | uprava | 4     | 2     | 2     | 5,82  | 98,00 | 7,00  | 26    | 1,00  |       |       |
| 358 | 2 4706907      | 4     | 5     | 5     | 4     | 5     | 5     | 4     | 4     | 5     | 5     | 4     | 4     | 5     | 4     | 4     | 4     | 3     | 2     | 3     | 2     | 2     | 2     | 3     | 4     | 7     | 2      | 2     | 2     | 2     | 3,47  | 7,00  | 4,00  | 34    | #NIČ! |       |       |
| 359 | 2 3667803      | 5     | 6     | 7     | 6     | 6     | 2     | 5     | 5     | 5     | 7     | 5     | 5     | 5     | 5     | 4     | 2     | 6     | 4     | 4     | 4     | 3     | 3     | 2     | 2     | 6     | 18     | 3     | 2     | 2     | 4,06  | 18,00 | 3,00  | 34    | #NIČ! |       |       |
| 360 | 2 4218295      | 6     | 7     | 6     | 6     | 6     | 5     | 5     | 5     | 6     | 6     | 6     | 6     | 6     | 6     | 6     | 5     | 6     | 3     | 3     | 4     | 4     | 4     | 4     | 4     | 6     | 3      | 2     | 4     | 1     | 4,82  | 3,00  | 5,00  | 34    | #NIČ! |       |       |
| 361 | 2 88063        | 6     | 6     | 7     | 6     | 6     | 7     | 6     | 6     | 6     | 7     | 7     | 7     | 6     | 6     | 4     | 6     | 4     | 5     | 4     | 4     | 4     | 4     | 5     | 4     | 6     | 7      | 2     | 4     | 2     | 5,18  | 7,00  | 4,00  | 34    | #NIČ! |       |       |
| 362 | 2 7785433      | 5     | 6     | 7     | 6     | 5     | 7     | 7     | 7     | 7     | 7     | 7     | 5     | 5     | 7     | 4     | 3     | 7     | 3     | 3     | 3     | 4     | 4     | 4     | 4     | 2     | 1      | 2     | 2     | 2     | 5,00  | 1,00  | 2,00  | 34    | #NIČ! |       |       |
| 363 | 2 8662978      | 5     | 6     | 7     | 4     | 4     | 6     | 5     | 4     | 5     | 6     | 6     | 4     | 6     | 6     | 5     | 6     | 7     | 2     | 3     | 4     | 3     | 3     | 2     | 2     | 4     | 3      | 5     | 5     | 1     | 4,41  | 3,00  | 5,00  | 34    | #NIČ! |       |       |
| 364 | 2 9958588      | 5     | 7     | 7     | 7     | 7     | 5     | 7     | 7     | 6     | 7     | 6     | 5     | 7     | 7     | 3     | 5     | 7     | 3     | 3     | 3     | 3     | 4     | 3     | 3     | 4     | 7      | 2     | 4     | 2     | 5,18  | 7,00  | 4,00  | 34    | #NIČ! |       |       |
| 365 | 2 3804006      | 5     | 7     | 7     | 7     | 6     | 7     | 6     | 6     | 6     | 6     | 6     | 6     | 6     | 7     | 6     | 6     | 7     | 3     | 4     | 4     | 3     | 3     | 2     | 3     | 2     | 21     | 2     | 2     | 2     | 5,29  | 21,00 | 1,00  | 34    | #NIČ! |       |       |
| 367 | 2 9144266      | 4     | 5     | 6     | 4     | 4     | 6     | 5     | 4     | 5     | 7     | 4     | 7     | 5     | 6     | 6     | 6     | 3     | 3     | 3     | 3     | 3     | 3     | 3     | 3     | 1     | 8      | 3     | 4     | 2     | 4,29  | 8,00  | 1,00  | 34    | #NIČ! |       |       |
| 368 | 2 4309315      | 5     | 6     | 7     | 7     | 7     | 6     | 3     | 6     | 7     | 6     | 5     | 7     | 7     | 7     | 1     | 6     | 1     | 1     | 3     | 2     | 3     | 3     | 1     | 4     | 7     | 2      | 1     | 1     | 4,88  | 7,00  | 4,00  | 34    | #NIČ! |       |       |       |
| 369 | 2 4113775      | 2     | 5     | 5     | 3     | 2     | 2     | 2     | 1     | 2     | 2     | 2     | 2     | 2     | 2     | 1     | 2     | 2     | 1     | 3     | 3     | 2     | 2     | 1     | 1     | 4     | 5      | 2     | #NIČ! | 2     | 1,29  | 5,00  | 3,00  | 34    | #NIČ! |       |       |
| 370 | 2 7640931      | 5     | 6     | 7     | 6     | 6     | 5     | 4     | 4     | 5     | 4     | 3     | 4     | 5     | 4     | 5     | 2     | 5     | 4     | 5     | 5     | 5     | 3     | 5     | 4     | 3     | 1      | 2     | 5     | 2     | 3,71  | 1,00  | 2,00  | 34    | #NIČ! |       |       |
| 371 | 2 5863331      | 6     | 7     | 7     | 6     | 6     | 7     | 6     | 4     | 4     | 6     | 4     | 4     | 6     | 6     | 5     | 3     | 5     | 2     | 4     | 4     | 3     | 2     | 4     | 3     | 7     | #NIČ!  | snmp  | 1     | 5     | 2     | 4,41  | 98,00 | 7,00  | 19    | 1,00  |       |
| 372 | 2 6393864      | 6     | 7     | 6     | 6     | 6     | 7     | 6     | 6     | 6     | 6     | 6     | 6     | 6     | 6     | 6     | 4     | 6     | 2     | 4     | 5     | 4     | 4     | 4     | 4     | 7     | #NIČ!  | 1     | 4     | 2     | 5,00  | #NIČ! | #NIČ! | 34    | #NIČ! |       |       |
| 373 | 2 4379325      | 6     | 7     | 7     | 6     | 6     | 6     | 5     | 5     | 5     | 5     | 4     | 6     | 6     | 6     | 6     | 4     | 6     | 4     | 5     | 5     | 5     | 4     | 4     | 3     | 4     | 5      | 5     | 4     | 1     | 4,65  | 5,00  | 3,00  | 34    | #NIČ! |       |       |
| 374 | #NIČ! 2715034  | #NIČ! | #NIČ! | #NIČ! | #NIČ! | #NIČ! | #NIČ! | #NIČ! | #NIČ! | #NIČ! | #NIČ! | #NIČ! | #NIČ! | #NIČ! | #NIČ! | #NIČ! | #NIČ! | #NIČ! | #NIČ! | #NIČ! | #NIČ! | #NIČ! | #NIČ! | #NIČ! | #NIČ! | #NIČ! | #NIČ!  | #NIČ! | #NIČ! | #NIČ! | #NIČ! | #NIČ! | #NIČ! | #NIČ! | 34    | #NIČ! |       |
| 376 | #NIČ! 437196   | #NIČ! | #NIČ! | #NIČ! | #NIČ! | #NIČ! | #NIČ! | #NIČ! | #NIČ! | #NIČ! | #NIČ! | #NIČ! | #NIČ! | #NIČ! | #NIČ! | #NIČ! | #NIČ! | #NIČ! | #NIČ! | #NIČ! | #NIČ! | #NIČ! | #NIČ! | #NIČ! | #NIČ! | #NIČ! | #NIČ!  | #NIČ! | #NIČ! | #NIČ! | #NIČ! | #NIČ! | #NIČ! | #NIČ! | #NIČ! | 34    | #NIČ! |
| 377 | 2 4040877      | 6     | 7     | 6     | 6     | 7     | 6     | 6     | 6     | 7     | 7     | 7     | 6     | 7     | 6     | 5     | 4     | 4     | 5     | 5     | 5     | 5     | 4     | 3     | 6     | 12    | 3      | 4     | 2     | 2     | 5,24  | 12,00 | 1,00  | 34    | #NIČ! |       |       |
| 378 | 2 8892796      | 5     | 6     | 6     | 5     | 5     | 6     | 5     | 5     | 5     | 5     | 5     | 6     | 6     | 5     | 4     | 6     |       |       |       |       |       |       |       |       |       |        |       |       |       |       |       |       |       |       |       |       |

|     |               |       |       |       |       |       |       |       |       |       |       |       |       |       |       |       |       |       |       |       |       |       |       |       |       |       |           |       |       |         |       |       |       |       |       |       |       |
|-----|---------------|-------|-------|-------|-------|-------|-------|-------|-------|-------|-------|-------|-------|-------|-------|-------|-------|-------|-------|-------|-------|-------|-------|-------|-------|-------|-----------|-------|-------|---------|-------|-------|-------|-------|-------|-------|-------|
| 384 | 2 5503699     | 7     | 6     | 7     | 6     | 5     | 5     | 5     | 5     | 6     | 7     | 6     | 7     | 6     | 7     | 7     | 6     | 7     | 3     | 4     | 5     | 4     | 3     | 4     | 4     | 5     | 1         | 2     | 4     | 1       | 5,18  | 1,00  | 2,00  | 34    | #NIČ! |       |       |
| 385 | 2 3165227     | 5     | 7     | 7     | 4     | 5     | 4     | 5     | 4     | 6     | 5     | 3     | 2     | 5     | 5     | 3     | 2     | 5     | 3     | 5     | 5     | 3     | 2     | 3     | 2     | 4     | 8         | 3     | 3     | 2       | 3,53  | 8,00  | 1,00  | 34    | #NIČ! |       |       |
| 386 | 2 9315039     | 7     | 7     | 7     | 6     | 7     | 7     | 7     | 7     | 7     | 7     | 7     | 7     | 6     | 7     | 6     | 6     | 6     | 5     | 5     | 5     | 5     | 5     | 5     | 5     | 2     | 9         | 3     | 4     | 2       | 5,71  | 9,00  | 1,00  | 34    | #NIČ! |       |       |
| 387 | #NIČ! 7079513 | #NIČ! | #NIČ! | #NIČ! | #NIČ! | #NIČ! | #NIČ! | #NIČ! | #NIČ! | #NIČ! | #NIČ! | #NIČ! | #NIČ! | #NIČ! | #NIČ! | #NIČ! | #NIČ! | #NIČ! | #NIČ! | #NIČ! | #NIČ! | #NIČ! | #NIČ! | #NIČ! | #NIČ! | #NIČ! | #NIČ!     | #NIČ! | #NIČ! | #NIČ!   | #NIČ! | #NIČ! | #NIČ! | #NIČ! | #NIČ! | #NIČ! |       |
| 388 | 2 7452448     | 5     | 5     | 5     | 4     | 4     | 4     | 4     | 5     | 5     | 5     | 5     | 5     | 5     | 5     | 3     | 4     | 3     | 3     | 3     | 3     | 3     | 3     | 3     | 3     | 1     | 4         | 2     | 2     | 2       | 3,59  | 4,00  | 6,00  | 34    | #NIČ! |       |       |
| 389 | 2 6023701     | 6     | 6     | 7     | 6     | 7     | 7     | 6     | 7     | 7     | 7     | 7     | 7     | 6     | 7     | 6     | 7     | 5     | 5     | 5     | 5     | 5     | 4     | 4     | 3     | #NIČ! | steriliza | 2     | 2     | 2       | 5,65  | 98,00 | 7,00  | 23    | 1,00  |       |       |
| 390 | 2 7761162     | 6     | 7     | 7     | 7     | 7     | 7     | 7     | 6     | 7     | 6     | 7     | 6     | 7     | 6     | 5     | 7     | 3     | 5     | 5     | 4     | 4     | 3     | 2     | 6     |       | 1         | 4     | 2     | 5,59    | 6,00  | 3,00  | 34    | #NIČ! |       |       |       |
| 391 | 2 734709      | 5     | 6     | 6     | 5     | 5     | 6     | 5     | 4     | 5     | 6     | 6     | 5     | 7     | 6     | 3     | 5     | 6     | 3     | 3     | 3     | 3     | 3     | 3     | 3     | 3     | 11        | 3     | 4     | 2       | 4,35  | 11,00 | 1,00  | 34    | #NIČ! |       |       |
| 392 | 2 390058      | 4     | 7     | 7     | 7     | 4     | 4     | 4     | 4     | 4     | 5     | 4     | 4     | 5     | 5     | 5     | 4     | 4     | 3     | 4     | 3     | 3     | 3     | 3     | 3     | 8     | #NIČ!     | 4     | 4     | 2       | 3,76  | #NIČ! | #NIČ! | 34    | #NIČ! |       |       |
| 393 | 2 9746162     | 7     | 7     | 7     | 7     | 7     | 6     | 7     | 7     | 6     | 7     | 6     | 6     | 7     | 7     | 7     | 5     | 7     | 4     | 5     | 5     | 4     | 4     | 4     | 3     | 1     | 6         | 1     | 4     | 2       | 5,65  | 6,00  | 3,00  | 34    | #NIČ! |       |       |
| 394 | #NIČ! 7560637 | #NIČ! | #NIČ! | #NIČ! | #NIČ! | #NIČ! | #NIČ! | #NIČ! | #NIČ! | #NIČ! | #NIČ! | #NIČ! | #NIČ! | #NIČ! | #NIČ! | #NIČ! | #NIČ! | #NIČ! | #NIČ! | #NIČ! | #NIČ! | #NIČ! | #NIČ! | #NIČ! | #NIČ! | #NIČ! | #NIČ!     | #NIČ! | #NIČ! | #NIČ!   | #NIČ! | #NIČ! | #NIČ! | #NIČ! | #NIČ! | #NIČ! |       |
| 395 | 2 8564697     | 6     | 6     | 5     | 6     | 6     | 6     | 6     | 6     | 6     | 6     | 5     | 6     | 7     | 6     | 5     | 5     | 3     | 4     | 4     | 4     | 3     | 3     | 4     | 1     | 1     | 2         | 1     | 2     | 4,76    | 1,00  | 2,00  | 34    | #NIČ! |       |       |       |
| 396 | 2 141578      | 6     | 6     | 7     | 6     | 6     | 6     | 7     | 6     | 6     | 7     | 6     | 6     | 7     | 6     | 7     | 3     | 3     | 4     | 4     | 3     | 4     | 4     | 4     | 8     | #NIČ! | Uprava    | 4     | #NIČ! | univerz | 2     | 5,41  | 98,00 | 7,00  | 27    | 1,00  |       |
| 397 | 2 5013796     | 7     | 7     | 7     | 6     | 5     | 7     | 5     | 6     | 6     | 5     | 6     | 7     | 6     | 6     | 7     | 3     | 7     | 2     | 5     | 5     | 5     | 4     | 3     | 3     | 3     | 17        | 3     | 5     | 2       | 5,06  | 17,00 | 1,00  | 34    | #NIČ! |       |       |
| 398 | 2 4644249     | 4     | 5     | 6     | 6     | 4     | 5     | 6     | 6     | 6     | 6     | 4     | 3     | 6     | 6     | 6     | 3     | 4     | 2     | 3     | 3     | 4     | 3     | 4     | 4     | 2     | 1         | 1     | 4     | 1       | 4,06  | 1,00  | 2,00  | 34    | #NIČ! |       |       |
| 399 | 2 8179858     | 5     | 7     | 6     | 7     | 7     | 6     | 6     | 6     | 6     | 7     | 6     | 6     | 7     | 6     | 6     | 1     | 7     | 4     | 5     | 5     | 4     | 4     | 2     | 3     | 4     | 6         | 2     | 1     | 2       | 5,00  | 6,00  | 3,00  | 34    | #NIČ! |       |       |
| 400 | 2 6966540     | 6     | 5     | 7     | 7     | 6     | 5     | 5     | 3     | 4     | 7     | 5     | 7     | 5     | 6     | 7     | 3     | 6     | 5     | 3     | 4     | 4     | 5     | 2     | 3     | 2     | 17        | 2     | 2     | 2       | 4,53  | 17,00 | 1,00  | 34    | #NIČ! |       |       |
| 401 | 2 293129      | 6     | 5     | 7     | 7     | 7     | 7     | 6     | 7     | 6     | 6     | 7     | 7     | 6     | 7     | 7     | 2     | 5     | 3     | 4     | 5     | 4     | 3     | 3     | 3     | 2     | 2         | 2     | 2     | 2       | 5,18  | 2,00  | 5,00  | 34    | #NIČ! |       |       |
| 402 | #NIČ! 5660229 | #NIČ! | #NIČ! | #NIČ! | #NIČ! | #NIČ! | #NIČ! | #NIČ! | #NIČ! | #NIČ! | #NIČ! | #NIČ! | #NIČ! | #NIČ! | #NIČ! | #NIČ! | #NIČ! | #NIČ! | #NIČ! | #NIČ! | #NIČ! | #NIČ! | #NIČ! | #NIČ! | #NIČ! | #NIČ! | #NIČ!     | #NIČ! | #NIČ! | #NIČ!   | #NIČ! | #NIČ! | #NIČ! | #NIČ! | #NIČ! | #NIČ! |       |
| 403 | 2 1950730     | 6     | 6     | 5     | 6     | 5     | 5     | 6     | 5     | 5     | 6     | 5     | 5     | 5     | 6     | 5     | 5     | 5     | 3     | 4     | 4     | 3     | 4     | 3     | 3     | 1     | 2         | 1     | 5     | 1       | 4,35  | 2,00  | 5,00  | 34    | #NIČ! |       |       |
| 404 | 2 8055582     | 1     | 7     | 7     | 7     | 7     | 6     | 5     | 5     | 6     | 7     | 7     | 2     | 4     | 7     | 6     | 1     | 7     | 4     | 4     | 1     | 1     | 4     | 3     | 2     | 1     | 1         | 2     | 2     | 2       | 4,41  | 1,00  | 2,00  | 34    | #NIČ! |       |       |
| 405 | 2 4425720     | 3     | 6     | 4     | 5     | 3     | 5     | 3     | 2     | 2     | 2     | 3     | 2     | 2     | 3     | 5     | 1     | 2     | 1     | 3     | 1     | 1     | 3     | 2     | 1     | 1     | 1         | 2     | 2     | 2       | 2,12  | 1,00  | 2,00  | 34    | #NIČ! |       |       |
| 406 | 2 7961852     | 6     | 6     | 6     | 7     | 7     | 7     | 7     | 7     | 7     | 7     | 7     | 7     | 7     | 7     | 7     | 6     | 6     | 4     | 3     | 4     | 3     | 3     | 3     | 3     | 1     | 1         | 2     | 3     | 2       | 5,71  | 1,00  | 2,00  | 34    | #NIČ! |       |       |
| 407 | 2 6532103     | 4     | 5     | 6     | 6     | 6     | 6     | 5     | 5     | 5     | 6     | 6     | 5     | 5     | 5     | 6     | 5     | 5     | 3     | 4     | 4     | 4     | 3     | 3     | 3     | 2     | #NIČ!     | 3     | 2     | 4,41    | #NIČ! | #NIČ! | 34    | #NIČ! |       |       |       |
| 408 | 2 8774959     | 3     | 4     | 4     | 4     | 4     | 5     | 3     | 3     | 4     | 4     | 4     | 5     | 3     | 4     | 3     | 4     | 3     | 4     | 4     | 3     | 2     | 3     | 3     | 3     | 2     | 21        | 2     | 2     | 2,76    | 21,00 | 1,00  | 34    | #NIČ! |       |       |       |
| 409 | 2 4278484     | 6     | 6     | 7     | 6     | 6     | 6     | 6     | 6     | 6     | 6     | 7     | 6     | 6     | 7     | 6     | 7     | 3     | 3     | 3     | 3     | 3     | 3     | 3     | 3     | 2     | 17        | 2     | 2     | 2       | 5,29  | 17,00 | 1,00  | 34    | #NIČ! |       |       |
| 410 | 2 5067544     | 5     | 5     | 5     | 5     | 5     | 5     | 3     | 5     | 5     | 5     | 5     | 5     | 5     | 5     | 3     | 5     | 3     | 3     | 3     | 3     | 3     | 3     | 3     | 3     | 3     | 14        | 2     | 4     | 2       | 3,76  | 14,00 | 1,00  | 34    | #NIČ! |       |       |
| 412 | 2 7308712     | 3     | 6     | 6     | 6     | 7     | 6     | 7     | 6     | 7     | 7     | 7     | 7     | 7     | 7     | 6     | 1     | 7     | 3     | 3     | 3     | 2     | 3     | 2     | 2     | 5     | 18        | 3     | 2     | 1       | 5,06  | 18,00 | 3,00  | 34    | #NIČ! |       |       |
| 413 | 2 2502269     | 7     | 7     | 7     | 7     | 7     | 7     | 7     | 6     | 6     | 6     | 6     | 6     | 6     | 6     | 6     | 5     | 5     | 5     | 4     | 5     | 5     | 3     | 3     | 3     | 3     | 6         | 6     | 2     | 2       | 2     | 5,24  | 6,00  | 3,00  | 34    | #NIČ! |       |
| 414 | 2 9036755     | 6     | 7     | 7     | 7     | 6     | 6     | 6     | 7     | 7     | 7     | 6     | 7     | 6     | 7     | 6     | 5     | 7     | 4     | 5     | 5     | 3     | 4     | 2     | 3     | 1     | 20        | 1     | 5     | 1       | 5,47  | 20,00 | 1,00  | 34    | #NIČ! |       |       |
| 415 | 2 3257640     | 2     | 6     | 6     | 5     | 6     | 4     | 5     | 6     | 6     | 6     | 6     | 6     | 6     | 6     | 5     | 1     | 4     | 3     | 3     | 3     | 2     | 2     | 3     | 2     | 2     | 9         | 3     | 4     | 2       | 4,06  | 9,00  | 1,00  | 34    | #NIČ! |       |       |
| 416 | 2 9177935     | 7     | 7     | 7     | 6     | 6     | 7     | 5     | 4     | 5     | 7     | 7     | 6     | 7     | 7     | 6     | 6     | 7     | 2     | 4     | 5     | 4     | 3     | 3     | 3     | 4     | 3         | 2     | 3     | 1       | 5,29  | 3,00  | 5,00  | 34    | #NIČ! |       |       |
| 417 | 2 6116755     | 4     | 5     | 4     | 4     | 4     | 4     | 4     | 3     | 3     | 3     | 5     | 4     | 4     | 4     | 2     | 4     | 5     | 3     | 4     | 4     | 4     | 4     | 4     | 4     | 5     | 1         | 1     | 5     | 2       | 2,88  | 1,00  | 2,00  | 34    | #NIČ! |       |       |
| 418 | 2 3049971     | 7     | 7     | 7     | 7     | 6     | 6     | 7     | 7     | 6     | 7     | 6     | 6     | 7     | 7     | 7     | 5     | 7     | 4     | 3     | 3     | 2     | 3     | 3     | 1     | 1     | 26        | #NIČ! | 5     | 2       | 5,59  | 26,00 | 1,00  | 34    | #NIČ! |       |       |
| 419 | #NIČ! 6899592 | #NIČ! | #NIČ! | #NIČ! | #NIČ! | #NIČ! | #NIČ! | #NIČ! | #NIČ! | #NIČ! | #NIČ! | #NIČ! | #NIČ! | #NIČ! | #NIČ! | #NIČ! | #NIČ! | #NIČ! | #NIČ! | #NIČ! | #NIČ! | #NIČ! | #NIČ! | #NIČ! | #NIČ! | #NIČ! | #NIČ!     | #NIČ! | #NIČ! | #NIČ!   | #NIČ! | #NIČ! | #NIČ! | #NIČ! | #NIČ! | #NIČ! | #NIČ! |
| 420 | 2 5348044     | 6     | 7     | 7     | 7     | 6     | 6     | 7     | 6     | 6     | 7     | 6     | 6     | 6     | 6     | 5     | 5     | 5     | 5     | 4     | 3     | 3     | 3     | 3     | 3     | 3     | 1         | 1     | 5     | 2       | 5,18  | 1,00  | 2,00  | 34    | #NIČ! |       |       |
| 422 | 2 6041447     | 4     | 6     | 7     | 4     | 4     | 7     | 3     | 3     | 3     | 3     | 6     | 4     | 3     | 6     | 4     | 2     | 7     | 4     | 4     | 4     | 4     | 3     | 2     | 4     | 1     | 2         | 2     | 2     | 3,47    | 1,00  | 2,00  | 34    | #NIČ! |       |       |       |
| 423 | 2 4163103     | 6     | 7     | 7     | 6     | 6     | 6     | 6     | 6     | 6     | 7     | 6     | 5     | 6     | 7     | 6     | 6     | 7     | 4     | 4     | 5     | 5     | 4     | 5     | 5     | 8     | #NIČ!     | 4     | 5     | 1       | 5,24  | #NIČ! | #NIČ! | 34    | #NIČ! |       |       |
| 424 | 2 2691174     | 6     | 7     | 7     | 6     | 6     | 7     | 7     | 6     | 6     | 7     | 6     | 7     | 6     | 7     | 6     | 5     | 6     | 5     | 5     | 5     | 5     | 5     | 5     | 5     | 1     | 1         | 1     | 5     | 2       | 5,35  | 1,00  | 2,00  | 34    | #NIČ! |       |       |
| 425 | 2 966559      | 6     | 7     | 7     | 7     | 7     | 6     | 6     | 6     | 6     | 7     | 6     | 7     | 7     | 6     | 5     | 6     | 6     | 2     | 3     | 3     | 3     | 4     | 2     | 3     | 4     | 7         | 2     | 4     | 2       | 5,35  | 7,00  | 4,00  | 34    | #NIČ! |       |       |
| 426 | 2 6759276     | 5     | 6     | 7     | 6     | 5     | 5     | 6     | 5     | 4     | 6     | 6     | 5     | 5     | 5     | 5     | 4     | 5     | 2     | 5     | 5     | 4     | 4     | 5     | 4     | 6     | 2         | 2     | 4     | 1       | 4,29  | 2,00  | 5,00  | 34    | #NIČ! |       |       |
| 427 | 2 896702      | 6     | 6     | 6     | 6     | 6     | 5     | 7     | 7     | 5     | 6     | 6     | 5     | 5     | 7     | 5     | 5     | 7     | 1     | 5     | 5     | 5     | 5     | 5     | 5     | 6     | 7         | 2     | 2     | 2       | 4,88  | 7,00  | 4,00  | 34    | #NIČ! |       |       |
| 428 | 2 4205681     | 6     | 7     | 7     | 6     | 7     | 7     | 6     | 7     | 7     | 6     | 7     | 7     | 6     | 7     | 6     | 5     | 7     | 7     | 3     | 3     | 3     | 3     | 4     | 3     | 2     | 4         | 7     | 2     | 4       | 2     | 5,59  | 7,00  | 4,00  | 34    | #NIČ! |       |
| 429 | 2 8338298     | 6     | 7     | 7     | 6     | 6     | 6     | 6     | 6     | 7     | 6     | 7     | 2     | 6     | 6     | 7     | 6     | 1     | 7     | 4     | 5     | 2     | 5     | 5     | 5     | 3     | 7         | 2     | 3     | 2       | 4,82  | 7,00  | 4,00  | 34    | #NIČ! |       |       |
| 430 | 2 9074451     | 4     | 5     | 2     | 6     | 6     | 6     | 6     | 5     | 7     | 7     | 7     | 7     | 7     | 7     | 7     | 7     | 3     | 1     | 4     | 2     | 4     | 5     | 5     | 4     | 12    | 3         | 2     | 2     | 5,06    | 12,00 | 1,00  | 34    | #NIČ! |       |       |       |
| 431 | #NIČ! 357359  | #NIČ! | #NIČ! | #NIČ! | #NIČ! | #NIČ! | #NIČ! | #NIČ! | #NIČ! | #NIČ! | #NIČ! | #NIČ! | #NIČ! | #NIČ! | #NIČ! | #NIČ! | #NIČ! | #NIČ! | #NIČ! | #NIČ! | #NIČ! | #NIČ! | #NIČ! | #NIČ! | #NIČ! | #NIČ! | #NIČ!     | #NIČ! | #NIČ! | #NIČ!   | #NIČ! | #NIČ! | #NIČ! | #NIČ! | #NIČ! | #NIČ! | #NIČ! |
| 432 | 2 4563442     | 7     | 7     | 7     | 6     | 6     | 7     | 6     | 6     | 6     | 7     | 6     | 7     | 6     | 6     | 6     | 4     | 5     | 5     | 4     | 4     | 3     | 2     | 2     | 1     | 2     | 2         | 2     | 2     | 2       | 5,41  | 1,00  | 2,00  | 34    | #NIČ! |       |       |
| 433 | 2 1745133     | 7     | 7     | 7     | 7     | 6     | 5     | 6     | 6     | 7     | 7     | 5     | 6     | 7     | 6     | 6     | 5     | 6     | 3     | 5     | 5     | 5     | 5     | 5     | 5     | 2     | 7         | 2     | 3     | 2       | 5,24  | 7,00  | 4,00  | 34    | #NIČ! |       |       |
| 434 | 2 5035340     | 7     | 7     | 7     | 7     | 6     | 7     | 5     | 5     | 7     | 5     | 7     | 5     | 5     | 7     | 6     | 3     | 7     | 2     | 5     | 5     | 5     | 4     | 5     | 4     | 2     | 7         | 2     | 2     | 2       | 5,06  | 7,00  | 4,00  | 34    | #NIČ! |       |       |
| 435 | 2 9941301     | 6     | 7     | 7     | 7     | 7     | 7     | 7     | 6     | 6     | 7     | 7     | 6     | 6     | 7     | 7     | 7     | 3     | 4     | 4     | 4     | 3     | 4     | 4     | 4     | 15    | 2         | 2     | 2     | 2       | 5,71  | 15,00 | 1,00  | 34    | #NIČ! |       |       |
| 436 | 2 4600487     | 6     | 7     | 7     | 6     | 6     | 5     | 6     | 7     |       |       |       |       |       |       |       |       |       |       |       |       |       |       |       |       |       |           |       |       |         |       |       |       |       |       |       |       |



|     |               |       |       |       |       |       |       |       |       |       |       |       |       |       |       |       |       |       |       |       |       |       |       |       |       |       |          |          |       |       |          |       |       |       |       |       |       |
|-----|---------------|-------|-------|-------|-------|-------|-------|-------|-------|-------|-------|-------|-------|-------|-------|-------|-------|-------|-------|-------|-------|-------|-------|-------|-------|-------|----------|----------|-------|-------|----------|-------|-------|-------|-------|-------|-------|
| 440 | 2 8328201     | 5     | 6     | 6     | 5     | 5     | 5     | 6     | 5     | 6     | 6     | 4     | 5     | 7     | 6     | 5     | 4     | 7     | 3     | 4     | 4     | 4     | 4     | 4     | 3     | 12    | 3        | 5        | 1     | 4,47  | 12,00    | 1,00  | 34    | #NIČ! |       |       |       |
| 441 | 2 8879945     | 5     | 6     | 7     | 7     | 7     | 6     | 5     | 6     | 6     | 7     | 5     | 4     | 5     | 6     | 5     | 4     | 5     | 5     | 5     | 5     | 4     | 5     | 5     | 5     | 2     | 7        | 2        | 4     | 2     | 4,65     | 7,00  | 4,00  | 34    | #NIČ! |       |       |
| 442 | 2 9415122     | 7     | 7     | 7     | 7     | 7     | 6     | 7     | 7     | 7     | 7     | 7     | 7     | 7     | 7     | 6     | 6     | 6     | 4     | 4     | 5     | 5     | 5     | 5     | 4     | 2     | 7        | 2        | 4     | 2     | 5,76     | 7,00  | 4,00  | 34    | #NIČ! |       |       |
| 443 | 2 435778      | 5     | 7     | 7     | 5     | 4     | 3     | 3     | 4     | 1     | 6     | 7     | 4     | 2     | 6     | 2     | 2     | 4     | 2     | 5     | 5     | 5     | 3     | 2     | 2     | 6     | 5        | 2        | 2     | 2     | 3,24     | 5,00  | 3,00  | 34    | #NIČ! |       |       |
| 444 | 2 3933521     | 4     | 4     | 7     | 5     | 4     | 4     | 4     | 3     | 4     | 5     | 4     | 4     | 5     | 5     | 4     | 4     | 4     | 3     | 3     | 3     | 3     | 3     | 3     | 4     | 4     | 2        | 4        | 2     | 2     | 3,35     | 4,00  | 6,00  | 34    | #NIČ! |       |       |
| 445 | 2 8360272     | 7     | 7     | 7     | 7     | 7     | 7     | 7     | 7     | 7     | 7     | 7     | 7     | 7     | 7     | 6     | 6     | 7     | 1     | 4     | 2     | 4     | 1     | 4     | 4     | 1     | 14       | 2        | 2     | 5,88  | 14,00    | 1,00  | 34    | #NIČ! |       |       |       |
| 446 | 2 800         | 7     | 7     | 7     | 6     | 6     | 6     | 6     | 4     | 6     | 7     | 4     | 4     | 6     | 5     | 6     | 2     | 7     | 4     | 5     | 5     | 4     | 4     | 4     | 4     | 3     | 2        | 1        | 5     | 2     | 4,65     | 2,00  | 5,00  | 34    | #NIČ! |       |       |
| 447 | 2 4923182     | 4     | 7     | 5     | 5     | 6     | 4     | 5     | 4     | 5     | 6     | 5     | 4     | 5     | 6     | 4     | 3     | 5     | 4     | 4     | 4     | 4     | 4     | 4     | 4     | 4     | 17       | 1        | 5     | 1     | 3,88     | 17,00 | 1,00  | 34    | #NIČ! |       |       |
| 448 | 2 4613510     | 7     | 7     | 7     | 7     | 7     | 6     | 6     | 6     | 6     | 6     | 6     | 6     | 6     | 6     | 6     | 6     | 6     | 4     | 4     | 4     | 4     | 4     | 4     | 4     | 3     | 17       | 2        | 3     | 2     | 5,29     | 17,00 | 1,00  | 34    | #NIČ! |       |       |
| 449 | 2 8298006     | 4     | 7     | 7     | 7     | 7     | 4     | 7     | 6     | 6     | 7     | 5     | 7     | 7     | 7     | 7     | 4     | 7     | 3     | 5     | 5     | 4     | 5     | 4     | 4     | 6     | 18       | 3        | 2     | 2     | 5,24     | 18,00 | 3,00  | 34    | #NIČ! |       |       |
| 450 | #NIČ! 7649501 | #NIČ! | #NIČ! | #NIČ! | #NIČ! | #NIČ! | #NIČ! | #NIČ! | #NIČ! | #NIČ! | #NIČ! | #NIČ! | #NIČ! | #NIČ! | #NIČ! | #NIČ! | #NIČ! | #NIČ! | #NIČ! | #NIČ! | #NIČ! | #NIČ! | #NIČ! | #NIČ! | #NIČ! | #NIČ! | #NIČ!    | #NIČ!    | #NIČ! | #NIČ! | #NIČ!    | #NIČ! | #NIČ! | #NIČ! | #NIČ! | #NIČ! | #NIČ! |
| 451 | 2 3353485     | 4     | 7     | 7     | 6     | 6     | 7     | 5     | 4     | 6     | 6     | 6     | 5     | 6     | 6     | 6     | 4     | 5     | 5     | 3     | 3     | 3     | 3     | 3     | 3     | 2     | 16       | 2        | 2     | 4,59  | 16,00    | 1,00  | 34    | #NIČ! |       |       |       |
| 452 | 0 3818921     | #NIČ! | #NIČ! | #NIČ! | #NIČ! | #NIČ! | #NIČ! | #NIČ! | #NIČ! | #NIČ! | #NIČ! | #NIČ! | #NIČ! | #NIČ! | #NIČ! | #NIČ! | #NIČ! | #NIČ! | #NIČ! | #NIČ! | #NIČ! | #NIČ! | #NIČ! | #NIČ! | #NIČ! | #NIČ! | #NIČ!    | #NIČ!    | #NIČ! | #NIČ! | #NIČ!    | #NIČ! | #NIČ! | #NIČ! | #NIČ! | #NIČ! | #NIČ! |
| 453 | #NIČ! 9034154 | #NIČ! | #NIČ! | #NIČ! | #NIČ! | #NIČ! | #NIČ! | #NIČ! | #NIČ! | #NIČ! | #NIČ! | #NIČ! | #NIČ! | #NIČ! | #NIČ! | #NIČ! | #NIČ! | #NIČ! | #NIČ! | #NIČ! | #NIČ! | #NIČ! | #NIČ! | #NIČ! | #NIČ! | #NIČ! | #NIČ!    | #NIČ!    | #NIČ! | #NIČ! | #NIČ!    | #NIČ! | #NIČ! | #NIČ! | #NIČ! | #NIČ! | #NIČ! |
| 454 | 2 3714006     | 6     | 7     | 7     | 6     | 6     | 6     | 6     | 6     | 6     | 7     | 6     | 6     | 7     | 7     | 7     | 4     | 7     | 4     | 4     | 4     | 4     | 3     | 4     | 4     | 2     | 16       | 1        | 5     | 2     | 5,29     | 16,00 | 1,00  | 34    | #NIČ! |       |       |
| 455 | 2 1467566     | 6     | 6     | 6     | 6     | 6     | 6     | 6     | 6     | 6     | 6     | 6     | 4     | 6     | 6     | 6     | 6     | 6     | 3     | 3     | 3     | 3     | 3     | 3     | 3     | 1     | 1        | 2        | 2     | 2     | 4,88     | 1,00  | 2,00  | 34    | #NIČ! |       |       |
| 456 | 2 6195815     | 5     | 6     | 6     | 6     | 6     | 6     | 6     | 6     | 6     | 6     | 6     | 6     | 6     | 6     | 6     | 4     | 6     | 3     | 4     | 3     | 2     | 3     | 3     | 2     | 7     | #NIČ!    | 2        | 4     | 1     | 4,82     | #NIČ! | #NIČ! | 34    | #NIČ! |       |       |
| 457 | 2 6576375     | 2     | 4     | 4     | 4     | 3     | 5     | 4     | 3     | 3     | 4     | 3     | 4     | 4     | 4     | 2     | 2     | 2     | 1     | 4     | 5     | 2     | 2     | 4     | 2     | 7     | #NIČ!    | 1        | 5     | 2     | 2,35     | #NIČ! | #NIČ! | 34    | #NIČ! |       |       |
| 458 | 0 4294431     | #NIČ! | #NIČ! | #NIČ! | #NIČ! | #NIČ! | #NIČ! | #NIČ! | #NIČ! | #NIČ! | #NIČ! | #NIČ! | #NIČ! | #NIČ! | #NIČ! | #NIČ! | #NIČ! | #NIČ! | #NIČ! | #NIČ! | #NIČ! | #NIČ! | #NIČ! | #NIČ! | #NIČ! | #NIČ! | #NIČ!    | #NIČ!    | #NIČ! | #NIČ! | #NIČ!    | #NIČ! | #NIČ! | #NIČ! | #NIČ! | #NIČ! | #NIČ! |
| 459 | 2 1743032     | 6     | 6     | 6     | 6     | 5     | 4     | 4     | 5     | 5     | 5     | 5     | 5     | 5     | 7     | 6     | 5     | 6     | 3     | 4     | 4     | 4     | 3     | 3     | 3     | 5     | #NIČ!    | 4        | 2     | 2     | 4,35     | #NIČ! | 1,00  | 34    | #NIČ! |       |       |
| 461 | 2 5831866     | 7     | 7     | 7     | 7     | 7     | 7     | 7     | 7     | 7     | 7     | 7     | 7     | 7     | 7     | 7     | 7     | 7     | 5     | 5     | 5     | 5     | 5     | 5     | 3     | 3     | 1        | 5        | 1     | 6,00  | 3,00     | 5,00  | 34    | #NIČ! |       |       |       |
| 462 | 2 3930233     | 7     | 7     | 7     | 7     | 7     | 7     | 7     | 7     | 7     | 7     | 7     | 7     | 7     | 7     | 7     | 7     | 7     | 5     | 5     | 5     | 5     | 5     | 5     | 5     | 6     | 5        | 3        | 3     | 2     | 6,00     | 5,00  | 3,00  | 34    | #NIČ! |       |       |
| 463 | 2 2155566     | 4     | 5     | 7     | 7     | 7     | 7     | 7     | 7     | 7     | 7     | 7     | 7     | 7     | 7     | 6     | 7     | 7     | 5     | 4     | 5     | 5     | 5     | 5     | 3     | 17    | 2        | 2        | 2     | 2     | 5,65     | 17,00 | 1,00  | 34    | #NIČ! |       |       |
| 464 | 2 8987135     | 5     | 6     | 7     | 6     | 6     | 6     | 6     | 6     | 7     | 5     | 6     | 7     | 6     | 6     | 6     | 6     | 6     | 3     | 4     | 4     | 4     | 4     | 4     | 2     | #NIČ! | radiolog | 1        | 5     | 1     | 5,12     | 98,00 | 7,00  | 15    | 1,00  |       |       |
| 465 | 2 8468975     | 4     | 6     | 7     | 4     | 4     | 4     | 4     | 3     | 4     | 4     | 3     | 7     | 4     | 4     | 7     | 1     | 6     | 2     | 5     | 5     | 1     | 3     | 4     | 2     | 1     | 6        | 2        | 2     | 3,47  | 6,00     | 3,00  | 34    | #NIČ! |       |       |       |
| 466 | 2 5383470     | 6     | 7     | 7     | 6     | 5     | 5     | 5     | 5     | 4     | 6     | 5     | 5     | 5     | 7     | 6     | 4     | 7     | 3     | 4     | 4     | 3     | 3     | 3     | 3     | 2     | 9        | 2        | 2     | 2     | 4,59     | 9,00  | 1,00  | 34    | #NIČ! |       |       |
| 467 | 2 1510425     | 7     | 7     | 7     | 6     | 7     | 6     | 6     | 6     | 7     | 7     | 7     | 7     | 7     | 6     | 6     | 6     | 6     | 4     | 4     | 5     | 5     | 5     | 5     | 3     | 7     | 2        | 4        | 2     | 2     | 5,53     | 7,00  | 4,00  | 34    | #NIČ! |       |       |
| 468 | 2 1401715     | 6     | 7     | 7     | 7     | 6     | 7     | 6     | 6     | 6     | 7     | 6     | 7     | 6     | 7     | 7     | 6     | 7     | 4     | 5     | 5     | 4     | 4     | 5     | 5     | 2     | 9        | 3        | 4     | 1     | 5,53     | 9,00  | 1,00  | 34    | #NIČ! |       |       |
| 469 | 2 2477302     | 6     | 5     | 7     | 5     | 5     | 6     | 5     | 5     | 4     | 6     | 6     | 3     | 6     | 6     | 4     | 4     | 6     | 5     | 3     | 3     | 3     | 4     | 4     | 4     | 3     | 2        | 2        | 2     | 2     | 4,24     | 2,00  | 5,00  | 34    | #NIČ! |       |       |
| 470 | #NIČ! 8181364 | #NIČ! | #NIČ! | #NIČ! | #NIČ! | #NIČ! | #NIČ! | #NIČ! | #NIČ! | #NIČ! | #NIČ! | #NIČ! | #NIČ! | #NIČ! | #NIČ! | #NIČ! | #NIČ! | #NIČ! | #NIČ! | #NIČ! | #NIČ! | #NIČ! | #NIČ! | #NIČ! | #NIČ! | #NIČ! | #NIČ!    | #NIČ!    | #NIČ! | #NIČ! | #NIČ!    | #NIČ! | #NIČ! | #NIČ! | #NIČ! | #NIČ! | #NIČ! |
| 471 | 2 3474914     | 6     | 7     | 7     | 7     | 7     | 7     | 7     | 6     | 7     | 7     | 7     | 7     | 7     | 7     | 6     | 6     | 7     | 3     | 4     | 5     | 5     | 5     | 4     | 1     | #NIČ! | INFORM   | #NIČ!    | JO330 | #NIČ! | 3.letnik | 2     | 5,76  | 98,00 | 7,00  | 12    | 1,00  |
| 472 | 2 2830479     | 7     | 7     | 7     | 7     | 6     | 7     | 6     | 7     | 7     | 7     | 7     | 7     | 7     | 6     | 6     | 6     | 6     | 4     | 5     | 4     | 4     | 4     | 5     | 4     | 9     | 3        | 4        | 2     | 2     | 5,65     | 9,00  | 1,00  | 34    | #NIČ! |       |       |
| 473 | 2 3727654     | 4     | 6     | 7     | 5     | 6     | 7     | 4     | 4     | 7     | 7     | 7     | 7     | 7     | 6     | 3     | 7     | 7     | 4     | 4     | 5     | 2     | 2     | 4     | 2     | 8     | #NIČ!    | adminis' | 4     | 3     | 1        | 4,94  | 98,00 | 7,00  | 1     | 1,00  |       |
| 474 | 2 146834      | 4     | 4     | 5     | 5     | 5     | 5     | 5     | 5     | 4     | 5     | 5     | 5     | 4     | 5     | 4     | 4     | 4     | 3     | 3     | 3     | 3     | 3     | 3     | 3     | 4     | 7        | 2        | 4     | 2     | 3,59     | 7,00  | 4,00  | 34    | #NIČ! |       |       |
| 475 | 2 9551206     | 4     | 5     | 7     | 4     | 2     | 6     | 1     | 2     | 1     | 1     | 7     | 5     | 1     | 5     | 5     | 2     | 6     | 2     | 5     | 4     | 2     | 2     | 2     | 1     | 2     | 9        | 2        | 4     | 2     | 2,76     | 9,00  | 1,00  | 34    | #NIČ! |       |       |
| 476 | 2 7315529     | 6     | 7     | 7     | 6     | 6     | 7     | 6     | 6     | 5     | 5     | 6     | 4     | 4     | 7     | 6     | 4     | 7     | 2     | 3     | 3     | 3     | 2     | 2     | 2     | 4     | 8        | 3        | 4     | 2     | 4,82     | 8,00  | 1,00  | 34    | #NIČ! |       |       |
| 477 | 2 7924027     | 7     | 7     | 7     | 6     | 6     | 5     | 5     | 5     | 6     | 6     | 5     | 6     | 6     | 6     | 5     | 6     | 6     | 3     | 4     | 3     | 3     | 4     | 3     | 3     | 5     | 1        | 2        | 2     | 2     | 4,88     | 1,00  | 2,00  | 34    | #NIČ! |       |       |
| 478 | 2 7673550     | 6     | 7     | 7     | 6     | 5     | 7     | 6     | 5     | 4     | 5     | 5     | 5     | 5     | 7     | 6     | 4     | 7     | 4     | 4     | 4     | 3     | 3     | 4     | 3     | 2     | 9        | 3        | 4     | 2     | 4,71     | 9,00  | 1,00  | 34    | #NIČ! |       |       |
| 479 | 2 4595667     | 5     | 7     | 7     | 6     | 6     | 6     | 5     | 5     | 5     | 7     | 6     | 6     | 6     | 5     | 5     | 5     | 6     | 2     | 4     | 4     | 3     | 2     | 2     | 2     | 3     | 6        | 2        | 2     | 2     | 4,76     | 6,00  | 3,00  | 34    | #NIČ! |       |       |
| 480 | 2 9957685     | 6     | 7     | 7     | 7     | 6     | 7     | 6     | 6     | 7     | 7     | 6     | 6     | 6     | 6     | 7     | 6     | 6     | 3     | 5     | 5     | 3     | 3     | 3     | 3     | 3     | 6        | 2        | 2     | 2     | 5,41     | 6,00  | 3,00  | 34    | #NIČ! |       |       |
| 481 | 2 6001425     | 4     | 5     | 5     | 4     | 4     | 4     | 3     | 3     | 2     | 3     | 3     | 2     | 2     | 3     | 3     | 1     | 3     | 1     | 2     | 3     | 2     | 2     | 2     | 2     | 3     | 6        | 1        | 4     | 2     | 2,18     | 6,00  | 3,00  | 34    | #NIČ! |       |       |
| 482 | 2 134069      | 6     | 6     | 7     | 6     | 5     | 4     | 4     | 6     | 5     | 5     | 6     | 6     | 6     | 5     | 5     | 6     | 6     | 3     | 4     | 5     | 4     | 4     | 3     | 3     | 7     | #NIČ!    | SNMP     | 4     | 2     | 2        | 4,53  | 98,00 | 7,00  | 21    | 1,00  |       |
| 483 | #NIČ! 2666070 | #NIČ! | #NIČ! | #NIČ! | #NIČ! | #NIČ! | #NIČ! | #NIČ! | #NIČ! | #NIČ! | #NIČ! | #NIČ! | #NIČ! | #NIČ! | #NIČ! | #NIČ! | #NIČ! | #NIČ! | #NIČ! | #NIČ! | #NIČ! | #NIČ! | #NIČ! | #NIČ! | #NIČ! | #NIČ! | #NIČ!    | #NIČ!    | #NIČ! | #NIČ! | #NIČ!    | #NIČ! | #NIČ! | #NIČ! | #NIČ! | #NIČ! | #NIČ! |
| 484 | 2 2928142     | 4     | 6     | 6     | 5     | 4     | 6     | 4     | 5     | 6     | 6     | 6     | 5     | 5     | 6     | 5     | 4     | 7     | 4     | 2     | 3     | 2     | 2     | 4     | 2     | 6     | #NIČ!    | ambular  | 1     | 5     | 2        | 4,29  | 98,00 | 7,00  | 6     | 1,00  |       |
| 485 | 2 6642504     | 3     | 6     | 5     | 4     | 4     | 5     | 4     | 4     | 5     | 5     | 4     | 3     | 4     | 4     | 3     | 2     | 6     | 3     | 3     | 3     | 3     | 3     | 3     | 3     | 4     | 1        | 1        | 5     | 2     | 3,18     | 1,00  | 2,00  | 34    | #NIČ! |       |       |
| 486 | 2 4428091     | 6     | 7     | 7     | 7     | 6     | 7     | 6     | 6     | 6     | 6     | 6     | 7     | 6     | 7     | 7     | 6     | 7     | 4     | 4     | 4     | 4     | 4     | 4     | 4     | 5     | 1        | 2        | 4     | 1     | 5,47     | 1,00  | 2,00  | 34    | #NIČ! |       |       |
| 487 | 2 2212945     | 5     | 6     | 7     | 6     | 6     | 6     | 5     | 5     | 5     | 5     | 6     | 6     | 6     | 6     | 6     | 5     | 6     | 2     | 3     | 3     | 4     | 4     | 5     | 4     | 6     | 7        | 2        | 4     | 2     | 4,71     | 7,00  | 4,00  | 34    | #NIČ! |       |       |
| 488 | 2 7780454     | 3     | 6     | 6     | 4     | 4     | 3     | 3     | 3     | 1     | 4     | 2     | 3     | 4     | 4     | 4     | 4     | 5     | 2     | 3     | 3     | 3     | 3     | 3     | 3     | 7     | #NIČ!    | snmp     | 2     | 2     | 2        | 2,71  | 98,00 | 7,00  | 19    | 1,00  |       |
| 489 | #NIČ! 2263433 | #NIČ! | #NIČ! | #NIČ! | #NIČ! | #NIČ! | #NIČ! | #NIČ! | #NIČ! | #NIČ! | #NIČ! | #NIČ! | #NIČ! | #NIČ! | #NIČ! | #NIČ! | #NIČ! | #NIČ! | #NIČ! | #NIČ! | #NIČ! | #NIČ! | #NIČ! | #NIČ! | #NIČ! | #NIČ! | #NIČ!    | #NIČ!    | #NIČ! | #NIČ! | #NIČ!    | #NIČ! | #NIČ! | #NIČ! | #NIČ! | #NIČ! | #NIČ! |
| 490 | 2 7975803     | 5     | 6     | 6     | 5     | 5     | 5     | 5     | 5     | 6     | 5     | 5     | 5     | 5     | 5     | 5     | 5     | 5     | 3     | 3     | 3     | 3     | 3     | 3     | 3     | 4     | 1</      |          |       |       |          |       |       |       |       |       |       |

|     |               |       |       |       |       |       |       |       |       |       |       |       |       |       |       |       |       |       |       |       |       |       |       |       |       |       |              |       |       |       |       |       |       |       |       |       |       |       |
|-----|---------------|-------|-------|-------|-------|-------|-------|-------|-------|-------|-------|-------|-------|-------|-------|-------|-------|-------|-------|-------|-------|-------|-------|-------|-------|-------|--------------|-------|-------|-------|-------|-------|-------|-------|-------|-------|-------|-------|
| 495 | 2 181487      | 6     | 7     | 7     | 6     | 6     | 4     | 6     | 6     | 6     | 6     | 5     | 6     | 6     | 7     | 6     | 5     | 7     | 4     | 5     | 5     | 5     | 5     | 4     | 3     | 3     | 8            | 3     | 4     | 2     | 5,00  | 8,00  | 1,00  | 34    | #NiČ! |       |       |       |
| 497 | 2 9832024     | 7     | 7     | 7     | 7     | 7     | 7     | 7     | 7     | 7     | 7     | 7     | 7     | 7     | 7     | 7     | 7     | 7     | 5     | 5     | 5     | 5     | 5     | 5     | 5     | 1     | 11           | 3     | 4     | 2     | 6,00  | 11,00 | 1,00  | 34    | #NiČ! |       |       |       |
| 498 | 2 8615658     | 3     | 4     | 6     | 4     | 4     | 5     | 5     | 4     | 4     | 5     | 5     | 4     | 4     | 5     | 3     | 4     | 4     | 2     | 3     | 3     | 2     | 3     | 3     | 3     | 1     | 2            | 1     | 5     | 2     | 3,29  | 2,00  | 5,00  | 34    | #NiČ! |       |       |       |
| 499 | 2 3582217     | 5     | 7     | 7     | 6     | 7     | 7     | 6     | 7     | 6     | 7     | 7     | 6     | 6     | 6     | 6     | 6     | 6     | 3     | 3     | 3     | 2     | 3     | 3     | 3     | 3     | 2            | 2     | 4     | 2     | 5,35  | 2,00  | 5,00  | 34    | #NiČ! |       |       |       |
| 500 | 2 2064111     | 4     | 6     | 7     | 5     | 6     | 6     | 5     | 4     | 4     | 6     | 5     | 6     | 6     | 5     | 5     | 4     | 7     | 3     | 5     | 5     | 4     | 4     | 4     | 4     | 2     | 15           | 2     | 2     | 4,35  | 15,00 | 1,00  | 34    | #NiČ! |       |       |       |       |
| 501 | 2 9573904     | 2     | 3     | 3     | 7     | 3     | 2     | 3     | 3     | 2     | 3     | 2     | 2     | 2     | 1     | 3     | 1     | 2     | 2     | 2     | 2     | 2     | 2     | 1     | 2     | 1     | 4            | 2     | 2     | 1,59  | 4,00  | 6,00  | 34    | #NiČ! |       |       |       |       |
| 502 | 2 1677189     | 5     | 7     | 7     | 5     | 7     | 6     | 6     | 6     | 6     | 5     | 6     | 6     | 7     | 7     | 5     | 6     | 7     | 4     | 3     | 5     | 5     | 4     | 3     | 4     | 1     | 5            | 1     | 3     | 2     | 5,12  | 5,00  | 3,00  | 34    | #NiČ! |       |       |       |
| 503 | 2 9664231     | 4     | 5     | 7     | 6     | 5     | 7     | 5     | 4     | 4     | 7     | 6     | 7     | 6     | 5     | 4     | 6     | 7     | 2     | 4     | 5     | 2     | 3     | 1     | 3     | 4     | 26           | 2     | 4     | 2     | 4,59  | 26,00 | 1,00  | 34    | #NiČ! |       |       |       |
| 504 | 2 3289589     | 5     | 6     | 6     | 5     | 5     | 4     | 5     | 3     | 5     | 7     | 5     | 2     | 6     | 5     | 2     | 5     | 5     | 3     | 3     | 3     | 3     | 2     | 2     | 2     | 1     | 7            | 2     | 5     | 2     | 3,76  | 7,00  | 4,00  | 34    | #NiČ! |       |       |       |
| 505 | 2 7455253     | 6     | 7     | 7     | 5     | 5     | 6     | 4     | 4     | 4     | 4     | 4     | 6     | 5     | 4     | 3     | 4     | 5     | 2     | 3     | 3     | 3     | 3     | 3     | 3     | 4     | 17           | 2     | 2     | 2     | 3,88  | 17,00 | 1,00  | 34    | #NiČ! |       |       |       |
| 506 | 2 7407499     | 6     | 6     | 7     | 6     | 5     | 5     | 5     | 6     | 6     | 5     | 6     | 4     | 4     | 5     | 5     | 3     | 4     | 3     | 5     | 5     | 3     | 3     | 4     | 3     | 4     | 17           | 2     | 4     | 2     | 4,18  | 17,00 | 1,00  | 34    | #NiČ! |       |       |       |
| 507 | #NiČ! 4671736 | #NiČ! | #NiČ! | #NiČ! | #NiČ! | #NiČ! | #NiČ! | #NiČ! | #NiČ! | #NiČ! | #NiČ! | #NiČ! | #NiČ! | #NiČ! | #NiČ! | #NiČ! | #NiČ! | #NiČ! | #NiČ! | #NiČ! | #NiČ! | #NiČ! | #NiČ! | #NiČ! | #NiČ! | #NiČ! | #NiČ!        | #NiČ! | #NiČ! | #NiČ! | #NiČ! | #NiČ! | #NiČ! | #NiČ! | #NiČ! | #NiČ! | #NiČ! |       |
| 508 | 2 1136184     | 7     | 7     | 7     | 7     | 7     | 7     | 7     | 7     | 7     | 7     | 7     | 7     | 6     | 7     | 6     | 6     | 7     | 3     | 5     | 5     | 4     | 5     | 5     | 5     | 3     | 4            | 2     | 2     | 2     | 5,82  | 4,00  | 6,00  | 34    | #NiČ! |       |       |       |
| 509 | 2 1665713     | 7     | 7     | 7     | 7     | 7     | 6     | 7     | 7     | 7     | 7     | 7     | 7     | 7     | 7     | 5     | 5     | 5     | 2     | 5     | 5     | 4     | 4     | 2     | 3     | 4     | 7            | 2     | 4     | 2     | 5,59  | 7,00  | 4,00  | 34    | #NiČ! |       |       |       |
| 510 | 2 4920011     | 6     | 5     | 6     | 6     | 5     | 6     | 6     | 4     | 6     | 6     | 6     | 5     | 6     | 6     | 4     | 5     | 6     | 2     | 4     | 3     | 2     | 3     | 3     | 2     | 6     | 11           | 1     | 5     | 1     | 4,53  | 11,00 | 1,00  | 34    | #NiČ! |       |       |       |
| 511 | #NiČ! 9602918 | #NiČ! | #NiČ! | #NiČ! | #NiČ! | #NiČ! | #NiČ! | #NiČ! | #NiČ! | #NiČ! | #NiČ! | #NiČ! | #NiČ! | #NiČ! | #NiČ! | #NiČ! | #NiČ! | #NiČ! | #NiČ! | #NiČ! | #NiČ! | #NiČ! | #NiČ! | #NiČ! | #NiČ! | #NiČ! | #NiČ!        | #NiČ! | #NiČ! | #NiČ! | #NiČ! | #NiČ! | #NiČ! | #NiČ! | #NiČ! | #NiČ! | #NiČ! |       |
| 512 | 2 3254556     | 6     | 6     | 6     | 6     | 6     | 6     | 6     | 5     | 6     | 6     | 5     | 5     | 5     | 5     | 6     | 5     | 5     | 4     | 4     | 4     | 4     | 3     | 4     | 4     | 6     | 1            | 2     | 4     | 1     | 4,59  | 1,00  | 2,00  | 34    | #NiČ! |       |       |       |
| 513 | 2 7464026     | 4     | 7     | 6     | 6     | 6     | 7     | 6     | 7     | 6     | 7     | 6     | 6     | 7     | 6     | 7     | 6     | 7     | 3     | 5     | 5     | 4     | 4     | 5     | 5     | 3     | 5            | 3     | 2     | 1     | 5,41  | 5,00  | 3,00  | 34    | #NiČ! |       |       |       |
| 514 | 2 7556464     | 6     | 7     | 6     | 6     | 6     | 5     | 5     | 6     | 6     | 6     | 6     | 6     | 6     | 6     | 4     | 5     | 6     | 3     | 4     | 4     | 4     | 4     | 3     | 4     | 2     | 6            | 1     | 4     | 1     | 4,76  | 6,00  | 3,00  | 34    | #NiČ! |       |       |       |
| 516 | #NiČ! 5390243 | #NiČ! | #NiČ! | #NiČ! | #NiČ! | #NiČ! | #NiČ! | #NiČ! | #NiČ! | #NiČ! | #NiČ! | #NiČ! | #NiČ! | #NiČ! | #NiČ! | #NiČ! | #NiČ! | #NiČ! | #NiČ! | #NiČ! | #NiČ! | #NiČ! | #NiČ! | #NiČ! | #NiČ! | #NiČ! | #NiČ!        | #NiČ! | #NiČ! | #NiČ! | #NiČ! | #NiČ! | #NiČ! | #NiČ! | #NiČ! | #NiČ! | #NiČ! |       |
| 517 | 2 4281822     | 6     | 7     | 5     | 6     | 5     | 4     | 4     | 4     | 5     | 5     | 5     | 5     | 5     | 4     | 4     | 6     | 2     | 3     | 3     | 2     | 2     | 2     | 2     | 3     | #NiČ! | #NiČ!        | #NiČ! | #NiČ! | #NiČ! | #NiČ! | #NiČ! | #NiČ! | #NiČ! | #NiČ! | #NiČ! | #NiČ! |       |
| 518 | 2 5238383     | 5     | 6     | 6     | 5     | 6     | 4     | 5     | 6     | 5     | 7     | 4     | 4     | 6     | 5     | 4     | 4     | 4     | 3     | 4     | 5     | 4     | 4     | 5     | 4     | 4     | 7            | 2     | 3     | 1     | 4,06  | 7,00  | 4,00  | 34    | #NiČ! |       |       |       |
| 519 | 2 3346446     | 7     | 7     | 7     | 6     | 7     | 7     | 7     | 7     | 7     | 7     | 7     | 7     | 7     | 7     | 7     | 7     | 7     | 5     | 5     | 4     | 5     | 5     | 5     | 5     | 3     | 3            | 2     | 2     | 2     | 5,94  | 3,00  | 5,00  | 34    | #NiČ! |       |       |       |
| 520 | 2 1017084     | 6     | 6     | 7     | 6     | 5     | 5     | 5     | 5     | 5     | 6     | 5     | 5     | 6     | 5     | 6     | 5     | 6     | 4     | 3     | 5     | 4     | 3     | 3     | 3     | 2     | 17           | 2     | 2     | 2     | 4,53  | 17,00 | 1,00  | 34    | #NiČ! |       |       |       |
| 521 | 2 5046080     | 6     | 7     | 7     | 6     | 6     | 5     | 6     | 6     | 6     | 7     | 5     | 7     | 6     | 7     | 6     | 3     | 7     | 1     | 5     | 5     | 4     | 3     | 4     | 4     | 1     | 7            | 2     | 4     | 2     | 5,06  | 7,00  | 4,00  | 34    | #NiČ! |       |       |       |
| 522 | 2 2179150     | 7     | 7     | 7     | 7     | 7     | 7     | 6     | 7     | 6     | 7     | 7     | 7     | 7     | 7     | 6     | 7     | 7     | 4     | 4     | 4     | 4     | 3     | 4     | 5     | 1     | 1            | 2     | 4     | 2     | 5,88  | 1,00  | 2,00  | 34    | #NiČ! |       |       |       |
| 523 | 2 5757508     | 6     | 6     | 6     | 6     | 6     | 6     | 6     | 6     | 6     | 6     | 6     | 6     | 6     | 7     | 6     | 6     | 6     | 7     | 6     | 5     | 6     | 3     | 4     | 5     | 4     | 4            | 4     | 2     | 9     | 3     | 4     | 2     | 5,06  | 9,00  | 1,00  | 34    | #NiČ! |
| 524 | 2 2250093     | 5     | 7     | 7     | 6     | 6     | 6     | 7     | 4     | 7     | 7     | 7     | 6     | 6     | 5     | 5     | 3     | 7     | 2     | 4     | 5     | 4     | 3     | 5     | 5     | 3     | 1            | 2     | 5     | 2     | 4,94  | 1,00  | 2,00  | 34    | #NiČ! |       |       |       |
| 525 | #NiČ! 3977939 | #NiČ! | #NiČ! | #NiČ! | #NiČ! | #NiČ! | #NiČ! | #NiČ! | #NiČ! | #NiČ! | #NiČ! | #NiČ! | #NiČ! | #NiČ! | #NiČ! | #NiČ! | #NiČ! | #NiČ! | #NiČ! | #NiČ! | #NiČ! | #NiČ! | #NiČ! | #NiČ! | #NiČ! | #NiČ! | #NiČ!        | #NiČ! | #NiČ! | #NiČ! | #NiČ! | #NiČ! | #NiČ! | #NiČ! | #NiČ! | #NiČ! | #NiČ! |       |
| 526 | 2 3139418     | 6     | 7     | 6     | 6     | 6     | 5     | 5     | 5     | 5     | 6     | 5     | 5     | 6     | 6     | 5     | 5     | 4     | 4     | 5     | 4     | 4     | 3     | 3     | 2     | 6     | 2            | 2     | 2     | 2     | 4,53  | 6,00  | 3,00  | 34    | #NiČ! |       |       |       |
| 527 | 2 3763271     | 7     | 7     | 7     | 7     | 7     | 7     | 7     | 7     | 7     | 7     | 7     | 7     | 7     | 7     | 7     | 7     | 7     | 5     | 5     | 5     | 5     | 5     | 5     | 6     | 1     | 2            | 2     | 1     | 2     | 6,00  | 1,00  | 2,00  | 34    | #NiČ! |       |       |       |
| 528 | #NiČ! 9398104 | #NiČ! | #NiČ! | #NiČ! | #NiČ! | #NiČ! | #NiČ! | #NiČ! | #NiČ! | #NiČ! | #NiČ! | #NiČ! | #NiČ! | #NiČ! | #NiČ! | #NiČ! | #NiČ! | #NiČ! | #NiČ! | #NiČ! | #NiČ! | #NiČ! | #NiČ! | #NiČ! | #NiČ! | #NiČ! | #NiČ!        | #NiČ! | #NiČ! | #NiČ! | #NiČ! | #NiČ! | #NiČ! | #NiČ! | #NiČ! | #NiČ! | #NiČ! |       |
| 529 | 2 5700707     | 5     | 6     | 6     | 5     | 5     | 4     | 6     | 5     | 4     | 5     | 5     | 4     | 4     | 4     | 3     | 3     | 4     | 2     | 5     | 3     | 3     | 3     | 3     | 2     | 5     | 8            | 3     | 4     | 1     | 3,59  | 8,00  | 1,00  | 34    | #NiČ! |       |       |       |
| 530 | #NiČ! 309221  | #NiČ! | #NiČ! | #NiČ! | #NiČ! | #NiČ! | #NiČ! | #NiČ! | #NiČ! | #NiČ! | #NiČ! | #NiČ! | #NiČ! | #NiČ! | #NiČ! | #NiČ! | #NiČ! | #NiČ! | #NiČ! | #NiČ! | #NiČ! | #NiČ! | #NiČ! | #NiČ! | #NiČ! | #NiČ! | #NiČ!        | #NiČ! | #NiČ! | #NiČ! | #NiČ! | #NiČ! | #NiČ! | #NiČ! | #NiČ! | #NiČ! | #NiČ! |       |
| 531 | 2 4443985     | 4     | 6     | 7     | 5     | 4     | 4     | 3     | 4     | 3     | 3     | 3     | 4     | 2     | 3     | 6     | 2     | 6     | 4     | 3     | 3     | 3     | 3     | 3     | 2     | 1     | 26           | 2     | 3     | 2     | 3,06  | 26,00 | 1,00  | 34    | #NiČ! |       |       |       |
| 532 | 2 1292261     | 5     | 7     | 7     | 7     | 6     | 6     | 6     | 6     | 7     | 7     | 7     | 6     | 6     | 7     | 6     | 6     | 7     | 5     | 5     | 5     | 5     | 4     | 4     | 3     | 23    | 2            | 2     | 2     | 2     | 5,41  | 98,00 | 1,00  | 34    | #NiČ! |       |       |       |
| 533 | 2 3129352     | 5     | 6     | 7     | 6     | 4     | 7     | 5     | 5     | 3     | 6     | 7     | 3     | 4     | 6     | 6     | 4     | 6     | 2     | 4     | 3     | 3     | 3     | 4     | 2     | 3     | 1            | 1     | 5     | 2     | 4,29  | 1,00  | 2,00  | 34    | #NiČ! |       |       |       |
| 534 | 2 1769979     | 7     | 7     | 7     | 7     | 7     | 7     | 7     | 7     | 6     | 7     | 6     | 7     | 6     | 7     | 6     | 6     | 5     | 4     | 5     | 4     | 4     | 4     | 4     | 3     | 4     | 1            | 5     | 1     | 5     | 1     | 5,65  | 4,00  | 6,00  | 34    | #NiČ! |       |       |
| 535 | 2 9461836     | 4     | 7     | 7     | 5     | 3     | 7     | 4     | 4     | 1     | 7     | 6     | 3     | 4     | 6     | 2     | 4     | 7     | 2     | 3     | 3     | 2     | 3     | 3     | 2     | 6     | 1            | 1     | 5     | 2     | 3,76  | 1,00  | 2,00  | 34    | #NiČ! |       |       |       |
| 536 | 2 1999244     | 3     | 7     | 7     | 5     | 5     | 5     | 5     | 4     | 4     | 6     | 4     | 5     | 5     | 5     | 4     | 4     | 5     | 3     | 3     | 3     | 3     | 3     | 1     | 2     | 3     | 5            | 1     | 4     | 2     | 3,88  | 5,00  | 3,00  | 34    | #NiČ! |       |       |       |
| 537 | 2 1610715     | 7     | 7     | 7     | 7     | 5     | 7     | 5     | 5     | 5     | 7     | 7     | 7     | 7     | 7     | 5     | 5     | 7     | 3     | 3     | 3     | 3     | 2     | 3     | 3     | 2     | 17           | 1     | 5     | 2     | 5,29  | 17,00 | 1,00  | 34    | #NiČ! |       |       |       |
| 538 | 2 2055841     | 7     | 7     | 7     | 7     | 7     | 7     | 7     | 7     | 6     | 6     | 6     | 6     | 7     | 4     | 1     | 4     | 1     | 5     | 5     | 3     | 2     | 1     | 2     | 6     | 2     | 1            | 5     | 2     | 2     | 5,06  | 2,00  | 5,00  | 34    | #NiČ! |       |       |       |
| 539 | 2 5447060     | 6     | 6     | 7     | 6     | 6     | 5     | 5     | 6     | 6     | 6     | 6     | 6     | 6     | 6     | 5     | 6     | 6     | 4     | 4     | 4     | 4     | 5     | 4     | 3     | 2     | 2            | 4     | 1     | 4,88  | 2,00  | 5,00  | 34    | #NiČ! |       |       |       |       |
| 540 | 2 1067779     | 4     | 7     | 6     | 6     | 7     | 6     | 6     | 7     | 7     | 6     | 6     | 2     | 5     | 6     | 7     | 7     | 3     | 5     | 2     | 4     | 4     | 3     | 3     | 5     | 3     | 1            | 2     | 2     | 4,71  | 1,00  | 2,00  | 34    | #NiČ! |       |       |       |       |
| 541 | 2 8997713     | 7     | 7     | 7     | 7     | 7     | 7     | 7     | 7     | 7     | 7     | 7     | 7     | 7     | 7     | 7     | 7     | 7     | 5     | 5     | 5     | 5     | 5     | 5     | 5     | 3     | 5            | 2     | 2     | 2     | 6,00  | 5,00  | 3,00  | 34    | #NiČ! |       |       |       |
| 542 | 2 1785228     | 6     | 7     | 7     | 7     | 7     | 6     | 6     | 7     | 6     | 7     | 7     | 6     | 7     | 7     | 6     | 6     | 7     | 3     | 4     | 4     | 3     | 3     | 4     | 4     | 7     | #NiČ! Ambula | 2     | 2     | 2     | 5,59  | 98,00 | 7,00  | 5     | 1,00  |       |       |       |
| 543 | 2 1933003     | 6     | 7     | 6     | 6     | 7     | 6     | 5     | 4     | 6     | 5     | 5     | 6     | 6     | 6     | 4     | 5     | 2     | 3     | 4     | 3     | 3     | 2     | 3     | 4     | 12    | 5            | 6     | 1     | 4,65  | 12,00 | 1,00  | 34    | #NiČ! |       |       |       |       |
| 544 | 0 4309331     | #NiČ! | #NiČ! | #NiČ! | #NiČ! | #NiČ! | #NiČ! | #NiČ! | #NiČ! | #NiČ! | #NiČ! | #NiČ! | #NiČ! | #NiČ! | #NiČ! | #NiČ! | #NiČ! | #NiČ! | #NiČ! | #NiČ! | #NiČ! | #NiČ! | #NiČ! | #NiČ! | #NiČ! | #NiČ! | #NiČ!        | #NiČ! | #NiČ! | #NiČ! | #NiČ! | #NiČ! | #NiČ! | #NiČ! | #NiČ! | #NiČ! | #NiČ! |       |
| 545 | 2 5747645     | 4     | 6     | 6     | 5     | 5     | 7     | 5     | 5     | 4     | 5     | 6     | 6     | 6     | 5     | 5     | 3     | 5     | 4     | 3     | 5     | 5     | 5     | 5     | 1     | 1     | 1            | 1     | 5     | 1     | 4,18  | 1,00  | 2,00  | 34    | #NiČ! |       |       |       |
| 546 | 2 5810234     | 7     | 7     | 7     | 7     | 7     | 7     | 7     | 7     | 7     | 7     | 6     | 7     | 7     | 6     | 7     | 6     | 7     | 5     | 4     | 5     | 5     | 5     | 4     | 4     | 3     | 12           | 3     |       |       |       |       |       |       |       |       |       |       |

|     |               |       |       |       |       |       |       |       |       |       |       |       |       |       |       |       |       |       |       |       |       |       |       |       |       |       |               |       |       |       |       |       |       |       |       |       |       |       |
|-----|---------------|-------|-------|-------|-------|-------|-------|-------|-------|-------|-------|-------|-------|-------|-------|-------|-------|-------|-------|-------|-------|-------|-------|-------|-------|-------|---------------|-------|-------|-------|-------|-------|-------|-------|-------|-------|-------|-------|
| 551 | 2 3651217     | 6     | 7     | 7     | 7     | 7     | 6     | 7     | 6     | 6     | 7     | 6     | 6     | 6     | 7     | 7     | 4     | 7     | 5     | 4     | 5     | 5     | 5     | 5     | 5     | 6     | 14            | 2     | 4     | 2     | 5,41  | 14,00 | 1,00  | 34    | #NiČ! |       |       |       |
| 552 | #NiČ! 3335589 | #NiČ! | #NiČ! | #NiČ! | #NiČ! | #NiČ! | #NiČ! | #NiČ! | #NiČ! | #NiČ! | #NiČ! | #NiČ! | #NiČ! | #NiČ! | #NiČ! | #NiČ! | #NiČ! | #NiČ! | #NiČ! | #NiČ! | #NiČ! | #NiČ! | #NiČ! | #NiČ! | #NiČ! | #NiČ! | #NiČ!         | #NiČ! | #NiČ! | #NiČ! | #NiČ! | #NiČ! | #NiČ! | #NiČ! | #NiČ! | #NiČ! | #NiČ! |       |
| 553 | #NiČ! 5724294 | #NiČ! | #NiČ! | #NiČ! | #NiČ! | #NiČ! | #NiČ! | #NiČ! | #NiČ! | #NiČ! | #NiČ! | #NiČ! | #NiČ! | #NiČ! | #NiČ! | #NiČ! | #NiČ! | #NiČ! | #NiČ! | #NiČ! | #NiČ! | #NiČ! | #NiČ! | #NiČ! | #NiČ! | #NiČ! | #NiČ!         | #NiČ! | #NiČ! | #NiČ! | #NiČ! | #NiČ! | #NiČ! | #NiČ! | #NiČ! | #NiČ! | #NiČ! |       |
| 554 | 2 8614702     | 7     | 7     | 7     | 7     | 7     | 7     | 5     | 7     | 5     | 7     | 5     | 6     | 6     | 7     | 7     | 3     | 7     | 3     | 5     | 5     | 5     | 5     | 5     | 5     | 6     | 5             | 2     | 2     | 2     | 5,29  | 5,00  | 3,00  | 34    | #NiČ! |       |       |       |
| 555 | #NiČ! 5900629 | #NiČ! | #NiČ! | #NiČ! | #NiČ! | #NiČ! | #NiČ! | #NiČ! | #NiČ! | #NiČ! | #NiČ! | #NiČ! | #NiČ! | #NiČ! | #NiČ! | #NiČ! | #NiČ! | #NiČ! | #NiČ! | #NiČ! | #NiČ! | #NiČ! | #NiČ! | #NiČ! | #NiČ! | #NiČ! | #NiČ!         | #NiČ! | #NiČ! | #NiČ! | #NiČ! | #NiČ! | #NiČ! | #NiČ! | #NiČ! | #NiČ! | #NiČ! |       |
| 556 | 2 3659040     | 6     | 7     | 7     | 7     | 7     | 7     | 7     | 7     | 7     | 7     | 7     | 7     | 5     | 7     | 5     | 6     | 3     | 7     | 3     | 5     | 5     | 5     | 3     | 3     | 4     | 15            | 3     | 6     | 2     | 5,53  | 15,00 | 1,00  | 34    | #NiČ! |       |       |       |
| 557 | 2 593313      | 5     | 6     | 7     | 6     | 6     | 5     | 6     | 6     | 6     | 6     | 6     | 5     | 6     | 6     | 5     | 4     | 5     | 2     | 4     | 4     | 4     | 3     | 5     | 5     | 2     | 4             | 2     | 3     | 2     | 4,65  | 4,00  | 6,00  | 34    | #NiČ! |       |       |       |
| 558 | 2 1989445     | 4     | 5     | 6     | 5     | 6     | 6     | 4     | 4     | 5     | 6     | 6     | 5     | 4     | 4     | 4     | 4     | 5     | 3     | 4     | 4     | 4     | 4     | 3     | 3     | 2     | 3             | 1     | 5     | 2     | 3,88  | 3,00  | 5,00  | 34    | #NiČ! |       |       |       |
| 559 | 2 8167284     | 5     | 7     | 7     | 6     | 6     | 5     | 7     | 7     | 5     | 7     | 4     | 6     | 7     | 7     | 4     | 4     | 7     | 3     | 5     | 5     | 5     | 5     | 4     | 3     | 4     | 8             | 3     | 5     | 1     | 4,94  | 8,00  | 1,00  | 34    | #NiČ! |       |       |       |
| 560 | 2 4868089     | 6     | 7     | 6     | 6     | 5     | 5     | 7     | 5     | 6     | 7     | 3     | 4     | 4     | 6     | 5     | 1     | 7     | 2     | 3     | 3     | 2     | 2     | 2     | 2     | 6     | 9             | 3     | 3     | 2     | 4,29  | 9,00  | 1,00  | 34    | #NiČ! |       |       |       |
| 561 | 2 9838590     | 4     | 5     | 5     | 4     | 4     | 3     | 3     | 3     | 3     | 3     | 5     | 3     | 2     | 3     | 6     | 3     | 3     | 6     | 2     | 3     | 1     | 1     | 3     | 2     | 2     | 3             | 1     | 2     | 1     | 2,82  | 1,00  | 2,00  | 34    | #NiČ! |       |       |       |
| 562 | 2 4588686     | 6     | 7     | 7     | 7     | 7     | 6     | 6     | 6     | 6     | 7     | 7     | 7     | 7     | 6     | 5     | 6     | 4     | 4     | 3     | 3     | 3     | 1     | 1     | 4     | 5     | 2             | 2     | 2     | 5,53  | 5,00  | 3,00  | 34    | #NiČ! |       |       |       |       |
| 563 | 2 3427660     | 2     | 7     | 4     | 1     | 1     | 2     | 1     | 1     | 1     | 4     | 1     | 6     | 2     | 6     | 2     | 2     | 4     | 2     | 4     | 4     | 4     | 2     | 1     | 1     | 1     | 5             | 2     | 2     | 2     | 1,76  | 5,00  | 3,00  | 34    | #NiČ! |       |       |       |
| 564 | #NiČ! 3372243 | #NiČ! | #NiČ! | #NiČ! | #NiČ! | #NiČ! | #NiČ! | #NiČ! | #NiČ! | #NiČ! | #NiČ! | #NiČ! | #NiČ! | #NiČ! | #NiČ! | #NiČ! | #NiČ! | #NiČ! | #NiČ! | #NiČ! | #NiČ! | #NiČ! | #NiČ! | #NiČ! | #NiČ! | #NiČ! | #NiČ!         | #NiČ! | #NiČ! | #NiČ! | #NiČ! | #NiČ! | #NiČ! | #NiČ! | #NiČ! | #NiČ! | #NiČ! |       |
| 565 | 2 6578233     | 6     | 6     | 7     | 6     | 5     | 7     | 5     | 6     | 5     | 5     | 5     | 6     | 5     | 6     | 5     | 6     | 7     | 4     | 5     | 5     | 3     | 3     | 3     | 3     | 2     | 17            | 1     | 5     | 2     | 4,76  | 17,00 | 1,00  | 34    | #NiČ! |       |       |       |
| 566 | 2 2774439     | 4     | 4     | 4     | 4     | 5     | 6     | 6     | 6     | 6     | 6     | 6     | 6     | 6     | 6     | 5     | 5     | 5     | 3     | 3     | 3     | 3     | 3     | 3     | 3     | 2     | 1             | 2     | 2     | 4,29  | 1,00  | 2,00  | 34    | #NiČ! |       |       |       |       |
| 567 | 2 4137493     | 6     | 6     | 7     | 6     | 6     | 7     | 6     | 6     | 6     | 6     | 6     | 6     | 6     | 6     | 5     | 6     | 6     | 1     | 4     | 4     | 1     | 3     | 1     | 1     | 6     | 15            | 3     | 5     | 1     | 5,06  | 15,00 | 1,00  | 34    | #NiČ! |       |       |       |
| 568 | #NiČ! 2364152 | #NiČ! | #NiČ! | #NiČ! | #NiČ! | #NiČ! | #NiČ! | #NiČ! | #NiČ! | #NiČ! | #NiČ! | #NiČ! | #NiČ! | #NiČ! | #NiČ! | #NiČ! | #NiČ! | #NiČ! | #NiČ! | #NiČ! | #NiČ! | #NiČ! | #NiČ! | #NiČ! | #NiČ! | #NiČ! | #NiČ!         | #NiČ! | #NiČ! | #NiČ! | #NiČ! | #NiČ! | #NiČ! | #NiČ! | #NiČ! | #NiČ! | #NiČ! |       |
| 569 | 2 9408278     | 5     | 6     | 7     | 6     | 6     | 7     | 5     | 6     | 6     | 6     | 6     | 6     | 5     | 5     | 7     | 6     | 5     | 6     | 2     | 5     | 4     | 3     | 2     | 2     | 1     | 3             | 1     | 2     | 2     | 4,88  | 1,00  | 2,00  | 34    | #NiČ! |       |       |       |
| 570 | #NiČ! 9948935 | #NiČ! | #NiČ! | #NiČ! | #NiČ! | #NiČ! | #NiČ! | #NiČ! | #NiČ! | #NiČ! | #NiČ! | #NiČ! | #NiČ! | #NiČ! | #NiČ! | #NiČ! | #NiČ! | #NiČ! | #NiČ! | #NiČ! | #NiČ! | #NiČ! | #NiČ! | #NiČ! | #NiČ! | #NiČ! | #NiČ!         | #NiČ! | #NiČ! | #NiČ! | #NiČ! | #NiČ! | #NiČ! | #NiČ! | #NiČ! | #NiČ! | #NiČ! |       |
| 571 | 2 1519842     | 4     | 6     | 6     | 6     | 6     | 6     | 6     | 5     | 5     | 6     | 6     | 6     | 6     | 6     | 6     | 6     | 6     | 3     | 3     | 3     | 3     | 3     | 3     | 3     | 6     | 6             | 1     | 5     | 2     | 4,76  | 6,00  | 3,00  | 34    | #NiČ! |       |       |       |
| 572 | #NiČ! 7752404 | #NiČ! | #NiČ! | #NiČ! | #NiČ! | #NiČ! | #NiČ! | #NiČ! | #NiČ! | #NiČ! | #NiČ! | #NiČ! | #NiČ! | #NiČ! | #NiČ! | #NiČ! | #NiČ! | #NiČ! | #NiČ! | #NiČ! | #NiČ! | #NiČ! | #NiČ! | #NiČ! | #NiČ! | #NiČ! | #NiČ!         | #NiČ! | #NiČ! | #NiČ! | #NiČ! | #NiČ! | #NiČ! | #NiČ! | #NiČ! | #NiČ! | #NiČ! |       |
| 573 | 2 4202493     | 6     | 7     | 6     | 7     | 7     | 6     | 7     | 6     | 5     | 7     | 6     | 7     | 7     | 7     | 6     | 6     | 7     | 4     | 4     | 5     | 5     | 4     | 5     | 4     | 3     | 7             | 2     | 2     | 2     | 5,47  | 7,00  | 4,00  | 34    | #NiČ! |       |       |       |
| 574 | 2 7755255     | 7     | 7     | 7     | 7     | 7     | 7     | 7     | 7     | 7     | 7     | 7     | 7     | 7     | 7     | 6     | 4     | 4     | 5     | 5     | 5     | 5     | 5     | 4     | 4     | 2     | 8             | 3     | 4     | 2     | 5,76  | 8,00  | 1,00  | 34    | #NiČ! |       |       |       |
| 575 | 2 6168796     | 6     | 7     | 7     | 7     | 6     | 6     | 5     | 5     | 6     | 6     | 6     | 6     | 5     | 6     | 5     | 4     | 6     | 5     | 5     | 5     | 5     | 3     | 4     | 4     | 3     | 15            | 2     | 3     | 2     | 4,82  | 15,00 | 1,00  | 34    | #NiČ! |       |       |       |
| 576 | 2 7578215     | 5     | 5     | 5     | 5     | 4     | 6     | 3     | 5     | 4     | 4     | 5     | 5     | 4     | 7     | 4     | 3     | 7     | 3     | 4     | 4     | 4     | 4     | 4     | 3     | 4     | 1             | 2     | 2     | 2     | 3,76  | 1,00  | 2,00  | 34    | #NiČ! |       |       |       |
| 577 | 2 9384689     | 6     | 7     | 7     | 7     | 7     | 4     | 6     | 5     | 5     | 7     | 7     | 5     | 7     | 7     | 7     | 4     | 6     | 2     | 3     | 2     | 2     | 3     | 4     | 2     | 7     | #NiČ! Urgentn | 1     | 6     | 2     | 5,12  | 98,00 | 7,00  | 30    | 1,00  |       |       |       |
| 578 | 2 4188801     | 5     | 6     | 7     | 5     | 4     | 7     | 4     | 3     | 4     | 4     | 4     | 6     | 3     | 3     | 4     | 3     | 7     | 3     | 4     | 4     | 3     | 4     | 2     | 1     | 5     | 1             | 2     | 2     | 3,65  | 1,00  | 2,00  | 34    | #NiČ! |       |       |       |       |
| 579 | 2 2789938     | 6     | 7     | 6     | 6     | 7     | 5     | 6     | 6     | 6     | 6     | 6     | 6     | 6     | 6     | 5     | 4     | 6     | 5     | 4     | 5     | 5     | 5     | 5     | 5     | 1     | 12            | 3     | 5     | 2     | 4,88  | 12,00 | 1,00  | 34    | #NiČ! |       |       |       |
| 580 | 2 1383286     | 4     | 4     | 3     | 3     | 3     | 3     | 1     | 4     | 4     | 3     | 3     | 4     | 3     | 6     | 4     | 5     | 2     | 3     | 3     | 2     | 2     | 2     | 2     | 6     | 3     | 2             | 4     | 2     | 2,53  | 3,00  | 5,00  | 34    | #NiČ! |       |       |       |       |
| 581 | 2 8546619     | 6     | 6     | 7     | 5     | 5     | 5     | 6     | 5     | 6     | 6     | 6     | 7     | 6     | 6     | 6     | 7     | 4     | 4     | 4     | 3     | 3     | 3     | 3     | 4     | 1     | 2             | 2     | 4     | 2     | 4,94  | 1,00  | 2,00  | 34    | #NiČ! |       |       |       |
| 582 | 2 8583234     | 7     | 7     | 7     | 7     | 6     | 4     | 4     | 4     | 5     | 3     | 3     | 4     | 2     | 6     | 6     | 2     | 6     | 2     | 5     | 4     | 3     | 2     | 2     | 1     | 4     | 1             | 2     | 2     | 2     | 3,88  | 1,00  | 2,00  | 34    | #NiČ! |       |       |       |
| 583 | 2 7276314     | 7     | 7     | 7     | 7     | 7     | 7     | 7     | 6     | 6     | 7     | 7     | 6     | 7     | 7     | 7     | 7     | 3     | 5     | 5     | 4     | 4     | 3     | 4     | 3     | 8     | 3             | 4     | 2     | 5,82  | 8,00  | 1,00  | 34    | #NiČ! |       |       |       |       |
| 584 | 2 631869      | 5     | 5     | 6     | 4     | 5     | 5     | 5     | 4     | 4     | 3     | 4     | 3     | 4     | 5     | 4     | 5     | 5     | 3     | 3     | 3     | 3     | 3     | 4     | 4     | 2     | 17            | 2     | 4     | 2     | 3,47  | 17,00 | 1,00  | 34    | #NiČ! |       |       |       |
| 585 | 2 1330401     | 4     | 6     | 7     | 5     | 7     | 6     | 6     | 6     | 5     | 7     | 4     | 4     | 4     | 5     | 4     | 2     | 5     | 2     | 5     | 5     | 2     | 2     | 3     | 2     | 4     | 1             | 1     | 5     | 2     | 4,12  | 1,00  | 2,00  | 34    | #NiČ! |       |       |       |
| 587 | 2 4756401     | 7     | 7     | 7     | 7     | 7     | 7     | 7     | 7     | 7     | 7     | 7     | 7     | 7     | 7     | 7     | 7     | 7     | 5     | 5     | 5     | 5     | 5     | 5     | 5     | 2     | 3             | 3     | 2     | 2     | 6,00  | 3,00  | 5,00  | 34    | #NiČ! |       |       |       |
| 588 | 2 9790801     | 6     | 7     | 6     | 6     | 5     | 6     | 5     | 4     | 5     | 6     | 4     | 6     | 6     | 6     | 6     | 4     | 7     | 5     | 4     | 4     | 4     | 5     | 5     | 5     | 6     | 17            | 1     | 5     | 1     | 4,59  | 17,00 | 1,00  | 34    | #NiČ! |       |       |       |
| 589 | #NiČ! 4684801 | #NiČ! | #NiČ! | #NiČ! | #NiČ! | #NiČ! | #NiČ! | #NiČ! | #NiČ! | #NiČ! | #NiČ! | #NiČ! | #NiČ! | #NiČ! | #NiČ! | #NiČ! | #NiČ! | #NiČ! | #NiČ! | #NiČ! | #NiČ! | #NiČ! | #NiČ! | #NiČ! | #NiČ! | #NiČ! | #NiČ!         | #NiČ! | #NiČ! | #NiČ! | #NiČ! | #NiČ! | #NiČ! | #NiČ! | #NiČ! | #NiČ! | #NiČ! |       |
| 591 | #NiČ! 6203606 | #NiČ! | #NiČ! | #NiČ! | #NiČ! | #NiČ! | #NiČ! | #NiČ! | #NiČ! | #NiČ! | #NiČ! | #NiČ! | #NiČ! | #NiČ! | #NiČ! | #NiČ! | #NiČ! | #NiČ! | #NiČ! | #NiČ! | #NiČ! | #NiČ! | #NiČ! | #NiČ! | #NiČ! | #NiČ! | #NiČ!         | #NiČ! | #NiČ! | #NiČ! | #NiČ! | #NiČ! | #NiČ! | #NiČ! | #NiČ! | #NiČ! | #NiČ! | #NiČ! |
| 592 | 2 8863227     | 4     | 5     | 5     | 5     | 5     | 5     | 4     | 3     | 3     | 5     | 5     | 2     | 4     | 4     | 4     | 3     | 5     | 3     | 3     | 4     | 3     | 3     | 3     | 3     | 1     | 12            | 3     | 4     | 2     | 3,18  | 12,00 | 1,00  | 34    | #NiČ! |       |       |       |
| 593 | 2 4051602     | 7     | 7     | 7     | 7     | 7     | 7     | 7     | 6     | 7     | 7     | 7     | 6     | 7     | 7     | 6     | 6     | 7     | 3     | 4     | 4     | 3     | 3     | 3     | 3     | 7     | 2             | 3     | 2     | 5,76  | 7,00  | 4,00  | 34    | #NiČ! |       |       |       |       |
| 594 | 2 5705317     | 6     | 6     | 7     | 7     | 6     | 6     | 6     | 5     | 6     | 6     | 4     | 5     | 6     | 6     | 6     | 6     | 4     | 4     | 5     | 3     | 4     | 3     | 3     | 2     | 17    | 2             | 4     | 2     | 4,88  | 17,00 | 1,00  | 34    | #NiČ! |       |       |       |       |
| 595 | 2 1936904     | 4     | 5     | 5     | 4     | 3     | 4     | 3     | 3     | 3     | 3     | 3     | 3     | 5     | 4     | 1     | 4     | 2     | 3     | 2     | 2     | 2     | 2     | 2     | 2     | 1     | 3             | 4     | 2     | 2,53  | 1,00  | 2,00  | 34    | #NiČ! |       |       |       |       |
| 596 | 2 2568569     | 6     | 7     | 7     | 6     | 7     | 6     | 6     | 6     | 6     | 7     | 6     | 6     | 6     | 6     | 6     | 6     | 6     | 5     | 5     | 5     | 5     | 4     | 4     | 4     | 3     | 7             | 2     | 4     | 2     | 5,24  | 7,00  | 4,00  | 34    | #NiČ! |       |       |       |
| 597 | 2 7032132     | 4     | 5     | 6     | 6     | 6     | 6     | 6     | 3     | 5     | 5     | 5     | 5     | 5     | 5     | 1     | 2     | 3     | 5     | 5     | 3     | 3     | 4     | 3     | 6     | 3     | 2             | 4     | 2     | 3,71  | 3,00  | 5,00  | 34    | #NiČ! |       |       |       |       |
| 598 | 2 7454955     | 7     | 7     | 7     | 7     | 7     | 7     | 7     | 6     | 6     | 7     | 1     | 7     | 7     | 7     | 6     | 6     | 6     | 4     | 5     | 5     | 5     | 5     | 5     | 5     | 6     | 6             | 2     | 2     | 2     | 5,35  | 6,00  | 3,00  | 34    | #NiČ! |       |       |       |
| 599 | 2 6178377     | 6     | 7     | 7     | 7     | 7     | 7     | 6     | 6     | 7     | 7     | 7     | 6     | 6     | 7     | 6     | 5     | 7     | 5     | 5     | 5     | 5     | 5     | 5     | 5     | 3     | 1             | 2     | 3     | 2     | 5,53  | 1,00  | 2,00  | 34    | #NiČ! |       |       |       |
| 600 | #NiČ! 8527021 | #NiČ! | #NiČ! | #NiČ! | #NiČ! | #NiČ! | #NiČ! | #NiČ! | #NiČ! | #NiČ! | #NiČ! | #NiČ! | #NiČ! | #NiČ! | #NiČ! | #NiČ! | #NiČ! | #NiČ! | #NiČ! | #NiČ! | #NiČ! | #NiČ! | #NiČ! | #NiČ! | #NiČ! | #NiČ! | #NiČ!         | #NiČ! | #NiČ! | #NiČ! | #NiČ! | #NiČ! | #NiČ! | #NiČ! | #NiČ! | #NiČ! | #NiČ! |       |
| 601 | 2 4099973     | 6     | 7     | 7     | 7     | 7     | 6     | 6     | 7     | 7     | 7     | 7     | 7     | 7     | 6     | 6     | 7     | 4     | 5     | 5     | 5     | 4     | 4     | 4     | 3     | 7     | 2             | 4     | 2     | 5,71  | 7,00  | 4,00  | 34    | #NiČ! |       |       |       |       |
| 602 | 2 4918804     | 5     | 5     | 5     | 4     | 4     | 7     | 4     | 4     | 5     | 3     | 5     | 5     | 4     | 5     | 4     | 3     | 5     |       |       |       |       |       |       |       |       |               |       |       |       |       |       |       |       |       |       |       |       |



|     |               |       |       |       |       |       |       |       |       |       |       |       |       |       |       |       |       |       |       |       |       |       |       |       |       |               |               |       |       |       |       |       |       |       |       |
|-----|---------------|-------|-------|-------|-------|-------|-------|-------|-------|-------|-------|-------|-------|-------|-------|-------|-------|-------|-------|-------|-------|-------|-------|-------|-------|---------------|---------------|-------|-------|-------|-------|-------|-------|-------|-------|
| 661 | 2 1108010     | 6     | 6     | 6     | 6     | 6     | 6     | 6     | 6     | 6     | 6     | 6     | 6     | 6     | 6     | 6     | 2     | 3     | 3     | 3     | 3     | 3     | 3     | 3     | 7     | 2             | 2             | 2     | 5,00  | 7,00  | 4,00  | 34    | #NIČ! |       |       |
| 662 | 2 8946266     | 6     | 6     | 7     | 6     | 6     | 7     | 6     | 6     | 6     | 7     | 6     | 6     | 6     | 6     | 6     | 2     | 5     | 5     | 5     | 5     | 5     | 5     | 3     | 5     | 2             | 4             | 2     | 5,24  | 5,00  | 3,00  | 34    | #NIČ! |       |       |
| 663 | #NIČ! 1407301 | #NIČ! | #NIČ! | #NIČ! | #NIČ! | #NIČ! | #NIČ! | #NIČ! | #NIČ! | #NIČ! | #NIČ! | #NIČ! | #NIČ! | #NIČ! | #NIČ! | #NIČ! | #NIČ! | #NIČ! | #NIČ! | #NIČ! | #NIČ! | #NIČ! | #NIČ! | #NIČ! | #NIČ! | #NIČ!         | #NIČ!         | #NIČ! | #NIČ! | #NIČ! | #NIČ! | #NIČ! | #NIČ! | #NIČ! | #NIČ! |
| 664 | 2 197707      | 6     | 7     | 7     | 7     | 7     | 6     | 7     | 7     | 6     | 7     | 7     | 7     | 7     | 6     | 7     | 6     | 6     | 4     | 4     | 4     | 4     | 3     | 5     | 4     | 3             | 7             | 2     | 4     | 2     | 5,65  | 7,00  | 4,00  | 34    | #NIČ! |
| 665 | 2 6766631     | 6     | 7     | 7     | 6     | 6     | 7     | 6     | 6     | 6     | 7     | 7     | 7     | 7     | 6     | 5     | 7     | 4     | 4     | 4     | 4     | 4     | 3     | 3     | 4     | 7             | 2             | 4     | 2     | 5,47  | 7,00  | 4,00  | 34    | #NIČ! |       |
| 666 | #NIČ! 3240037 | #NIČ! | #NIČ! | #NIČ! | #NIČ! | #NIČ! | #NIČ! | #NIČ! | #NIČ! | #NIČ! | #NIČ! | #NIČ! | #NIČ! | #NIČ! | #NIČ! | #NIČ! | #NIČ! | #NIČ! | #NIČ! | #NIČ! | #NIČ! | #NIČ! | #NIČ! | #NIČ! | #NIČ! | #NIČ!         | #NIČ!         | #NIČ! | #NIČ! | #NIČ! | #NIČ! | #NIČ! | #NIČ! | #NIČ! | #NIČ! |
| 667 | #NIČ! 5900290 | #NIČ! | #NIČ! | #NIČ! | #NIČ! | #NIČ! | #NIČ! | #NIČ! | #NIČ! | #NIČ! | #NIČ! | #NIČ! | #NIČ! | #NIČ! | #NIČ! | #NIČ! | #NIČ! | #NIČ! | #NIČ! | #NIČ! | #NIČ! | #NIČ! | #NIČ! | #NIČ! | #NIČ! | #NIČ!         | #NIČ!         | #NIČ! | #NIČ! | #NIČ! | #NIČ! | #NIČ! | #NIČ! | #NIČ! | #NIČ! |
| 668 | 2 9781341     | 5     | 5     | 6     | 6     | 6     | 4     | 5     | 5     | 5     | 5     | 5     | 5     | 5     | 5     | 5     | 4     | 5     | 4     | 4     | 4     | 4     | 4     | 3     | 7     | 2             | 4             | 2     | 4,12  | 7,00  | 4,00  | 34    | #NIČ! |       |       |
| 669 | 2 1205835     | 3     | 4     | 4     | 4     | 4     | 4     | 4     | 4     | 4     | 4     | 4     | 4     | 4     | 4     | 4     | 3     | 3     | 3     | 3     | 3     | 3     | 3     | 3     | 7     | 2             | 2             | 2     | 2,94  | 7,00  | 4,00  | 34    | #NIČ! |       |       |
| 670 | 2 6685152     | 7     | 7     | 7     | 7     | 7     | 7     | 7     | 7     | 7     | 7     | 7     | 7     | 7     | 7     | 7     | 4     | 5     | 5     | 4     | 5     | 5     | 4     | 3     | 7     | 2             | 2             | 2     | 6,00  | 7,00  | 4,00  | 34    | #NIČ! |       |       |
| 671 | 2 9808254     | 3     | 5     | 5     | 4     | 2     | 6     | 4     | 3     | 2     | 4     | 5     | 4     | 4     | 6     | 6     | 6     | 7     | 3     | 5     | 4     | 2     | 2     | 4     | 1     | 2             | 1             | 1     | 5     | 2     | 3,47  | 1,00  | 2,00  | 34    | #NIČ! |
| 672 | 2 8985814     | 5     | 7     | 5     | 4     | 5     | 3     | 5     | 3     | 5     | 6     | 4     | 2     | 4     | 5     | 7     | 5     | 6     | 1     | 5     | 5     | 2     | 2     | 2     | 3     | 5             | 8             | 3     | 4     | 2     | 3,76  | 8,00  | 1,00  | 34    | #NIČ! |
| 673 | 2 5504309     | 7     | 6     | 7     | 6     | 5     | 6     | 5     | 4     | 4     | 5     | 4     | 4     | 5     | 7     | 4     | 4     | 7     | 2     | 5     | 4     | 3     | 2     | 3     | 3     | 8             | #NIČ! uprava  | 4     | 2     | 4,29  | 98,00 | 7,00  | 26    | 1,00  |       |
| 674 | 2 564105      | 6     | 7     | 7     | 6     | 7     | 7     | 7     | 7     | 6     | 7     | 7     | 5     | 7     | 7     | 7     | 6     | 7     | 5     | 5     | 5     | 5     | 5     | 5     | 9     | #NIČ! SIM cen | 2             | 4     | 2     | 5,65  | 98,00 | 7,00  | 18    | 1,00  |       |
| 675 | 2 6307599     | 5     | 7     | 6     | 6     | 6     | 4     | 5     | 4     | 4     | 6     | 6     | 4     | 5     | 5     | 5     | 4     | 5     | 3     | 4     | 4     | 3     | 3     | 3     | 7     | #NIČ!         | 1             | 5     | 2     | 4,12  | #NIČ! | #NIČ! | 34    | #NIČ! |       |
| 676 | 2 9845680     | 6     | 7     | 7     | 7     | 7     | 6     | 7     | 2     | 6     | 7     | 7     | 7     | 7     | 7     | 6     | 7     | 7     | 2     | 4     | 5     | 5     | 4     | 5     | 4     | 1             | 2             | 2     | 3     | 2     | 5,47  | 2,00  | 5,00  | 34    | #NIČ! |
| 677 | 2 305604      | 4     | 6     | 6     | 6     | 6     | 6     | 6     | 6     | 6     | 5     | 4     | 6     | 6     | 6     | 6     | 4     | 6     | 4     | 4     | 4     | 4     | 4     | 3     | 3     | 2             | 19            | 2     | 3     | 2     | 4,59  | 98,00 | 1,00  | 34    | #NIČ! |
| 678 | 2 1990981     | 6     | 7     | 6     | 5     | 5     | 5     | 6     | 6     | 6     | 7     | 7     | 6     | 6     | 6     | 4     | 5     | 5     | 3     | 4     | 5     | 3     | 3     | 4     | 4     | 7             | #NIČ! Urgenca | 1     | 6     | 2     | 4,76  | 98,00 | 7,00  | 29    | 1,00  |
| 679 | 2 9038093     | 3     | 4     | 4     | 4     | 3     | 4     | 4     | 4     | 4     | 3     | 3     | 3     | 4     | 3     | 2     | 2     | 2     | 3     | 3     | 3     | 3     | 2     | 2     | 1     | 4             | 1             | 1     | 5     | 2     | 2,29  | 1,00  | 2,00  | 34    | #NIČ! |
| 680 | 2 9217523     | 4     | 5     | 5     | 4     | 5     | 5     | 5     | 5     | 5     | 5     | 4     | 5     | 5     | 5     | 4     | 1     | 5     | 3     | 4     | 4     | 3     | 3     | 4     | 4     | 4             | 4             | 2     | 2     | 2     | 3,53  | 4,00  | 6,00  | 34    | #NIČ! |
| 681 | 2 8973335     | 7     | 7     | 7     | 7     | 7     | 7     | 7     | 7     | 7     | 7     | 7     | 7     | 7     | 7     | 7     | 7     | 7     | 5     | 5     | 5     | 5     | 5     | 5     | 5     | 6             | 14            | 3     | 5     | 2     | 6,00  | 14,00 | 1,00  | 34    | #NIČ! |
| 682 | 2 7214108     | 7     | 7     | 7     | 7     | 7     | 7     | 7     | 7     | 7     | 7     | 7     | 7     | 7     | 7     | 7     | 7     | 7     | 5     | 5     | 5     | 5     | 5     | 5     | 5     | 6             | 5             | 1     | 4     | 2     | 6,00  | 5,00  | 3,00  | 34    | #NIČ! |
| 683 | #NIČ! 9150535 | #NIČ! | #NIČ! | #NIČ! | #NIČ! | #NIČ! | #NIČ! | #NIČ! | #NIČ! | #NIČ! | #NIČ! | #NIČ! | #NIČ! | #NIČ! | #NIČ! | #NIČ! | #NIČ! | #NIČ! | #NIČ! | #NIČ! | #NIČ! | #NIČ! | #NIČ! | #NIČ! | #NIČ! | #NIČ!         | #NIČ!         | #NIČ! | #NIČ! | #NIČ! | #NIČ! | #NIČ! | #NIČ! | #NIČ! | #NIČ! |
| 684 | 2 4110352     | 3     | 4     | 7     | 1     | 4     | 7     | 7     | 4     | 7     | 7     | 3     | 4     | 5     | 5     | 6     | 6     | 3     | 3     | 4     | 4     | 2     | 3     | 3     | 2     | 3             | 1             | 2     | 2     | 2     | 3,88  | 1,00  | 2,00  | 34    | #NIČ! |
| 685 | 2 3100156     | 6     | 6     | 6     | 6     | 6     | 6     | 6     | 6     | 6     | 6     | 6     | 6     | 6     | 6     | 5     | 6     | 4     | 4     | 4     | 4     | 4     | 4     | 3     | 6     | 2             | 1             | 6     | 2     | 4,94  | 2,00  | 5,00  | 34    | #NIČ! |       |
| 686 | 2 3169723     | 7     | 7     | 7     | 6     | 6     | 6     | 6     | 6     | 6     | 6     | 6     | 5     | 6     | 6     | 6     | 5     | 6     | 3     | 3     | 3     | 2     | 3     | 3     | 1     | 14            | #NIČ! prof.z  | 4     | 2     | 5,12  | 14,00 | 1,00  | 34    | #NIČ! |       |
| 687 | 2 6548149     | 6     | 7     | 6     | 6     | 6     | 6     | 6     | 6     | 5     | 6     | 6     | 5     | 6     | 6     | 6     | 6     | 6     | 3     | 4     | 4     | 4     | 4     | 4     | 5     | 1             | 1             | 5     | 2     | 4,94  | 1,00  | 2,00  | 34    | #NIČ! |       |
| 688 | 2 3231575     | 6     | 7     | 7     | 7     | 7     | 6     | 7     | 7     | 7     | 7     | 7     | 7     | 7     | 6     | 5     | 7     | 3     | 5     | 5     | 4     | 3     | 3     | 3     | 3     | 6             | 3             | 2     | 2     | 5,71  | 6,00  | 3,00  | 34    | #NIČ! |       |
| 689 | 2 6513430     | 7     | 7     | 7     | 7     | 7     | 7     | 7     | 7     | 7     | 7     | 7     | 7     | 7     | 7     | 7     | 7     | 5     | 5     | 5     | 5     | 5     | 5     | 5     | 3     | 23            | 1             | 5     | 2     | 6,00  | 98,00 | 1,00  | 34    | #NIČ! |       |
| 690 | 2 2872426     | 5     | 6     | 7     | 5     | 6     | 6     | 5     | 6     | 6     | 6     | 6     | 6     | 6     | 6     | 5     | 6     | 1     | 5     | 4     | 3     | 4     | 5     | 3     | 6     | 1             | 2             | 4     | 2     | 4,82  | 1,00  | 2,00  | 34    | #NIČ! |       |
| 691 | 2 4821838     | 1     | 5     | 5     | 6     | 5     | 6     | 6     | 5     | 5     | 5     | 5     | 4     | 5     | 4     | 3     | 4     | 3     | 3     | 3     | 3     | 3     | 3     | 1     | 2     | 2             | 3             | 2     | 2     | 3,65  | 2,00  | 5,00  | 34    | #NIČ! |       |
| 692 | 2 5491914     | 3     | 4     | 7     | 6     | 6     | 7     | 6     | 6     | 7     | 7     | 7     | 7     | 7     | 7     | 7     | 5     | 5     | 5     | 5     | 5     | 5     | 5     | 5     | 2     | 6             | 1             | 4     | 2     | 5,35  | 6,00  | 3,00  | 34    | #NIČ! |       |
| 693 | 2 2994056     | 4     | 7     | 5     | 4     | 4     | 4     | 4     | 3     | 4     | 5     | 4     | 5     | 4     | 4     | 5     | 1     | 5     | 2     | 3     | 2     | 1     | 1     | 1     | 1     | 6             | 6             | 1     | 4     | 2     | 3,24  | 6,00  | 3,00  | 34    | #NIČ! |
| 694 | 2 8494539     | 6     | 7     | 7     | 7     | 7     | 7     | 6     | 7     | 6     | 7     | 7     | 7     | 7     | 6     | 6     | 7     | 4     | 5     | 5     | 5     | 5     | 5     | 5     | 1     | 6             | 1             | 4     | 2     | 5,71  | 6,00  | 3,00  | 34    | #NIČ! |       |
| 695 | 2 3490527     | 7     | 7     | 6     | 7     | 7     | 7     | 6     | 6     | 7     | 7     | 7     | 7     | 7     | 6     | 7     | 7     | 5     | 5     | 5     | 5     | 5     | 5     | 5     | 1     | 6             | 2             | 2     | 2     | 5,76  | 6,00  | 3,00  | 34    | #NIČ! |       |
| 696 | 2 1969017     | 7     | 5     | 7     | 4     | 5     | 7     | 3     | 4     | 4     | 5     | 3     | 2     | 5     | 3     | 2     | 6     | 2     | 3     | 3     | 2     | 2     | 2     | 1     | 6     | 9             | 2             | 4     | 2     | 3,41  | 9,00  | 1,00  | 34    | #NIČ! |       |
| 697 | 2 9373503     | 6     | 6     | 6     | 6     | 6     | 6     | 6     | 6     | 6     | 6     | 6     | 6     | 6     | 6     | 6     | 3     | 3     | 3     | 3     | 3     | 3     | 3     | 3     | 2     | 2             | 1             | 5     | 2     | 5,00  | 2,00  | 5,00  | 34    | #NIČ! |       |
| 698 | 2 960467      | 6     | 7     | 7     | 7     | 7     | 7     | 6     | 6     | 7     | 7     | 7     | 7     | 7     | 6     | 6     | 7     | 4     | 5     | 5     | 4     | 5     | 4     | 4     | 1     | 18            | 3             | 2     | 1     | 5,71  | 18,00 | 3,00  | 34    | #NIČ! |       |
| 699 | 2 6681824     | 7     | 7     | 6     | 6     | 6     | 6     | 6     | 6     | 6     | 6     | 6     | 6     | 6     | 6     | 6     | 5     | 4     | 4     | 4     | 4     | 4     | 4     | 4     | 3     | 5             | 2             | 2     | 2     | 5,06  | 5,00  | 3,00  | 34    | #NIČ! |       |
| 700 | 2 527719      | 4     | 7     | 7     | 4     | 4     | 6     | 5     | 4     | 5     | 5     | 4     | 6     | 6     | 7     | 6     | 2     | 6     | 3     | 3     | 3     | 3     | 3     | 2     | 2     | 3             | #NIČ!         | 4     | 2     | 2     | 4,18  | #NIČ! | #NIČ! | 34    | #NIČ! |
| 701 | 2 2593123     | 7     | 7     | 6     | 6     | 6     | 7     | 5     | 6     | 6     | 5     | 6     | 7     | 7     | 6     | 5     | 4     | 7     | 1     | 4     | 5     | 4     | 3     | 4     | 4     | 6             | 6             | 1     | 5     | 1     | 5,06  | 6,00  | 3,00  | 34    | #NIČ! |
| 702 | #NIČ! 1382459 | #NIČ! | #NIČ! | #NIČ! | #NIČ! | #NIČ! | #NIČ! | #NIČ! | #NIČ! | #NIČ! | #NIČ! | #NIČ! | #NIČ! | #NIČ! | #NIČ! | #NIČ! | #NIČ! | #NIČ! | #NIČ! | #NIČ! | #NIČ! | #NIČ! | #NIČ! | #NIČ! | #NIČ! | #NIČ!         | #NIČ!         | #NIČ! | #NIČ! | #NIČ! | #NIČ! | #NIČ! | #NIČ! | #NIČ! | #NIČ! |
| 703 | 2 9132928     | 5     | 7     | 7     | 6     | 5     | 7     | 4     | 4     | 4     | 6     | 7     | 7     | 5     | 6     | 5     | 3     | 7     | 4     | 4     | 4     | 3     | 3     | 2     | 3     | 8             | #NIČ!         | 4     | 3     | 2     | 4,59  | #NIČ! | #NIČ! | 34    | #NIČ! |
| 704 | 2 1517262     | 6     | 6     | 7     | 7     | 7     | 7     | 7     | 7     | 7     | 7     | 7     | 7     | 7     | 6     | 7     | 3     | 4     | 4     | 4     | 2     | 4     | 3     | 3     | 6     | 1             | 1             | 5     | 2     | 5,82  | 1,00  | 2,00  | 34    | #NIČ! |       |
| 705 | 2 187527      | 4     | 5     | 6     | 4     | 4     | 5     | 4     | 3     | 4     | 5     | 6     | 3     | 4     | 4     | 1     | 3     | 6     | 2     | 3     | 2     | 2     | 3     | 3     | 2     | 1             | 8             | 3     | 4     | 2     | 3,18  | 8,00  | 1,00  | 34    | #NIČ! |
| 706 | 2 6385850     | 3     | 4     | 5     | 2     | 3     | 3     | 3     | 2     | 3     | 3     | 2     | 2     | 2     | 3     | 3     | 6     | 3     | 3     | 4     | 4     | 4     | 3     | 3     | 2     | 13            | 2             | 2     | 2     | 2,06  | 98,00 | 6,00  | 34    | #NIČ! |       |
| 707 | 2 1366667     | 7     | 7     | 7     | 6     | 7     | 7     | 6     | 7     | 6     | 7     | 6     | 7     | 7     | 7     | 6     | 7     | 2     | 5     | 4     | 3     | 3     | 2     | 2     | 6     | 5             | 1             | 4     | 2     | 5,71  | 5,00  | 3,00  | 34    | #NIČ! |       |
| 708 | 2 7675785     | 4     | 7     | 7     | 7     | 7     | 7     | 7     | 6     | 6     | 7     | 7     | 7     | 7     | 6     | 2     | 7     | 3     | 3     | 3     | 3     | 3     | 3     | 3     | 3     | 7             | 2             | 4     | 2     | 5,35  | 7,00  | 4,00  | 34    | #NIČ! |       |
| 709 | 2 4278924     | 7     | 7     | 7     | 7     | 7     | 7     | 7     | 7     | 7     | 7     | 7     | 7     | 7     | 7     | 7     | 5     | 5     | 5     | 5     | 5     | 5     | 5     | 5     | 2     | 9             | 1             | 5     | 2     | 6,00  | 9,00  | 1,00  | 34    | #NIČ! |       |
| 710 | 2 8367268     | 6     | 7     | 7     | 7     | 7     | 6     | 6     | 7     | 7     | 6     | 7     | 6     | 6     | 6     | 6     | 6     | 3     | 3     | 5     | 4     | 3     | 4     | 4     | 1     | 3             | 1             | 5     | 1     | 5,47  | 3,00  | 5,00  | 34    | #NIČ! |       |
| 711 | 2 8999567     | 5     | 5     | 5     | 4     | 5     | 5     | 5     | 6     | 5     | 6     | 5     | 5     | 5     | 6     | 5     | 6     | 5     | 4     | 3     | 3     | 3     | 3     | 3     | 4     | 7             | 2             | 4     | 2     | 4,18  | 7,00  | 4,00  | 34    | #NIČ! |       |
| 712 | 2 9896033     | 5     | 5     | 5     | 5     | 4     | 4     | 5     | 5</   |       |       |       |       |       |       |       |       |       |       |       |       |       |       |       |       |               |               |       |       |       |       |       |       |       |       |

|     |               |       |       |       |       |       |       |       |       |       |       |       |       |       |       |       |       |       |       |       |       |       |       |       |       |       |       |       |       |       |       |       |       |       |       |       |
|-----|---------------|-------|-------|-------|-------|-------|-------|-------|-------|-------|-------|-------|-------|-------|-------|-------|-------|-------|-------|-------|-------|-------|-------|-------|-------|-------|-------|-------|-------|-------|-------|-------|-------|-------|-------|-------|
| 715 | 2 6151725     | 6     | 7     | 6     | 6     | 6     | 7     | 6     | 7     | 7     | 6     | 7     | 7     | 7     | 6     | 6     | 7     | 3     | 5     | 5     | 4     | 4     | 4     | 3     | 1     | 1     | 1     | 5     | 2     | 5,47  | 1,00  | 2,00  | 34    | #NIČ! |       |       |
| 716 | 2 2600953     | 5     | 7     | 7     | 7     | 5     | 4     | 6     | 5     | 4     | 7     | 7     | 4     | 7     | 7     | 5     | 5     | 7     | 3     | 4     | 4     | 3     | 3     | 4     | 3     | 2     | #NIČ! | 4     | 2     | 2     | 4,82  | #NIČ! | #NIČ! | 34    | #NIČ! |       |
| 717 | #NIČ! 4549592 | #NIČ! | #NIČ! | #NIČ! | #NIČ! | #NIČ! | #NIČ! | #NIČ! | #NIČ! | #NIČ! | #NIČ! | #NIČ! | #NIČ! | #NIČ! | #NIČ! | #NIČ! | #NIČ! | #NIČ! | #NIČ! | #NIČ! | #NIČ! | #NIČ! | #NIČ! | #NIČ! | #NIČ! | #NIČ! | #NIČ! | #NIČ! | #NIČ! | #NIČ! | #NIČ! | #NIČ! | #NIČ! | 34    | #NIČ! |       |
| 718 | #NIČ! 4945102 | #NIČ! | #NIČ! | #NIČ! | #NIČ! | #NIČ! | #NIČ! | #NIČ! | #NIČ! | #NIČ! | #NIČ! | #NIČ! | #NIČ! | #NIČ! | #NIČ! | #NIČ! | #NIČ! | #NIČ! | #NIČ! | #NIČ! | #NIČ! | #NIČ! | #NIČ! | #NIČ! | #NIČ! | #NIČ! | #NIČ! | #NIČ! | #NIČ! | #NIČ! | #NIČ! | #NIČ! | #NIČ! | #NIČ! | 34    | #NIČ! |
| 719 | 2 1076734     | 6     | 6     | 7     | 6     | 6     | 4     | 5     | 5     | 5     | 6     | 4     | 5     | 7     | 6     | 5     | 3     | 4     | 3     | 4     | 5     | 5     | 4     | 4     | 3     | 3     | 5     | 1     | 4     | 2     | 4,29  | 5,00  | 3,00  | 34    | #NIČ! |       |
| 720 | 2 548364      | 6     | 7     | 6     | 7     | 6     | 6     | 6     | 6     | 5     | 7     | 6     | 7     | 7     | 7     | 6     | 5     | 7     | 4     | 4     | 4     | 4     | 4     | 3     | 2     | 4     | 1     | 1     | 5     | 2     | 5,29  | 1,00  | 2,00  | 34    | #NIČ! |       |
| 721 | 2 9511618     | 7     | 7     | 7     | 7     | 7     | 7     | 7     | 7     | 7     | 7     | 7     | 7     | 7     | 7     | 7     | 7     | 5     | 5     | 5     | 5     | 5     | 5     | 5     | 5     | 6     | 12    | 3     | 2     | 2     | 6,00  | 12,00 | 1,00  | 34    | #NIČ! |       |
| 722 | 2 5912997     | 4     | 4     | 4     | 4     | 4     | 4     | 4     | 4     | 4     | 4     | 4     | 4     | 4     | 4     | 4     | 4     | 3     | 3     | 3     | 3     | 3     | 3     | 3     | 3     | 6     | 12    | 3     | 5     | 2     | 3,00  | 12,00 | 1,00  | 34    | #NIČ! |       |
| 723 | 2 1030131     | 6     | 6     | 6     | 6     | 6     | 6     | 6     | 5     | 5     | 6     | 6     | 6     | 6     | 6     | 5     | 6     | 6     | 4     | 4     | 4     | 4     | 4     | 4     | 2     | 5     | 1     | 7     | 2     | 4,82  | 5,00  | 3,00  | 34    | #NIČ! |       |       |
| 724 | 2 7411666     | 6     | 6     | 6     | 4     | 4     | 4     | 5     | 4     | 4     | 4     | 5     | 4     | 5     | 4     | 4     | 3     | 4     | 2     | 3     | 4     | 3     | 3     | 1     | 1     | 3     | 5     | 1     | 5     | 2     | 3,47  | 5,00  | 3,00  | 34    | #NIČ! |       |
| 725 | 2 3967936     | 6     | 7     | 6     | 6     | 6     | 6     | 6     | 6     | 7     | 6     | 6     | 6     | 6     | 6     | 6     | 5     | 7     | 1     | 4     | 5     | 4     | 4     | 4     | 3     | 6     | 6     | 1     | 4     | 2     | 5,12  | 6,00  | 3,00  | 34    | #NIČ! |       |
| 726 | 2 7604682     | 7     | 7     | 7     | 7     | 7     | 7     | 7     | 7     | 7     | 7     | 7     | 7     | 7     | 7     | 6     | 7     | 3     | 5     | 5     | 4     | 5     | 3     | 3     | 2     | 4     | 2     | 4     | 2     | 5,94  | 4,00  | 6,00  | 34    | #NIČ! |       |       |
| 727 | 2 6119601     | 7     | 7     | 7     | 7     | 7     | 7     | 7     | 7     | 7     | 7     | 7     | 7     | 7     | 7     | 5     | 7     | 5     | 5     | 5     | 3     | 3     | 2     | 3     | 2     | 6     | 1     | 4     | 2     | 5,88  | 6,00  | 3,00  | 34    | #NIČ! |       |       |
| 728 | 2 7783962     | 6     | 7     | 7     | 7     | 7     | 7     | 7     | 6     | 7     | 7     | 7     | 7     | 7     | 6     | 7     | 7     | 5     | 4     | 4     | 4     | 4     | 4     | 4     | 1     | 1     | 2     | 2     | 2     | 5,82  | 1,00  | 2,00  | 34    | #NIČ! |       |       |
| 729 | 2 561006      | 7     | 7     | 7     | 7     | 7     | 7     | 7     | 7     | 7     | 7     | 7     | 7     | 7     | 7     | 7     | 5     | 5     | 5     | 5     | 5     | 5     | 5     | 5     | 3     | 18    | 3     | 1     | 2     | 6,00  | 18,00 | 3,00  | 34    | #NIČ! |       |       |
| 730 | 2 9453143     | 4     | 7     | 7     | 4     | 5     | 4     | 4     | 4     | 4     | 7     | 7     | 3     | 7     | 7     | 3     | 4     | 7     | 3     | 3     | 3     | 3     | 2     | 1     | 2     | 5     | 6     | 1     | 4     | 2     | 4,18  | 6,00  | 3,00  | 34    | #NIČ! |       |
| 731 | 2 5582697     | 5     | 6     | 7     | 6     | 5     | 7     | 5     | 6     | 7     | 6     | 5     | 6     | 6     | 6     | 5     | 6     | 7     | 3     | 4     | 5     | 4     | 4     | 4     | 4     | 3     | 1     | 1     | 5     | 2     | 4,94  | 1,00  | 2,00  | 34    | #NIČ! |       |
| 732 | 2 9554057     | 7     | 7     | 7     | 7     | 7     | 7     | 7     | 7     | 7     | 7     | 7     | 7     | 7     | 7     | 7     | 7     | 4     | 4     | 4     | 4     | 4     | 3     | 3     | 4     | 5     | 1     | 4     | 2     | 6,00  | 5,00  | 3,00  | 34    | #NIČ! |       |       |
| 733 | 2 1022193     | 6     | 6     | 7     | 6     | 6     | 6     | 6     | 6     | 6     | 6     | 5     | 5     | 6     | 7     | 5     | 5     | 6     | 4     | 4     | 5     | 4     | 3     | 4     | 4     | 6     | 12    | 5     | 5     | 1     | 4,88  | 12,00 | 1,00  | 34    | #NIČ! |       |
| 734 | 2 6448797     | 3     | 7     | 6     | 5     | 6     | 4     | 6     | 6     | 6     | 7     | 6     | 6     | 6     | 7     | 5     | 4     | 5     | 5     | 5     | 5     | 5     | 4     | 4     | 6     | 20    | 2     | 2     | 2     | 4,59  | 20,00 | 1,00  | 34    | #NIČ! |       |       |
| 735 | #NIČ! 9177405 | #NIČ! | #NIČ! | #NIČ! | #NIČ! | #NIČ! | #NIČ! | #NIČ! | #NIČ! | #NIČ! | #NIČ! | #NIČ! | #NIČ! | #NIČ! | #NIČ! | #NIČ! | #NIČ! | #NIČ! | #NIČ! | #NIČ! | #NIČ! | #NIČ! | #NIČ! | #NIČ! | #NIČ! | #NIČ! | #NIČ! | #NIČ! | #NIČ! | #NIČ! | #NIČ! | #NIČ! | #NIČ! | #NIČ! | 34    | #NIČ! |
| 736 | 2 6540635     | 6     | 7     | 6     | 6     | 6     | 5     | 6     | 6     | 6     | 6     | 6     | 6     | 6     | 6     | 5     | 6     | 3     | 4     | 4     | 4     | 4     | 4     | 4     | 2     | 22    | 1     | 5     | 2     | 4,94  | 98,00 | 1,00  | 34    | #NIČ! |       |       |
| 737 | 2 5170958     | 7     | 7     | 7     | 7     | 7     | 7     | 7     | 7     | 7     | 7     | 7     | 7     | 7     | 7     | 7     | 7     | 5     | 5     | 5     | 5     | 5     | 5     | 5     | 6     | 14    | 2     | 3     | 2     | 6,00  | 14,00 | 1,00  | 34    | #NIČ! |       |       |
| 738 | 2 6232888     | 7     | 7     | 7     | 7     | 7     | 7     | 7     | 7     | 7     | 7     | 7     | 7     | 7     | 7     | 7     | 7     | 5     | 5     | 5     | 5     | 5     | 5     | 5     | 1     | 28    | 2     | 2     | 2     | 6,00  | 98,00 | 1,00  | 34    | #NIČ! |       |       |
| 739 | 2 5651566     | 5     | 7     | 5     | 6     | 4     | 6     | 3     | 2     | 4     | 7     | 7     | 7     | 7     | 5     | 5     | 5     | 7     | 3     | 5     | 5     | 4     | 4     | 5     | 4     | 7     | 1     | 1     | 5     | 2     | 4,41  | 1,00  | 2,00  | 34    | #NIČ! |       |
| 740 | 2 9559165     | 7     | 7     | 7     | 7     | 5     | 7     | 7     | 7     | 7     | 4     | 7     | 7     | 7     | 7     | 6     | 7     | 4     | 3     | 5     | 4     | 3     | 3     | 3     | 6     | 3     | 1     | 5     | 2     | 5,65  | 3,00  | 5,00  | 34    | #NIČ! |       |       |
| 741 | 2 841129      | 7     | 7     | 6     | 6     | 5     | 4     | 5     | 6     | 4     | 7     | 6     | 5     | 5     | 7     | 5     | 3     | 7     | 2     | 4     | 4     | 3     | 2     | 3     | 3     | 6     | 8     | 3     | 4     | 2     | 4,59  | 8,00  | 1,00  | 34    | #NIČ! |       |
